# Supplementary material for: Prospective comparison of acupuncture with sham acupuncture to determine impact on sedation and analgesia in mechanically ventilated critically ill patients (PASSION study): protocol for a randomised controlled trial
Source: PubMed Central journal article supplement — BMJ Open. 2022 Aug 30;12(8):e059741. doi: 10.1136/bmjopen-2021-059741 (PMC9438044; doi:10.1136/bmjopen-2021-059741), 2022-08-30
Supplement: bmjopen-2021-059741.draft_revisions.pdf [file bmjopen-2021-059741.draft_revisions.pdf]

# BMJ Open

BMJ Open is committed to open peer review. As part of this commitment we make the peer review history of every article we publish publicly available.

When an article is published we post the peer reviewers' comments and the authors' responses online. We also post the versions of the paper that were used during peer review. These are the versions that the peer review comments apply to.

The versions of the paper that follow are the versions that were submitted during the peer review process. They are not the versions of record or the final published versions. They should not be cited or distributed as the published version of this manuscript.

BMJ Open is an open access journal and the full, final, typeset and author-corrected version of record of the manuscript is available on our site with no access controls, subscription charges or pay-per-view fees (<http://bmjopen.bmj.com>).

If you have any questions on BMJ Open's open peer review process please email [info.bmjopen@bmj.com](mailto:info.bmjopen@bmj.com)

# BMJ Open

**Prospective comparison of acupuncture with sham acupuncture to determine impact on sedation and analgesia in mechanically ventilated critically ill patients (PASSION study): protocol for a randomized controlled trial**

|                               |                                                                                                                                                                                                                                                                                                                                                                                                                                                                                                                                                 |
|-------------------------------|-------------------------------------------------------------------------------------------------------------------------------------------------------------------------------------------------------------------------------------------------------------------------------------------------------------------------------------------------------------------------------------------------------------------------------------------------------------------------------------------------------------------------------------------------|
| Journal:                      | <i>BMJ Open</i>                                                                                                                                                                                                                                                                                                                                                                                                                                                                                                                                 |
| Manuscript ID                 | bmjopen-2021-059741                                                                                                                                                                                                                                                                                                                                                                                                                                                                                                                             |
| Article Type:                 | Protocol                                                                                                                                                                                                                                                                                                                                                                                                                                                                                                                                        |
| Date Submitted by the Author: | 03-Dec-2021                                                                                                                                                                                                                                                                                                                                                                                                                                                                                                                                     |
| Complete List of Authors:     | Zhang, Yuzhuo; Guangzhou University of Chinese Medicine<br>Yang, Guang; Guangzhou University of Chinese Medicine<br>Wei, Jinyi; Guangzhou University of Chinese Medicine<br>Chen, Fangliang; Guangzhou University of Chinese Medicine<br>Zhang, Min-Zhou; Guangzhou University of Chinese Medicine;<br>Guangdong Provincial Hospital of Chinese Medicine, Department of Critical Care Medicine<br>Mao, Shuai; Guangzhou University of Chinese Medicine; Guangdong Provincial Hospital of Chinese Medicine, Department of Critical Care Medicine |
| Keywords:                     | Adult intensive & critical care < ANAESTHETICS, Adult anaesthesia < ANAESTHETICS, Pain management < ANAESTHETICS                                                                                                                                                                                                                                                                                                                                                                                                                                |
|                               |                                                                                                                                                                                                                                                                                                                                                                                                                                                                                                                                                 |

SCHOLARONE™  
Manuscripts

1  
2  
3  
4 **Prospective comparison of acupuncture with sham acupuncture to**  
5 **determine impact on sedation and analgesia in mechanically ventilated**  
6 **critically ill patients (PASSION study): protocol for a randomized**  
7 **controlled trial**  
8  
9  
10  
11  
12  
13  
14

15 Yuzhuo Zhang, Ph.D. <sup>1\*</sup>

16  
17  
18  
19 Guang Yang, M.D. <sup>1,2\*</sup>

20  
21  
22  
23 Jinyi Wei, M.D. <sup>1</sup>

24  
25  
26 Fangliang Chen, M.D. <sup>1</sup>

27  
28  
29  
30 Minzhou Zhang, M.D. <sup>1,2,4Δ</sup>

31  
32  
33  
34 Shuai Mao, M.D. <sup>1,2,4Δ</sup>

35  
36  
37 <sup>1</sup> *Second Clinical College, Guangzhou University of Chinese Medicine, Guangzhou*  
38 *510405, China*

39  
40  
41  
42 <sup>2</sup> *Department of Critical Care Medicine, Guangdong Provincial Hospital of Chinese*  
43 *Medicine, Guangzhou 510120, China*

44  
45  
46  
47 <sup>3</sup> *Guangdong Provincial Branch of National Clinical Research Centre for Chinese*  
48 *Medicine Cardiology, Guangzhou 510120, China*

49  
50  
51  
52  
53  
54  
55 \*The first two authors contribute equally to this article.

56  
57  
58 ΔCorrespondence to:

1  
2  
3  
4 Prof. Shuai MAO  
5

6 Department of Critical Care Medicine,  
7

8  
9 Guangdong Provincial Hospital of Chinese Medicine,  
10

11 Guangzhou 510120, China  
12

13  
14 Phone: 86-20-81887233  
15

16  
17 Fax: 86-20-81867705  
18

19 E-mail: [maoshuai@gzucm.edu.cn](mailto:maoshuai@gzucm.edu.cn)  
20

21  
22 Or Prof. Minzhou Zhang [minzhouzhang@gzucm.edu.cn](mailto:minzhouzhang@gzucm.edu.cn)  
23  
24  
25  
26  
27  
28  
29  
30  
31  
32  
33  
34  
35  
36  
37  
38  
39  
40  
41  
42  
43  
44  
45  
46  
47  
48  
49  
50  
51  
52  
53  
54  
55  
56  
57  
58  
59  
60

## ABSTRACT

**Introduction** Sedation and analgesia are recommended used in the intensive care unit (ICU) to enhance patient comfort and safety, facilitate mechanical ventilation, and reduce oxygen demands. However, the increasing evidence demonstrates that excessive sedation and analgesia might prolong mechanical ventilation and increase costs and mortality. Acupuncture, known to attenuate pain, anxiety, and agitation symptoms, might reduce the duration of mechanical ventilation and drug accumulation through avoiding excessively deep sedation and analgesia.

**Methods and analysis** Prospective, randomized controlled trial (RCT) of 180 adult medical/surgical ICU patients with mechanical ventilation needing sedation at 3 ICUs between December 2021 and December 2022. Patients would be treated with analgesia and sedation to achieve desired target sedation levels (Richmond Agitation Sedation Score of -2 to 1) from enrolment until extubation. Enrolled patients will be randomly assigned in a ratio of 1:1:1 to receive deep needle insertion with combined manual and alternating-mode electrical stimulation on acupoints (AC group), superficial needle insertion without manual stimulation and electrical stimulation on non-acupoints (SAC group), or no acupuncture intervention (NAC group).

The primary outcome is the duration of mechanical ventilation from randomization until patients were free of mechanical ventilation (including noninvasive) without reinstitution for the following 48 hours. Secondary endpoints included the dose of

1  
2  
3  
4 administered sedatives and analgesic at comparable sedation levels throughout the study  
5  
6 period, ICU length of stay, hospital length of stay.  
7  
8

9  
10 **Ethics and dissemination** The trial was approved by the ethics committee at  
11  
12 Guangdong Provincial Hospital of Chinese Medicine. We will publish the study results.  
13  
14

15 **Trial Registration numbers: ChiCTR2100052650**  
16  
17

18  
19 **Keywords:**  
20  
21

22 acupuncture; sedation; analgesia; critically ill patients; nonpharmacological therapy  
23  
24

25 **Word Count: 3805**  
26  
27  
28  
29  
30  
31  
32  
33  
34  
35  
36  
37  
38  
39  
40  
41  
42  
43  
44  
45  
46  
47  
48  
49  
50  
51  
52  
53  
54  
55  
56  
57  
58  
59  
60

### Strengths and limitations of this study

- ◆ Strengths include objective, methods to reduce bias and careful collection of safety data.
- ◆ The result would demonstrate nonpharmacological therapies could be used as adjuncts to sedatives and analgesics for critically ill patients.
- ◆ Limitations are the non-blinded interventions due to the nature of acupuncture.

For peer review only

1  
2  
3  
4  
5  
6  
7  
8  
9  
10  
11  
12  
13  
14  
15  
16  
17  
18  
19  
20  
21  
22  
23  
24  
25  
26  
27  
28  
29  
30  
31  
32  
33  
34  
35  
36  
37  
38  
39  
40  
41  
42  
43  
44  
45  
46  
47  
48  
49  
50  
51  
52  
53  
54  
55  
56  
57  
58  
59  
60

For peer review only



## INTRODUCTION

Sedative and analgesic medications are routinely administered to mechanically ventilated critically ill patients to reduce pain, anxiety, and agitation, as well as to allow patients to tolerate invasive procedures in the intensive care unit (ICU).<sup>1</sup> Opiates are most commonly used as analgesics, while benzodiazepines, propofol, or dexmedetomidine are typically used to prevent or reduce anxiety and agitation.<sup>2</sup> However, overuse of these medications is associated with worsened clinical outcomes, such as prolonged time of mechanical ventilation and hospital length of stay, the increased risk of altered mental status, and even mortality.<sup>3</sup> Thus, reducing the unnecessary dosage of sedative and analgesic medications and their side effects while providing desired sedation has always been a key objective when caring for critically ill patients.

As a therapeutic modality with fewer adverse effects, acupuncture has been used in China and other Asian countries for thousands of years to treat various conditions.<sup>4-6</sup> Studies of acupuncture usually focused on its analgesic effect, such as relieving pain and partly reducing opioid-related side effects during or after surgical procedures.<sup>7-11</sup> Particularly, Centers for Medicare & Medicaid Services (CMS) of USA finalizes a decision to cover acupuncture for chronic low back pain for Medicare beneficiaries from January 2020. Moreover, acupuncture has been demonstrated to reduce sedative demands and improve patient experience during diagnostic endoscopic ultrasound.<sup>12</sup> However, there are few, if any, reports on the effect of acupuncture on reducing excessive sedation and analgesia, especially due to shortening duration of mechanical

1  
2  
3  
4 ventilation and drug accumulation. Furthermore, there is no evidence for an effect of  
5  
6 “true” acupuncture over "sham" acupuncture (superficial needle insertion without  
7  
8 manual stimulation at "non-points" or electrical stimulation) on clinical outcomes in  
9  
10 critically ill patients needing mechanical ventilation.  
11  
12

13  
14  
15 Therefore, the PASSION study is designed to investigate the efficacy of acupuncture on  
16  
17 sedation and analgesia in mechanically ventilated critically ill patients. We are going to  
18  
19 test the hypothesis that acupuncture, as adjunctive therapy to sedation and analgesia  
20  
21 therapies, could reduce the duration of mechanical ventilation, the dose of administered  
22  
23 sedatives and analgesic, and subsequently improve other clinical outcomes for critically  
24  
25 ill patients when compared with sham acupuncture or non-acupuncture.  
26  
27  
28  
29

## 30 **METHODS**

### 31 **Study Design Overview**

32  
33  
34 This is a prospective, parallel-group, controlled trial that will recruit 180 patients with  
35  
36 a computer-generated allocation sequence and centralized randomization at tertiary and  
37  
38 regional ICUs in 3 hospital (Guangdong Provincial Hospital of Chinese Medicine,  
39  
40 Charity Hospital of Guangzhou, University Hospital) in South China. Eligible patients  
41  
42 will be randomly assigned, in a ratio of 1:1:1, to receive deep needle insertion with  
43  
44 combined manual and alternating-mode electrical stimulation on acupoints (AC group,  
45  
46 n =60), superficial needle insertion without manual or electrical stimulation on non-  
47  
48 acupoints (SAC group, n =60) for 30 min/day, or no acupuncture intervention (NAC  
49  
50 group, n =60) .  
51  
52  
53  
54  
55  
56  
57  
58  
59  
60

1  
2  
3  
4 Participants will be assessed the duration of mechanical ventilation, as well as the dose  
5  
6 of administered sedatives and analgesic at comparable sedation levels, from  
7  
8 randomization until patients were free of mechanical ventilation (including noninvasive)  
9  
10 without reinstitution for the following 48 hours. They will be also assessed if  
11  
12 acupuncture could achieve better clinical outcomes than SAC or NAC treatment. The  
13  
14 design of the trial is summarized in Figure 1.  
15  
16  
17  
18  
19

### 20 **Ethical Requirements and Registration**

21  
22  
23 This protocol and statistical analysis plan was approved by the institutional human  
24  
25 Clinical Research Ethical Committee at Guangdong Provincial Hospital of Chinese  
26  
27 Medicine (Guangzhou, China) in October 2021 with permission number ZF2021-144-  
28  
29 01. The PASSION study was registered on Nov 3, 2021 (ClinicalTrials.gov, number  
30  
31 ChiCTR2100052650) and will be conducted following the Declaration of Helsinki from  
32  
33  
34  
35  
36  
37  
38  
39  
40  
41  
42  
43  
44  
45  
46  
47  
48  
49  
50  
51  
52  
53  
54  
55  
56  
57  
58  
59  
60  
December 2021 to December 2022.

Written informed consent will be provided before enrollment voluntarily. Considering  
that patients will be sedated following ICU admission, complete adherence to patient  
consent is deemed impossible. The investigational nature and details of the study,  
together with the possible risks and all the benefits, will be informed to patients or their  
authorized surrogates. Written informed consent will be subsequently obtained from  
either of them. Patients for whom surrogate consent was obtained were asked again to  
provide informed consent once determined to be competent. They can also withdraw  
from the study at any time they wish. Also, the investigator can decide to withdraw a

1  
2  
3  
4 subject from the study for urgent medical reasons. The researcher should complete the  
5  
6 case report form (CRF) and record the reason for dropping out.  
7  
8

## 9 10 **Patients**

11  
12  
13 Patients from medical and surgical ICU, aging from 18 to 80 years, for expected  
14  
15 mechanical ventilation longer than 24 hours, with agitation and/or discomfort after  
16  
17 recovering from drugs used to facilitate endotracheal intubation, requiring sedation and  
18  
19 agitation by continuous intravenous administration deemed by the ICU physician, are  
20  
21 eligible for participation as soon as they or their authorized surrogates are willing to  
22  
23 give informed consent (Table 1).  
24  
25  
26  
27

28  
29 Exclusion criteria include skin lesions near the acupuncture points; coagulopathy  
30  
31 (bleeding time >4 min, thrombocytes <50,000/ $\mu$ l), neurological disease (previous stroke,  
32  
33 cerebral palsy, etc.) that would confound the diagnosis of delirium, active seizures,  
34  
35 severe dementia, relevant psychiatric disorder, hypohepatia with Childs-Pugh class B  
36  
37 or C, second- or third-degree atrioventricular block, alcohol or drug abuse,  
38  
39 benzodiazepine dependency, a moribund state with the planned withdrawal of life  
40  
41 support, family or physician refusal, pregnancy or lactation, currently participated in  
42  
43 any other investigational therapeutic or device trial (Table 1).  
44  
45  
46  
47  
48  
49

## 50 51 **ICU standard treatment**

52  
53  
54 As is standard in each ICU of our study, mechanically ventilated critically ill patients  
55  
56 will be treated in a single treatment room. They will be taken care of by a trained ICU  
57  
58 physician responsible for all treatment decisions, including sedation analgesia  
59  
60

1  
2  
3  
4 management plans made in consultation with the bedside nurses. They will also receive  
5  
6 one-to-one nursing care to adjust the treatment based on a patient's response in time. A  
7  
8 team of medical officers will review patient care every day.  
9  
10

### 11 **Randomization and blinding**

12  
13  
14  
15 Eligible patients will be stratified by participating sites to avoid patient-level  
16  
17 contamination from the systems-level organizational change in sedation practice and,  
18  
19 within each ICU, assigned to the AC, SAC, or NAC group in an equal ratio via  
20  
21 computer-generated randomization. In detail, an independent study coordinator will log  
22  
23 into the central randomization system using a password-protected account and enter  
24  
25 inclusion and exclusion criteria to ensure eligibility. After entering a patient's name and  
26  
27 identification card number, a randomization sequence will be generated in blocks of  
28  
29 varying sizes and stratified by the site under the control of the central computer system.  
30  
31 The random sequence will then be concealed in sealed envelopes and sent to an  
32  
33 acupuncturist from the assigned patient's site by the study coordinator.  
34  
35  
36  
37  
38  
39  
40  
41

42 Allocation of participants will be known to the study coordinator and acupuncturists  
43  
44 who will not be involved in outcome assessment and be required to sign a confidentiality  
45  
46 agreement about patient allocation. All patients will be treated in a single treatment  
47  
48 room. In both AC and SAC groups, patients, bedside nurses, and physicians will be  
49  
50 blinded to which acupuncture method the patients would receive. The data collectors  
51  
52 and the biostatisticians will be masked from the treatment assignment.  
53  
54  
55  
56  
57

### 58 **Acupuncture interventions and procedures**

1  
2  
3  
4 The acupuncture interventions will be developed by a consensus of acupuncture experts  
5  
6 according to the Standards for Reporting of Controlled Trials in Acupuncture  
7  
8 (STRICTA).<sup>13</sup> Patients will be assigned in a ratio of 1:1:1 to AC group (n=60), SAC  
9  
10 group (n=60), NAC group (n=60). Besides, each group shares the same basic Sedation  
11  
12 Analgesia Strategy  
13  
14  
15

16  
17 For patients in the AC group, 8 disposable sterile acupuncture needles (filiform needles  
18  
19 made of stainless steel, Beijing Hanyi Medical Instruments, China) with a length of 40  
20  
21 mm and a diameter of 0.30 mm will be inserted into acupuncture points at Baihui  
22  
23 (DU20), Yintang (EX-HN3), and bilateral acupoints of Shenmen (HT7), Hegu (LI4),  
24  
25 Taichong (LR3) according to the theory of traditional Chinese medicine. The  
26  
27 localization of these points is measured with a unit of *cun*, a traditional Chinese unit of  
28  
29 length. One *cun* of a person is defined as the width of the thumb himself, whereas four  
30  
31 fingers are defined as 3 *cun*. The insertion will be followed by manual stimulation, a  
32  
33 lifting and thrusting technique combined with twirling and rotating the needle sheath to  
34  
35 produce a sensation of soreness, numbness, distention, or radiating. This sensation is  
36  
37 known as “*Deqi*” and is considered to be indicative of effective needling. Then,  
38  
39 alternating-mode electrical stimulation will be given with the parameters: bursts  
40  
41 alternating at 2 Hz and 100 Hz every 3 s, with 10-15 mA intensity inducing no  
42  
43 discomfort and no muscle contraction.  
44  
45  
46  
47  
48  
49  
50  
51  
52

53  
54 For patients in the SAC group, superficial needle insertion with a depth of 2 mm and no  
55  
56 manual stimulation will be performed for 30 min/day. The same sort of needles with the  
57  
58 AC group will be placed 1 cm distant lateral the used acupoints that are not known as  
59  
60

1  
2  
3  
4 AC points. The electrical stimulator will likewise be connected but without electrical  
5  
6 stimulation.  
7  
8

9  
10 Patients in the NAC group will receive no acupuncture-related intervention during the  
11  
12 trial. But they could receive a free 12-session daily acupuncture treatment after  
13  
14 completing the study at their convenience.  
15  
16

17  
18 Each Site will be required to have 2 licensed acupuncturists with more than 3 years of  
19  
20 experience and specialized training in the acupuncture protocols before starting the  
21  
22 study. The acupuncturists will be responsible for the whole acupuncture process but are  
23  
24 not further involved in this study.  
25  
26  
27

### 28 29 **Basic Sedation Analgesia Strategy** 30 31

32  
33 In this study, diagnosis and therapeutic management of agitation and pain will be  
34  
35 prescribed by the physicians responsible for the clinical care of each patient according  
36  
37 to recommended guidelines<sup>14</sup>. An interruptive sedation strategy was used by bedside  
38  
39 nurses, and sedation levels and pain intensity were assessed with the Richmond  
40  
41 Agitation Sedation Scale (RASS)<sup>15 16</sup>, the Behavioral Pain Scale (BPS) ,or the Numeric  
42  
43 Rating Scale (NRS) <sup>17 18</sup> every 4 h in objective to adapt sedatives and analgesics to avoid  
44  
45 overuse. Authorized nurses will titrate infusions, including benzodiazepines, propofol,  
46  
47 and dexmedetomidine for sedatives and opiates for analgesia, instead of bolus dosing to  
48  
49 minimize potential adverse effects.  
50  
51  
52  
53

54  
55  
56 The sedation analgesia strategy is designed to consider pain treatment before increasing  
57  
58 sedatives to minimize the risk of oversedation. The pain will be assessed either by the  
59  
60

1  
2  
3  
4 BPS in patients unable to communicate or by the NRS, a 1-10 numeric rating scale, in  
5  
6 those sufficiently oriented and awake to communicate with the medical staff. Efficacy  
7  
8 of the study analgesics drug will be defined as the ability to achieve a score  $< 3$  in both  
9  
10 of the pain scoring systems above, evaluated by the bedside nurse. Efficacy of the study  
11  
12 sedative drug will be defined as the ability to achieve a sedation score between -2 and  
13  
14 1, set by the patient's medical team using the RASS, a highly reliable and well-validated  
15  
16 sedation scale for use within patients over time in the ICU.  
17  
18  
19  
20  
21

22  
23 Each morning, a daily interruption of sedation (DIS) will be performed at the clinical  
24  
25 medical team's discretion. Major opioid infusions needed for active pain will be  
26  
27 continued. Recommended criteria to interrupt sedation is used: no drug-induced  
28  
29 paralysis, no intracranial hypertension, no myocardial ischemia in the previous 24 h,  
30  
31 primary disease healing in progress, hemodynamic stability, the partial pressure of  
32  
33 arterial oxygen  $\geq 60$  mmHg, the fraction of inspired oxygen  $\leq 50\%$ , and positive end-  
34  
35 expiratory pressure  $\leq 8$  cmH<sub>2</sub>O. The interruption of continuous sedation will be coupled  
36  
37 with an assessment hourly for wakefulness, defined as the RASS score 1 to 4, and the  
38  
39 ability to perform at least 3 of the following requests: eye-opening, tracking, hand  
40  
41 squeezing, and toe moving. With the criteria recommended, patients will be able to pass  
42  
43 the DIS if they can tolerate it for 4 h and awakening enough. Then, a spontaneous  
44  
45 breathing trial (SBT) will immediately be managed.<sup>19</sup> If patients are insufficient for the  
46  
47 DIS, sedatives will be restarted at half the previous dose and then titrated to achieve  
48  
49 patient comfort. DIS will be performed the next morning again.  
50  
51  
52  
53  
54  
55  
56  
57  
58  
59  
60

## Extubation Test



1  
2  
3  
4 Before extubation, patients will be managed with an SBT. During the SBT, without  
5  
6 ventilatory support, patients will be allowed to breathe through a ventilatory circuit with  
7  
8 8cm H<sub>2</sub>O PSV, 0 PEEP, and unchanged FiO<sub>2</sub> from the mechanical ventilation period  
9  
10 leading up to the SBT.<sup>20</sup> Criteria for a successful SBT were: respiratory rate between 8  
11  
12 and 35 breaths/min, arterial oxygen saturation > 88%, less than 20% change in mean  
13  
14 arterial pressure or heart rate, no signs of respiratory distress and acute cardiac  
15  
16 arrhythmia, no use of accessory muscles, no abdominal paradox, absence of sweating,  
17  
18 agitation or impaired vigilance status. Patients pass the SBT if they complete a 60 min  
19  
20 trial with the success criteria, and extubation will be implemented 6 h later. Patients who  
21  
22 fail the SBT will be ventilated immediately with the ventilator settings used before the  
23  
24 trial, and sedatives will be restarted at half the previous dose and then titrated to achieve  
25  
26 patient comfort. The SBT will be managed the next morning again. Extubation will be  
27  
28 implemented following standardized criteria, but the decision to extubate remains upon  
29  
30 the authority of the attending physician in charge of the patient. Researchers did not  
31  
32 participate in decisions to extubate patients.  
33  
34  
35  
36  
37  
38  
39  
40  
41  
42

43 The clinical research team should make sure that the overall research protocol,  
44  
45 especially the criteria for sedation and definition of successful SBT, is strictly followed  
46  
47 by the bedside nurse and medical teams in charge of the patients. Related information  
48  
49 will be reported on the Clinical Research Form.  
50  
51  
52  
53

### 54 **Assessing Delirium**

55  
56  
57  
58  
59  
60

1  
2  
3  
4 Delirium will be measured by the bedside nurses according to the Confusion  
5  
6 Assessment Method for the ICU (CAM-ICU) until out of ICU or hospital discharge.<sup>21</sup>

7  
8  
9 Patients will be considered in this state if they have a RASS score  $\geq -3$  and a positive  
10  
11 CAM-ICU, defined as positive with the symptoms of feature 1, feature 2, and either  
12  
13 feature 3 or feature 4 as follows:

14  
15  
16  
17 Feature 1: acute onset of mental status change or fluctuation of mental status

18  
19  
20 Feature 2: inattention

21  
22  
23 Feature 3: disorganized thinking

24  
25  
26 Feature 4: altered level of consciousness

### 27 28 29 30 **Adverse Event Monitoring**

31  
32  
33 Adverse events will also be defined a priori and prospectively monitored. Adverse  
34  
35 events associated with acupuncture include bleeding, hematoma, and local infection.

36  
37  
38 Adverse events related to sedation and analgesia include inadequate pain and sedation  
39  
40 management (either pain score  $> 4$  and RASS  $> 1$  for 2 consecutive hours or pain and  
41  
42 agitation assumed present if receiving neuromuscular blockade), clinically significant  
43  
44 iatrogenic withdrawal. Adverse events associated with mechanical ventilation include  
45  
46 accidental removal of medical devices, extubation failure (reintubation within 24 hours),  
47  
48 pressure ulcers, catheter-associated bloodstream infections, ventilator-associated  
49  
50 pneumonia. Every day, study personnel will monitor and assess the seriousness of all  
51  
52 adverse events and document all details to determine whether or not any of the events  
53  
54 would be related to acupuncture interventions or the study procedure. A report of all  
55  
56  
57  
58  
59  
60

1  
2  
3  
4 serious, unexpected, and study-related adverse events will be presented to an  
5  
6 independent data and safety monitoring board and the institutional review board within  
7  
8  
9 7 days of occurrence.  
10

## 11 **Outcomes and Data Collection**

12  
13  
14  
15 The primary outcome is the duration of mechanical ventilation, defined as the time from  
16  
17 randomization to successful extubation without reinstitution for the following 48 hours.  
18

19  
20 The secondary outcomes will include the dose of administered sedatives and opiate  
21  
22 (absolute value as well as indexed value [total drug in mg/kg ÷ total number of hours  
23  
24 from the start of infusion to its ultimate discontinuation]) at comparable clinically  
25  
26 individualized target sedation goals throughout the study period, the duration of ICU  
27  
28 length of stay, and hospital length of stay. Additional outcomes include the prevalence  
29  
30 and days of delirium in ICU, mortality in ICU, and within 28 days after randomization.  
31  
32  
33

34  
35  
36  
37 The day of extubation was considered as the day of death for patients who died while  
38  
39 still intubated. Censoring for ICU or hospital length analyses occurred at the time of  
40  
41 death or study withdrawal. The number of ventilator free days at 28 days is defined as  
42  
43 days alive and not using mechanical ventilation between days 1 and 28. For the 28-day  
44  
45 mortality analyses, patients were censored at the time of the last contact alive or at 28  
46  
47 days from enrollment, whichever was first.  
48  
49  
50

51  
52  
53 Baseline demographic data will be collected from the patients' record by the medical  
54  
55 team, including the reason for ICU admission, Acute Physiology and Chronic Health  
56  
57 Evaluation (APACHE) II scores and diagnostic classification, Sequential Organ Failure  
58  
59 Evaluation (APACHE) II scores and diagnostic classification, Sequential Organ Failure  
60

1  
2  
3  
4 Assessment (SOFA) scores, hematological and blood chemistry data, and clinical data  
5  
6 (detailed information of sedative and analgesic medications administered to the patients  
7  
8 before randomization, cardiac safety profile including electrocardiograms and serum  
9  
10 troponins, and liver function profile including serum bilirubin and glutamate pyruvate  
11  
12 transaminase, etc.). Vital signs such as blood pressure, heart rate, heart rhythm,  
13  
14 temperature, and oxygen saturations will be recorded and collected by the bedside  
15  
16 nurses, as well as scores of RASS, BPS, NRS, and CAM-ICU. Moreover, adverse events  
17  
18 data will also be collected from patients' records.  
19  
20  
21  
22  
23

### 24 25 **Patient and public involvement statement**

26  
27  
28 There was no patient or public involvement in the design, conduct, reporting or  
29  
30 dissemination plans of this research.  
31  
32

### 33 34 **Statistical Analysis**

35  
36  
37 Statistical power was estimated using the reduction in duration of mechanical  
38  
39 ventilation as the primary outcome. According to Carrasco and colleagues, the mean  
40  
41 ( $\pm$ standard deviation) time for current sedation was  $54.7 \pm 12.3$  hours.<sup>22</sup> We calculated  
42  
43 that a sample size of 48 patients in each group would provide a power of 90% to detect  
44  
45 a 15% relative reduction in intubation time at a two-sided significance level of 0.05.  
46  
47  
48 With a dropout rate of 20%, the estimated sample size will be 60 patients per group.  
49  
50  
51 Thus a total of 180 patients will be enrolled for the study.  
52  
53

54  
55  
56 The per-protocol set (PPS), including patients who completed the study without having  
57  
58 major protocol violations, is used for the evaluation of clinical outcomes. While the full  
59  
60

1  
2  
3  
4 analysis set (FAS), determined according to the intention-to-treat population (ITT) who  
5  
6 underwent randomization except for those who are excluded after randomization, is not  
7  
8 only used for evaluation of clinical outcomes but also baseline characteristics to measure  
9  
10 the balance of the three groups before intervention. Missing data will be replaced  
11  
12 according to the principle of multiple imputation. Continuous data will be presented as  
13  
14 median and interquartile range, while categorical data as number and proportions.  
15  
16 Normal distribution will be checked by the Kolmogorov test. For continuous variables,  
17  
18 normal distributed data will be compared using one-way analysis of variance among  
19  
20 three groups, and independent Student's t-test between any of the two groups. While the  
21  
22 comparison of non-normally distributed parameters among three groups will be applied  
23  
24 by ANOVA (Kruska Wallis), and then Mann-Whitney U-test between any of the two  
25  
26 groups. Categorical data will be compared by using Fisher's exact test or the chi-square  
27  
28 test. Other factors that might affect the efficacy will be considered as co-variants for  
29  
30 covariance analysis or Cox proportional hazards regression model.  $P \leq 0.05$  will be  
31  
32 considered to indicate statistical significance. All analyses will be done with R statistical  
33  
34 software, version 4.0.2.  
35  
36  
37  
38  
39  
40  
41  
42  
43  
44  
45

## 46 **DISCUSSION**

47  
48  
49 This prospective trial is designed to provide evidence on the beneficial effect of  
50  
51 acupuncture on reducing the duration of mechanical ventilation, avoiding excessive  
52  
53 sedation and analgesia, as well as improving clinical outcomes in sedating mechanically  
54  
55 ventilated ICU patients.  
56  
57  
58  
59  
60

1  
2  
3  
4 General analgesia and sedation are necessary for mechanically ventilated critically ill  
5  
6 patients. However, overuse of sedative and analgesic medications may cause varying  
7  
8 degrees of side effects, like respiratory drive reduction.<sup>23</sup> These side effects are  
9  
10 associated with worsened clinical outcomes, such as a prolonged time of mechanical  
11  
12 ventilation and hospital length of stay, an increased risk of delirium, and even  
13  
14 mortality.<sup>24 25</sup> With many sophisticated attempts to mitigate this clinical problem, it has  
15  
16 thus far been identified that optimizing analgesia and sedation strategy is able to prevent  
17  
18 excessive sedation and analgesia and improve the clinical outcome by reducing the  
19  
20 duration and dosage of sedative and analgesic medications.<sup>26-28</sup> Thus, it become a key  
21  
22 objective to formulate an intensive sedative and analgesic medications strategy when  
23  
24 caring for critically ill patients.  
25  
26  
27  
28  
29  
30  
31  
32

33 The rationale for evaluating the ability of acupuncture on this subject is based on  
34  
35 research findings that acupuncture could manage pain relief and facilitate opioid  
36  
37 tapering by increasing the  $\mu$ -opioid receptor binding ability and the opioid peptides  
38  
39 release.<sup>29 30</sup> According to the meta-analysis of electroacupuncture on pain relief, the  
40  
41 dosage of analgesics needed in AC group was lower than that in NAC group [MD=-  
42  
43 6.33,95%CI (-7.20,-5.46), Z=14.24,P<0.00001] (Figure 2).<sup>31-35</sup> Meanwhile,  
44  
45 acupuncture, without adverse effect, has been shown to exert sedation effects in various  
46  
47 medical conditions. As it shown in meta-analysis, the bispectral index (BIS) values in  
48  
49 AC group was also lower than that in NAC group [MD=-9.98,95%CI(-10.54,-  
50  
51 9.42),Z=34.84,P<0.00001] (Figure 3).<sup>33 36-38</sup> With these promising results, it is  
52  
53  
54  
55  
56  
57  
58  
59  
60

1  
2  
3  
4 meaningful to assess acupuncture as a potential analgesia and sedation strategy in  
5  
6 ameliorating the clinical outcomes in mechanically ventilated critically ill patients.  
7  
8

9  
10 RCT has been recognized as the gold standard for clinical trials since the late 20th  
11  
12 century.<sup>39</sup> Another important designed technique to improve the quality of clinical trials  
13  
14 is blinding. Over the past several decades, RCT and blinding have been used to avoid  
15  
16 bias (selection bias, performance bias, and ascertainment bias) in clinical trials and  
17  
18 improve the reliability of effects assessment. Sham acupuncture, aiming to blind the  
19  
20 participants and control therapeutic components, is designed as a placebo control.  
21  
22 However, this acupuncture technique is relatively difficult to fabricate because it should  
23  
24 be both biologically inert and psychologically indistinguishable.<sup>40</sup> Even previous  
25  
26 experience of acupuncture feeling might impact the present perception of verum and  
27  
28 sham acupuncture intervention.  
29  
30  
31  
32  
33  
34  
35

36  
37 In PASSION study, we utilize a rigorous set of methods to minimize bias, such as  
38  
39 computer-generated central randomization, parallel control design, and statistical  
40  
41 analysis according to the intent-to-treat principle. In control design, the superficial  
42  
43 needle insertion without manual or electrical stimulation at non-point is applied to  
44  
45 simulate deep skin penetration in the SAC group, which is used as the most predominant  
46  
47 type of sham electropuncture method to ensure blinding according to the published  
48  
49 literature.<sup>41</sup> However, a few studies reported that superficial needle insertion at non-  
50  
51 acupoints might not be physiologically inert since the locations of points are nearby true  
52  
53 acupoints.<sup>42 43</sup> Moreover, researchers found that even mechanical non-penetration can  
54  
55 evoke slight acupressure effects and physiological activity.<sup>44</sup> Both of these factors will  
56  
57  
58  
59  
60

1  
2  
3  
4 affect the effect assessment of acupuncture. Thus, the NA group, avoiding all  
5  
6 therapeutic components, is designed to clarify if the sham acupuncture could be  
7  
8 regarded as physiologically inert, as well as compared with the results of the AC group.  
9  
10

11  
12 A potential limitation of this trial is blinding. Given the nature of acupuncture, the  
13  
14 patients and members of the medical team in the NA group are impossible to be blinded  
15  
16 throughout the entire duration of this trial. However, adequate measures will be taken  
17  
18 to put other people in a masked state. We will formulate a set of isolation and secrecy  
19  
20 strategies for the study coordinator and acupuncturists to achieve satisfactory blinding  
21  
22 levels in treatment administration. Thus, in both AC and SAC groups, patients and their  
23  
24 medical team members will be blinded to the patients' acupuncture method. The data  
25  
26 collectors and the biostatisticians will also be masked of the treatment assignment.  
27  
28  
29  
30  
31

32  
33 The PASSION study is designed to demonstrate the efficacy of acupuncture on sedation  
34  
35 and analgesia in mechanically ventilated critically ill patients. We expect the finding  
36  
37 would provide evidence-based recommendations for acupuncture use for sedation and  
38  
39 analgesia in critically ill patients with mechanical ventilation.  
40  
41  
42  
43  
44  
45  
46  
47

#### 48 **FUNDING STATEMENT:**

49  
50 This study was funded by National Science Foundation (grant No.  
51  
52 81703877&82074216&82004135), Science and Technology Planning Project of  
53  
54 Guangzhou (202102010301), a Featured Innovative Project from Guangdong Provincial  
55  
56 Universities (2019KTSCX029), Young Talents Support Project from China Association  
57  
58  
59  
60



1  
2  
3  
4 of Chinese Medicine (2019-QNRC2-C06), Team of prevention and treatment of acute  
5  
6 myocardial infarction with Chinese medicine (2019KCXTD009), Foundation of  
7  
8 Guangdong Province of CM (20211187&20201142).  
9  
10

## 11 **DISCLAIMER**

12  
13  
14 The sponsors have had no role in the project development, in the collection of data, in  
15  
16 the preparation of this manuscript, nor the decision to publish. The researchers have  
17  
18 complete independence from the sources of funding in all aspects  
19  
20  
21 of this study.  
22  
23

## 24 **PATIENT CONSENT FOR PUBLICATION**

25  
26  
27 Consent obtained from parent(s)/guardian(s).  
28  
29

## 30 **PROVENANCE AND PEER REVIEW**

31  
32  
33 Not commissioned; externally peer reviewed.  
34  
35

## 36 **ETHICS AND DISSEMINATION**

37  
38  
39  
40 The study was reviewed and approved by Ethics Committee of Guangdong Province  
41  
42 Hospital of Chinese Medicine at Guangzhou University of Chinese Medicine (ZF2021-  
43  
44 144-01) and performed in accordance with Guide for the Care and Use of Laboratory  
45  
46 Animals published by the US National Institutes of Health (publication No. 85-23,  
47  
48 revised 1996).  
49  
50  
51

## 52 **COMPETING INTERESTS STATEMENT**

53  
54  
55 All authors declare that they have no conflict of interest.  
56  
57  
58

## 59 **AUTHORS' CONTRIBUTIONS**

1  
2  
3  
4 YZ & SM drafted this manuscript; GY, JW & FC made statistical analysis; MZZ made  
5  
6 a critical revision of the manuscript and contributed to the rationalization of the study.  
7

8  
9 All authors read and approved the final manuscript.  
10

## 11 **REFERENCE**

12  
13  
14  
15  
16  
17  
18  
19  
20  
21  
22  
23  
24  
25  
26  
27  
28  
29  
30  
31  
32  
33  
34  
35  
36  
37  
38  
39  
40  
41  
42  
43  
44  
45  
46  
47  
48  
49  
50  
51  
52  
53  
54  
55  
56  
57  
58  
59  
60

For peer review only

- 1  
2  
3  
4 1. Coursin DB, Skrobik Y. What Is Safe Sedation in the ICU? *New England Journal of Medicine* 2019;380(26):2577-78.  
5  
6 doi: 10.1056/NEJMe1906522  
7  
8
- 9 2. Subramaniam B, Shankar P, Shaefi S, et al. Effect of Intravenous Acetaminophen vs Placebo Combined With Propofol  
10  
11 or Dexmedetomidine on Postoperative Delirium Among Older Patients Following Cardiac Surgery The  
12  
13 DEXACET Randomized Clinical Trial. *Jama-Journal of the American Medical Association* 2019;321(7):686-96.  
14  
15  
16  
17 doi: 10.1001/jama.2019.0234  
18
- 19 3. Shelton KT, Qu J, Bilotta F, et al. Minimizing ICU Neurological Dysfunction with Dexmedetomidine-induced Sleep  
20  
21 (MINDDS): protocol for a randomised, double-blind, parallel-arm, placebo-controlled trial. *BMJ Open*  
22  
23  
24 2018;8(4):e020316. doi: 10.1136/bmjopen-2017-020316 [published Online First: 2018/04/22]  
25  
26
- 27 4. Zhao L, Li D, Zheng H, et al. Acupuncture as Adjunctive Therapy for Chronic Stable Angina: A Randomized Clinical  
28  
29  
30  
31  
32  
33  
34  
35  
36  
37  
38  
39  
40  
41  
42  
43  
44  
45  
46  
47  
48  
49  
50  
51  
52  
53  
54  
55  
56  
57  
58  
59  
60
6. Pei W, Peng R, Gu Y, et al. Research trends of acupuncture therapy on insomnia in two decades (from 1999 to 2018): a  
61  
62  
63  
64  
65  
66  
67  
68  
69  
70  
71  
72  
73  
74  
75  
76  
77  
78  
79  
80  
81  
82  
83  
84  
85  
86  
87  
88  
89  
90  
91  
92  
93  
94  
95  
96  
97  
98  
99  
100  
101  
102  
103  
104  
105  
106  
107  
108  
109  
110  
111  
112  
113  
114  
115  
116  
117  
118  
119  
120  
121  
122  
123  
124  
125  
126  
127  
128  
129  
130  
131  
132  
133  
134  
135  
136  
137  
138  
139  
140  
141  
142  
143  
144  
145  
146  
147  
148  
149  
150  
151  
152  
153  
154  
155  
156  
157  
158  
159  
160  
161  
162  
163  
164  
165  
166  
167  
168  
169  
170  
171  
172  
173  
174  
175  
176  
177  
178  
179  
180  
181  
182  
183  
184  
185  
186  
187  
188  
189  
190  
191  
192  
193  
194  
195  
196  
197  
198  
199  
200  
201  
202  
203  
204  
205  
206  
207  
208  
209  
210  
211  
212  
213  
214  
215  
216  
217  
218  
219  
220  
221  
222  
223  
224  
225  
226  
227  
228  
229  
230  
231  
232  
233  
234  
235  
236  
237  
238  
239  
240  
241  
242  
243  
244  
245  
246  
247  
248  
249  
250  
251  
252  
253  
254  
255  
256  
257  
258  
259  
260  
261  
262  
263  
264  
265  
266  
267  
268  
269  
270  
271  
272  
273  
274  
275  
276  
277  
278  
279  
280  
281  
282  
283  
284  
285  
286  
287  
288  
289  
290  
291  
292  
293  
294  
295  
296  
297  
298  
299  
300  
301  
302  
303  
304  
305  
306  
307  
308  
309  
310  
311  
312  
313  
314  
315  
316  
317  
318  
319  
320  
321  
322  
323  
324  
325  
326  
327  
328  
329  
330  
331  
332  
333  
334  
335  
336  
337  
338  
339  
340  
341  
342  
343  
344  
345  
346  
347  
348  
349  
350  
351  
352  
353  
354  
355  
356  
357  
358  
359  
360  
361  
362  
363  
364  
365  
366  
367  
368  
369  
370  
371  
372  
373  
374  
375  
376  
377  
378  
379  
380  
381  
382  
383  
384  
385  
386  
387  
388  
389  
390  
391  
392  
393  
394  
395  
396  
397  
398  
399  
400  
401  
402  
403  
404  
405  
406  
407  
408  
409  
410  
411  
412  
413  
414  
415  
416  
417  
418  
419  
420  
421  
422  
423  
424  
425  
426  
427  
428  
429  
430  
431  
432  
433  
434  
435  
436  
437  
438  
439  
440  
441  
442  
443  
444  
445  
446  
447  
448  
449  
450  
451  
452  
453  
454  
455  
456  
457  
458  
459  
460  
461  
462  
463  
464  
465  
466  
467  
468  
469  
470  
471  
472  
473  
474  
475  
476  
477  
478  
479  
480  
481  
482  
483  
484  
485  
486  
487  
488  
489  
490  
491  
492  
493  
494  
495  
496  
497  
498  
499  
500  
501  
502  
503  
504  
505  
506  
507  
508  
509  
510  
511  
512  
513  
514  
515  
516  
517  
518  
519  
520  
521  
522  
523  
524  
525  
526  
527  
528  
529  
530  
531  
532  
533  
534  
535  
536  
537  
538  
539  
540  
541  
542  
543  
544  
545  
546  
547  
548  
549  
550  
551  
552  
553  
554  
555  
556  
557  
558  
559  
560  
561  
562  
563  
564  
565  
566  
567  
568  
569  
570  
571  
572  
573  
574  
575  
576  
577  
578  
579  
580  
581  
582  
583  
584  
585  
586  
587  
588  
589  
590  
591  
592  
593  
594  
595  
596  
597  
598  
599  
600  
601  
602  
603  
604  
605  
606  
607  
608  
609  
610  
611  
612  
613  
614  
615  
616  
617  
618  
619  
620  
621  
622  
623  
624  
625  
626  
627  
628  
629  
630  
631  
632  
633  
634  
635  
636  
637  
638  
639  
640  
641  
642  
643  
644  
645  
646  
647  
648  
649  
650  
651  
652  
653  
654  
655  
656  
657  
658  
659  
660  
661  
662  
663  
664  
665  
666  
667  
668  
669  
670  
671  
672  
673  
674  
675  
676  
677  
678  
679  
680  
681  
682  
683  
684  
685  
686  
687  
688  
689  
690  
691  
692  
693  
694  
695  
696  
697  
698  
699  
700  
701  
702  
703  
704  
705  
706  
707  
708  
709  
710  
711  
712  
713  
714  
715  
716  
717  
718  
719  
720  
721  
722  
723  
724  
725  
726  
727  
728  
729  
730  
731  
732  
733  
734  
735  
736  
737  
738  
739  
740  
741  
742  
743  
744  
745  
746  
747  
748  
749  
750  
751  
752  
753  
754  
755  
756  
757  
758  
759  
760  
761  
762  
763  
764  
765  
766  
767  
768  
769  
770  
771  
772  
773  
774  
775  
776  
777  
778  
779  
780  
781  
782  
783  
784  
785  
786  
787  
788  
789  
790  
791  
792  
793  
794  
795  
796  
797  
798  
799  
800  
801  
802  
803  
804  
805  
806  
807  
808  
809  
810  
811  
812  
813  
814  
815  
816  
817  
818  
819  
820  
821  
822  
823  
824  
825  
826  
827  
828  
829  
830  
831  
832  
833  
834  
835  
836  
837  
838  
839  
840  
841  
842  
843  
844  
845  
846  
847  
848  
849  
850  
851  
852  
853  
854  
855  
856  
857  
858  
859  
860  
861  
862  
863  
864  
865  
866  
867  
868  
869  
870  
871  
872  
873  
874  
875  
876  
877  
878  
879  
880  
881  
882  
883  
884  
885  
886  
887  
888  
889  
890  
891  
892  
893  
894  
895  
896  
897  
898  
899  
900  
901  
902  
903  
904  
905  
906  
907  
908  
909  
910  
911  
912  
913  
914  
915  
916  
917  
918  
919  
920  
921  
922  
923  
924  
925  
926  
927  
928  
929  
930  
931  
932  
933  
934  
935  
936  
937  
938  
939  
940  
941  
942  
943  
944  
945  
946  
947  
948  
949  
950  
951  
952  
953  
954  
955  
956  
957  
958  
959  
960  
961  
962  
963  
964  
965  
966  
967  
968  
969  
970  
971  
972  
973  
974  
975  
976  
977  
978  
979  
980  
981  
982  
983  
984  
985  
986  
987  
988  
989  
990  
991  
992  
993  
994  
995  
996  
997  
998  
999  
1000  
1001  
1002  
1003  
1004  
1005  
1006  
1007  
1008  
1009  
1010  
1011  
1012  
1013  
1014  
1015  
1016  
1017  
1018  
1019  
1020  
1021  
1022  
1023  
1024  
1025  
1026  
1027  
1028  
1029  
1030  
1031  
1032  
1033  
1034  
1035  
1036  
1037  
1038  
1039  
1040  
1041  
1042  
1043  
1044  
1045  
1046  
1047  
1048  
1049  
1050  
1051  
1052  
1053  
1054  
1055  
1056  
1057  
1058  
1059  
1060  
1061  
1062  
1063  
1064  
1065  
1066  
1067  
1068  
1069  
1070  
1071  
1072  
1073  
1074  
1075  
1076  
1077  
1078  
1079  
1080  
1081  
1082  
1083  
1084  
1085  
1086  
1087  
1088  
1089  
1090  
1091  
1092  
1093  
1094  
1095  
1096  
1097  
1098  
1099  
1100  
1101  
1102  
1103  
1104  
1105  
1106  
1107  
1108  
1109  
1110  
1111  
1112  
1113  
1114  
1115  
1116  
1117  
1118  
1119  
1120  
1121  
1122  
1123  
1124  
1125  
1126  
1127  
1128  
1129  
1130  
1131  
1132  
1133  
1134  
1135  
1136  
1137  
1138  
1139  
1140  
1141  
1142  
1143  
1144  
1145  
1146  
1147  
1148  
1149  
1150  
1151  
1152  
1153  
1154  
1155  
1156  
1157  
1158  
1159  
1160  
1161  
1162  
1163  
1164  
1165  
1166  
1167  
1168  
1169  
1170  
1171  
1172  
1173  
1174  
1175  
1176  
1177  
1178  
1179  
1180  
1181  
1182  
1183  
1184  
1185  
1186  
1187  
1188  
1189  
1190  
1191  
1192  
1193  
1194  
1195  
1196  
1197  
1198  
1199  
1200  
1201  
1202  
1203  
1204  
1205  
1206  
1207  
1208  
1209  
1210  
1211  
1212  
1213  
1214  
1215  
1216  
1217  
1218  
1219  
1220  
1221  
1222  
1223  
1224  
1225  
1226  
1227  
1228  
1229  
1230  
1231  
1232  
1233  
1234  
1235  
1236  
1237  
1238  
1239  
1240  
1241  
1242  
1243  
1244  
1245  
1246  
1247  
1248  
1249  
1250  
1251  
1252  
1253  
1254  
1255  
1256  
1257  
1258  
1259  
1260  
1261  
1262  
1263  
1264  
1265  
1266  
1267  
1268  
1269  
1270  
1271  
1272  
1273  
1274  
1275  
1276  
1277  
1278  
1279  
1280  
1281  
1282  
1283  
1284  
1285  
1286  
1287  
1288  
1289  
1290  
1291  
1292  
1293  
1294  
1295  
1296  
1297  
1298  
1299  
1300  
1301  
1302  
1303  
1304  
1305  
1306  
1307  
1308  
1309  
1310  
1311  
1312  
1313  
1314  
1315  
1316  
1317  
1318  
1319  
1320  
1321  
1322  
1323  
1324  
1325  
1326  
1327  
1328  
1329  
1330  
1331  
1332  
1333  
1334  
1335  
1336  
1337  
1338  
1339  
1340  
1341  
1342  
1343  
1344  
1345  
1346  
1347  
1348  
1349  
1350  
1351  
1352  
1353  
1354  
1355  
1356  
1357  
1358  
1359  
1360  
1361  
1362  
1363  
1364  
1365  
1366  
1367  
1368  
1369  
1370  
1371  
1372  
1373  
1374  
1375  
1376  
1377  
1378  
1379  
1380  
1381  
1382  
1383  
1384  
1385  
1386  
1387  
1388  
1389  
1390  
1391  
1392  
1393  
1394  
1395  
1396  
1397  
1398  
1399  
1400  
1401  
1402  
1403  
1404  
1405  
1406  
1407  
1408  
1409  
1410  
1411  
1412  
1413  
1414  
1415  
1416  
1417  
1418  
1419  
1420  
1421  
1422  
1423  
1424  
1425  
1426  
1427  
1428  
1429  
1430  
1431  
1432  
1433  
1434  
1435  
1436  
1437  
1438  
1439  
1440  
1441  
1442  
1443  
1444  
1445  
1446  
1447  
1448  
1449  
1450  
1451  
1452  
1453  
1454  
1455  
1456  
1457  
1458  
1459  
1460  
1461  
1462  
1463  
1464  
1465  
1466  
1467  
1468  
1469  
1470  
1471  
1472  
1473  
1474  
1475  
1476  
1477  
1478  
1479  
1480  
1481  
1482  
1483  
1484  
1485  
1486  
1487  
1488  
1489  
1490  
1491  
1492  
1493  
1494  
1495  
1496  
1497  
1498  
1499  
1500  
1501  
1502  
1503  
1504  
1505  
1506  
1507  
1508  
1509  
1510  
1511  
1512  
1513  
1514  
1515  
1516  
1517  
1518  
1519  
1520  
1521  
1522  
1523  
1524  
1525  
1526  
1527  
1528  
1529  
1530  
1531  
1532  
1533  
1534  
1535  
1536  
1537  
1538  
1539  
1540  
1541  
1542  
1543  
1544  
1545  
1546  
1547  
1548  
1549  
1550  
1551  
1552  
1553  
1554  
1555  
1556  
1557  
1558  
1559  
1560  
1561  
1562  
1563  
1564  
1565  
1566  
1567  
1568  
1569  
1570  
1571  
1572  
1573  
1574  
1575  
1576  
1577  
1578  
1579  
1580  
1581  
1582  
1583  
1584  
1585  
1586  
1587  
1588  
1589  
1590  
1591  
1592  
1593  
1594  
1595  
1596  
1597  
1598  
1599  
1600  
1601  
1602  
1603  
1604  
1605  
1606  
1607  
1608  
1609  
1610  
1611  
1612  
1613  
1614  
1615  
1616  
1617  
1618  
1619  
1620  
1621  
1622  
1623  
1624  
1625  
1626  
1627  
1628  
1629  
1630  
1631  
1632  
1633  
1634  
1635  
1636  
1637  
1638  
1639  
1640  
1641  
1642  
1643  
1644  
1645  
1646  
1647  
1648  
1649  
1650  
1651  
1652  
1653  
1654  
1655  
1656  
1657  
1658  
1659  
1660  
1661  
1662  
1663  
1664  
1665  
1666  
1667  
1668  
1669  
1670  
1671  
1672  
1673  
1674  
1675  
1676  
1677  
1678  
1679  
1680  
1681  
1682  
1683  
1684  
1685  
1686  
1687  
1688  
1689  
1690  
1691  
1692  
1693  
1694  
1695  
1696  
1697  
1698  
1699  
1700  
1701  
1702  
1703  
1704  
1705  
1706  
1707  
1708  
1709  
1710  
1711  
1712  
1713  
1714  
1715  
1716  
1717  
1718  
1719  
1720  
1721  
1722  
1723  
1724  
1725  
1726  
1727  
1728  
1729  
1730  
1731  
1732  
1733  
1734  
1735  
1736  
1737  
1738  
1739  
1740  
1741  
1742  
1743  
1744  
1745  
1746  
1747  
1748  
1749  
1750  
1751  
1752  
1753  
1754  
1755  
1756  
1757  
1758  
1759  
1760  
1761  
1762  
1763  
1764  
1765  
1766  
1767  
1768  
1769  
1770  
1771  
1772  
1773  
1774  
1775  
1776  
1777  
1778  
1779  
1780  
1781  
1782  
1783  
1784  
1785  
1786  
1787  
1788  
1789  
1790  
1791  
1792  
1793  
1794  
1795  
1796  
1797  
1798  
1799  
1800  
1801  
1802  
1803  
1804  
1805  
1806  
1807  
1808  
1809  
1810  
1811  
1812  
1813  
1814  
1815  
1816  
1817  
1818  
1819  
1820  
1821  
1822  
1823  
1824  
1825  
1826  
1827  
1828  
1829  
1830  
1831  
1832  
1833  
1834  
1835  
1836  
1837  
1838  
1839  
1840  
1841  
1842  
1843  
1844  
1845  
1846  
1847  
1848  
1849  
1850  
1851  
1852  
1853  
1854  
1855  
1856  
1857  
1858  
1859  
1860  
1861  
1862  
1863  
1864  
1865  
1866  
1867  
1868  
1869  
1870  
1871  
1872  
1873  
1874  
1875  
1876  
1877  
1878  
1879  
1880  
1881  
1882  
1883  
1884  
1885  
1886  
1887  
1888  
1889  
1890  
1891  
1892  
1893  
1894  
1895  
1896  
1897  
1898  
1899  
1900  
1901  
1902  
1903  
1904  
1905  
1906  
1907  
1908  
1909  
1910  
1911  
1912  
1913  
1914  
1915  
1916  
1917  
1918  
1919  
1920  
1921  
1922  
1923  
1924  
1925  
1926  
1927  
1928  
1929  
1930  
1931  
1932  
1933  
1934  
1935  
1936  
1937  
1938  
1939  
1940  
1941  
1942  
1943  
1944  
1945  
1946  
1947  
1948  
1949  
1950  
1951  
1952  
1953  
1954  
1955  
1956  
1957  
1958  
1959  
1960  
1961  
1962  
1963  
1964  
1965  
1966  
1967  
1968  
1969  
1970  
1971  
1972  
1973  
1974  
1975  
1976  
1977  
1978  
1979  
1980  
1981  
1982  
1983  
1984  
1985  
1986  
1987  
1988  
1989  
1990  
1991  
1992  
1993  
1994  
1995  
1996  
1997  
1998  
1999  
2000  
2001  
2002  
2003  
2004  
2005  
2006  
2007  
2008  
2009  
2010  
2011  
2012  
2013  
2014  
2015  
2016  
2017  
2018  
2019  
2020  
2021  
2022  
2023  
2024  
2025  
2026  
2027  
2028  
2029  
2030  
2031  
2032  
2033  
2034  
2035  
2036  
2037  
2038  
2039  
2040  
2041  
2042  
2043  
2044  
2045  
2046  
2047  
2048  
2049  
2050  
2051  
2052  
2053  
2054  
2055  
2056  
2057  
2058  
2059  
2060  
2061  
2062  
2063  
2064  
2065  
2066  
2067  
2068  
2069  
2070  
2071  
2072  
2073  
2074  
2075  
2076  
2077  
2078  
2079  
2080  
2081  
2082  
2083  
2084  
2085  
2086  
2087  
2088  
2089  
2090  
2091  
2092  
2093  
2094  
2095  
2096  
2097  
2098  
2099  
2100  
2101  
2102  
2103  
2104  
2105  
2106  
2107  
2108  
2109  
2110  
2111  
2112  
2113  
2114  
2115  
2116  
2117  
2118  
2119  
2120  
2121  
2122  
2123  
2124  
2125  
2126  
2127  
2128  
2129  
2130  
2131  
2132  
2133  
2134  
2135  
2136  
2137  
2138  
2139  
2140  
2141  
2142  
2143  
2144  
2145  
2146  
2147  
2148  
2149  
2150  
2151  
2152  
2153  
2154  
2155  
2156  
2157  
2158  
2159  
2160  
2161  
2162  
2163  
2164

- 1  
2  
3  
4 9. Manheimer E, Cheng K, Wieland LS, et al. Acupuncture for hip osteoarthritis. *Cochrane Database of Systematic Reviews*  
5  
6 2018(5):CD013010. doi: 10.1002/14651858.Cd013010  
7  
8  
9 10. Dingemann J, Plewig B, Baumann I, et al. Acupuncture in posttonsillectomy pain A prospective, double-blinded,  
10  
11 randomized, controlled trial. *Hno* 2017;65:73-79. doi: 10.1007/s00106-016-0290-z  
12  
13  
14 11. Wu M-S, Chen K-H, Chen IF, et al. The Efficacy of Acupuncture in Post-Operative Pain Management: A Systematic  
15  
16 Review and Meta-Analysis. *Plos One* 2016;11(3):e0150367. doi: 10.1371/journal.pone.0150367  
17  
18  
19 12. Teoh AYB, Chong CCN, Leung WW, et al. Electroacupuncture-reduced sedative and analgesic requirements for  
20  
21 diagnostic EUS: a prospective, randomized, double-blinded, sham-controlled study. *Gastrointestinal Endoscopy*  
22  
23 2018;87(2):476-85. doi: 10.1016/j.gie.2017.07.029  
24  
25  
26  
27 13. MacPherson H, Altman DG, Hammerschlag R, et al. Revised STandards for Reporting Interventions in Clinical Trials  
28  
29 of Acupuncture (STRICTA): extending the CONSORT statement. *Acupuncture in Medicine* 2010;28(2):83-93.  
30  
31 doi: 10.1136/aim.2009.001370  
32  
33  
34  
35 14. Barr J, Fraser GL, Puntillo K, et al. Clinical Practice Guidelines for the Management of Pain, Agitation, and Delirium  
36  
37 in Adult Patients in the Intensive Care Unit. *Critical Care Medicine* 2013;41(1):263-306. doi:  
38  
39 10.1097/CCM.0b013e3182783b72  
40  
41  
42  
43 15. Ely EW, Truman B, Shintani A, et al. Monitoring sedation status over time in ICU patients - Reliability and validity of  
44  
45 the Richmond Agitation-Sedation Scale (RASS). *Jama-Journal of the American Medical Association*  
46  
47 2003;289(22):2983-91. doi: 10.1001/jama.289.22.2983  
48  
49  
50  
51 16. Sessler CN, Gosnell MS, Grap MJ, et al. The Richmond Agitation-Sedation Scale - Validity and reliability in adult  
52  
53 intensive care unit patients. *American Journal of Respiratory and Critical Care Medicine* 2002;166(10):1338-44.  
54  
55  
56  
57 doi: 10.1164/rccm.2107138  
58  
59 17. Payen JF, Bru O, Bosson JL, et al. Assessing pain in critically ill sedated patients by using a behavioral pain scale.  
60

- 1  
2  
3  
4 *Critical Care Medicine* 2001;29(12):2258-63. doi: 10.1097/00003246-200112000-00004  
5  
6  
7 18. Chanques G, Viel E, Constantin J-M, et al. The measurement of pain in intensive care unit: Comparison of 5 self-report  
8  
9 intensity scales. *Pain* 2010;151(3):711-21. doi: 10.1016/j.pain.2010.08.039  
10  
11  
12 19. Girard TD, Kress JP, Fuchs BD, et al. Efficacy and safety of a paired sedation and ventilator weaning protocol for  
13  
14 mechanically ventilated patients in intensive care (Awakening and Breathing Controlled trial): a randomised  
15  
16 controlled trial. *Lancet* 2008;371(9607):126-34. doi: 10.1016/s0140-6736(08)60105-1  
17  
18  
19 20. Subira C, Hernandez G, Vazquez A, et al. Effect of Pressure Support vs T-Piece Ventilation Strategies During  
20  
21 Spontaneous Breathing Trials on Successful Extubation Among Patients Receiving Mechanical Ventilation A  
22  
23 Randomized Clinical Trial. *Jama-Journal of the American Medical Association* 2019;321(22):2175-82. doi:  
24  
25 10.1001/jama.2019.7234  
26  
27  
28 21. Hui D, Frisbee-Hume S, Wilson A, et al. Effect of Lorazepam With Haloperidol vs Haloperidol Alone on Agitated  
29  
30 Delirium in Patients With Advanced Cancer Receiving Palliative Care A Randomized Clinical Trial. *Jama-Journal*  
31  
32 *of the American Medical Association* 2017;318(11):1047-56. doi: 10.1001/jama.2017.11468  
33  
34  
35 22. Carrasco G, Molina R, Costa J, et al. Propofol vs midazolam in short-, medium-, and long-term sedation of critically  
36  
37 ill patients. A cost-benefit analysis. *Chest* 1993;103(2):557-64. doi: 10.1378/chest.103.2.557  
38  
39  
40 23. Liu L, Wu A-P, Yang Y, et al. Effects of Propofol on Respiratory Drive and Patient-ventilator Synchrony during  
41  
42 Pressure Support Ventilation in Postoperative Patients: A Prospective Study. *Chinese Medical Journal*  
43  
44 2017;130(10):1155-60. doi: 10.4103/0366-6999.205864  
45  
46  
47  
48 24. Kollef MH, Levy NT, Ahrens TS, et al. The use of continuous IV sedation is associated with prolongation of mechanical  
49  
50 ventilation. *Chest* 1998;114(2):541-48. doi: 10.1378/chest.114.2.541  
51  
52  
53 25. Ouimet S, Kavanagh BP, Gottfried S, et al. Incidence, risk factors and consequences of ICU delirium. *Intensive Care*  
54  
55 *Medicine* 2007;33(1):66-73. doi: 10.1007/s00134-006-0399-8  
56  
57  
58  
59  
60

- 1  
2  
3  
4 26. Chanques G, Conseil M, Roger C, et al. Immediate interruption of sedation compared with usual sedation care in  
5  
6 critically ill postoperative patients (SOS-Ventilation): a randomised, parallel-group clinical trial. *Lancet*  
7  
8  
9 *Respiratory Medicine* 2017;5(10):795-805. doi: 10.1016/s2213-2600(17)30304-1  
10  
11  
12 27. Mehta S, Burry L, Cook D, et al. Daily Sedation Interruption in Mechanically Ventilated Critically Ill Patients Cared  
13  
14 for With a Sedation Protocol A Randomized Controlled Trial. *Jama-Journal of the American Medical Association*  
15  
16 2012;308(19):1985-92. doi: 10.1001/jama.2012.13872  
17  
18  
19 28. Asmussen S, Przkora R, Maybauer DM, et al. Meta-Analysis of Electroacupuncture in Cardiac Anesthesia and Intensive  
20  
21 Care. *Journal of Intensive Care Medicine* 2019;34(8):652-61. doi: 10.1177/0885066617708558  
22  
23  
24 29. Harris RE, Zubieta J-K, Scott DJ, et al. Traditional Chinese acupuncture and placebo (sham) acupuncture are  
25  
26 differentiated by their effects on mu-opioid receptors (MORs). *Neuroimage* 2009;47(3):1077-85. doi:  
27  
28 10.1016/j.neuroimage.2009.05.083  
29  
30  
31 30. Han JS. Acupuncture: neuropeptide release produced by electrical stimulation of different frequencies. *Trends in*  
32  
33 *Neurosciences* 2003;26(1):17-22. doi: 10.1016/s0166-2236(02)00006-1  
34  
35  
36 31. Lin JG, Lo MW, Wen YR, et al. The effect of high and low frequency electroacupuncture in pain after lower abdominal  
37  
38 surgery. *Pain* 2002;99(3):509-14. doi: 10.1016/S0304-3959(02)00261-0 [published Online First: 2002/10/31]  
39  
40  
41 32. Chiu JH, Chen WS, Chen CH, et al. Effect of transcutaneous electrical nerve stimulation for pain relief on patients  
42  
43 undergoing hemorrhoidectomy: prospective, randomized, controlled trial. *Dis Colon Rectum* 1999;42(2):180-5.  
44  
45 doi: 10.1007/BF02237124 [published Online First: 1999/04/22]  
46  
47  
48 33. Chen J, Zhang Y, Li X, et al. Efficacy of transcutaneous electrical acupoint stimulation combined with general  
49  
50 anesthesia for sedation and postoperative analgesia in minimally invasive lung cancer surgery: A randomized,  
51  
52 double-blind, placebo-controlled trial. *Thorac Cancer* 2020;11(4):928-34. doi: 10.1111/1759-7714.13343  
53  
54  
55  
56  
57 [published Online First: 2020/02/18]  
58  
59  
60

- 1  
2  
3  
4 34. El-Rakshy M, Clark SC, Thompson J, et al. Effect of intraoperative electroacupuncture on postoperative pain, analgesic  
5 requirements, nausea and sedation: a randomised controlled trial. *Acupunct Med* 2009;27(1):9-12. doi:  
6  
7 10.1136/aim.2008.000075 [published Online First: 2009/04/17]  
8  
9  
10  
11 35. Chen Y, Gong Y, Huai X, et al. Effects of transcutaneous electrical acupuncture point stimulation on peripheral  
12 capillary oxygen saturation in elderly patients undergoing colonoscopy with sedation: a prospective randomized  
13 controlled trial. *Acupunct Med* 2021;39(4):292-98. doi: 10.1177/0964528420960479 [published Online First:  
14  
15 2020/12/02]  
16  
17  
18  
19  
20  
21 36. Fleckenstein J, Baeumler P, Gurschler C, et al. Acupuncture reduces the time from extubation to 'ready for discharge'  
22 from the post anaesthesia care unit: results from the randomised controlled AcuARP trial. *Sci Rep*  
23  
24 2018;8(1):15734. doi: 10.1038/s41598-018-33459-y [published Online First: 2018/10/26]  
25  
26  
27  
28  
29  
30 37. Cabrini L, Gioia L, Gemma M, et al. Bispectral index evaluation of the sedative effect of acupuncture in healthy  
31 volunteers. *J Clin Monit Comput* 2006;20(5):311-5. doi: 10.1007/s10877-006-9026-z [published Online First:  
32  
33 2006/09/22]  
34  
35  
36  
37 38. Zheng X, Meng JB, Fang Q. Electroacupuncture reduces the dose of midazolam monitored by the bispectral index in  
38 critically ill patients with mechanical ventilation: an exploratory study. *Acupunct Med* 2012;30(2):78-84. doi:  
39  
40 10.1136/acupmed-2011-010095 [published Online First: 2012/03/31]  
41  
42  
43  
44  
45 39. Meldrum ML. A brief history of the randomized controlled trial - From oranges and lemons to the gold standard.  
46  
47 *Hematology-Oncology Clinics of North America* 2000;14(4):745-60. doi: 10.1016/s0889-8588(05)70309-9  
48  
49  
50 40. Boutron I, Guittet L, Estellat C, et al. Reporting methods of blinding in randomized trials assessing nonpharmacological  
51 treatments. *Plos Medicine* 2007;4(2):370-80. doi: 10.1371/journal.pmed.0040061  
52  
53  
54  
55 41. Chen Z-x, Li Y, Zhang X-g, et al. Sham Electroacupuncture Methods in Randomized Controlled Trials. *Scientific*  
56  
57 *Reports* 2017;7:40837. doi: 10.1038/srep40837  
58  
59  
60

1  
2  
3  
4 42. Lund I, Lundeberg T. Are minimal, superficial or sham acupuncture procedures acceptable as inert placebo controls?  
5

6  
7 *Acupuncture in medicine : journal of the British Medical Acupuncture Society* 2006;24(1):13-5.  
8

9 43. Lundeberg T, Lund I, Naslund J, et al. The Emperor's sham - wrong assumption that sham needling is sham.  
10

11  
12 *Acupuncture in Medicine* 2008;26(4):239-42. doi: 10.1136/aim.26.4.239  
13

14 44. Kim T-H, Lee MS, Alraek T, et al. Acupuncture in sham device controlled trials may not be as effective as acupuncture  
15

16  
17 in the real world: a preliminary network meta-analysis of studies of acupuncture for hot flashes in menopausal  
18  
19 women. *Acupuncture in Medicine* 2020;38(1):37-44. doi: 10.1136/acupmed-2018-011671  
20  
21  
22  
23  
24  
25  
26  
27  
28  
29  
30  
31  
32  
33  
34  
35  
36  
37  
38  
39  
40  
41  
42  
43  
44  
45  
46  
47  
48  
49  
50  
51  
52  
53  
54  
55  
56  
57  
58  
59  
60



**Table 1. Inclusion and exclusion criteria**

| A. Inclusion criteria                                                            | B. Exclusion criteria                                                  |
|----------------------------------------------------------------------------------|------------------------------------------------------------------------|
| 1. Aged 18 years or over and under 80 years;                                     | 1. Skin lesions near the acupuncture points;                           |
| 2. Required mechanical ventilation >24 hours;                                    | 2. Coagulopathy (bleeding time >4 min, thrombocytes <50,000/ $\mu$ l); |
| 3. Continuous intravenous administration of sedative and analgesic medications;  | 3. Hypohepatia with Childs-Pugh class B or C;                          |
| 4. Willingness to provide informed consent prior to enrollment;                  | 4. Second- or third-degree atrioventricular block;                     |
| 5. Be able to comply with all follow-up evaluations (in investigator's opinion). | 5. Severe dementia;                                                    |
|                                                                                  | 6. Psychiatric disorder;                                               |
|                                                                                  | 7. Neurological disease;                                               |
|                                                                                  | 8. Active seizures;                                                    |
|                                                                                  | 9. Alcohol or drug abuse;                                              |
|                                                                                  | 10. Benzodiazepine dependency;                                         |
|                                                                                  | 11. Moribund state with the planned withdrawal of life support;        |
|                                                                                  | 12. Family or physician refusal;                                       |

1  
2  
3  
4 13. Pregnancy or lactation;  
5

6  
7 14. Currently participated in any other  
8  
9  
10 investigational therapeutic or device trial.  
11  
12  
13  
14  
15  
16  
17  
18  
19  
20  
21  
22  
23  
24  
25  
26  
27  
28  
29  
30  
31  
32  
33  
34  
35  
36  
37  
38  
39  
40  
41  
42  
43  
44  
45  
46  
47  
48  
49  
50  
51  
52  
53  
54  
55  
56  
57  
58  
59  
60

For peer review only

1  
2  
3  
4  
5  
6  
7  
8  
9  
10  
11  
12  
13  
14  
15  
16  
17  
18  
19  
20  
21  
22  
23  
24  
25  
26  
27  
28  
29  
30  
31  
32  
33  
34  
35  
36  
37  
38  
39  
40  
41  
42  
43  
44  
45  
46  
47  
48  
49  
50  
51  
52  
53  
54  
55  
56  
57  
58  
59  
60

Figure legend:

Figure 1. Trial design of PASSION study

Figure 2. Forest plot of AC group versus NAC group.

Figure 3. Forest plot of AC group versus NAC group.

For peer review only

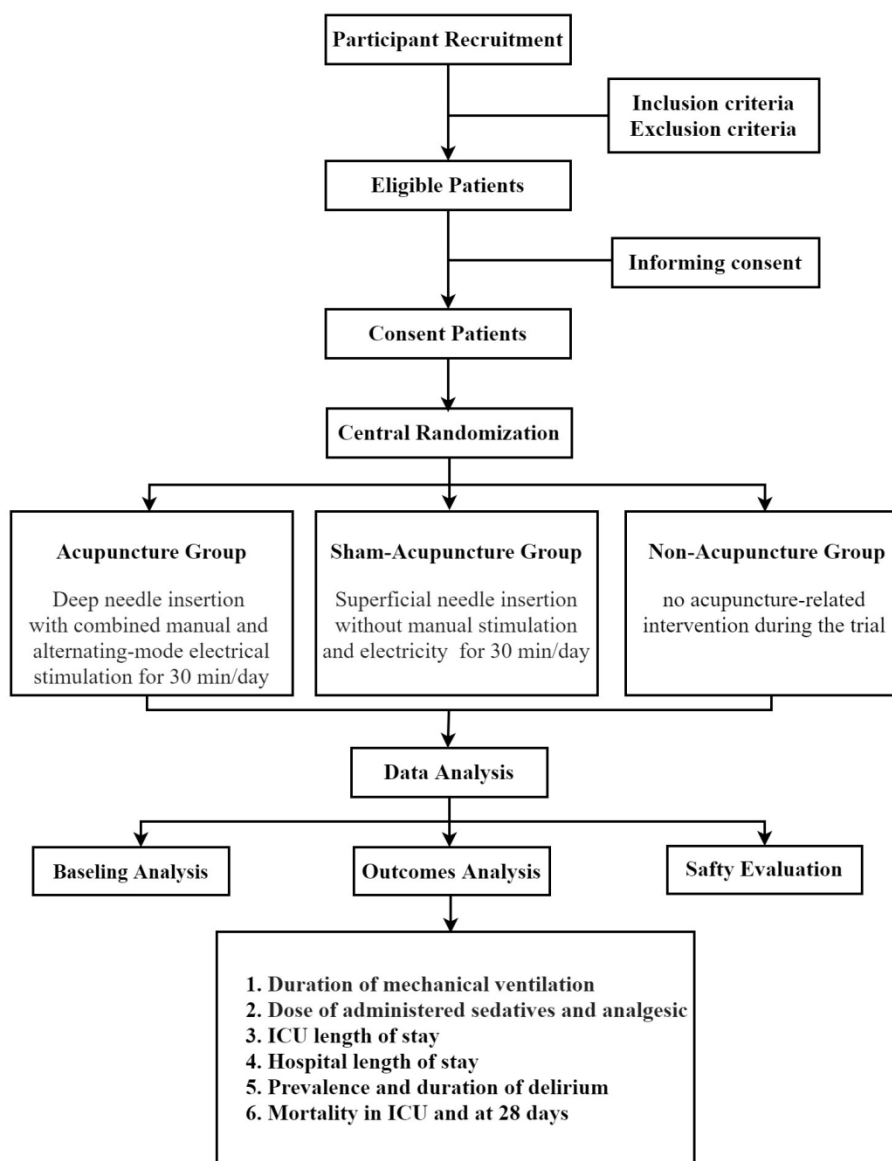

Figure 1

130x165mm (300 x 300 DPI)

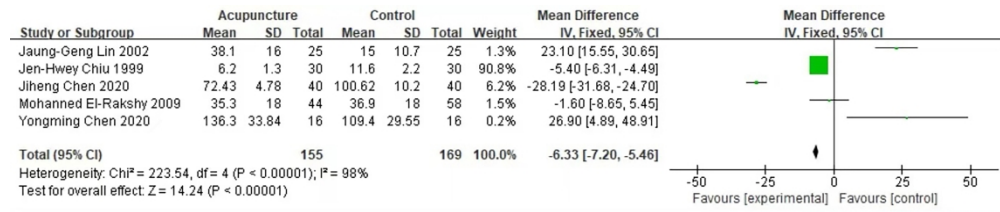

Figure 2

219x46mm (300 x 300 DPI)

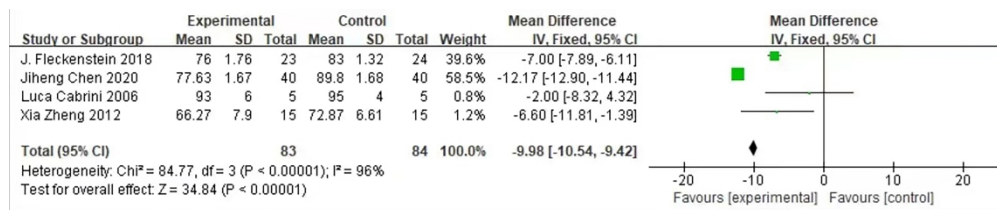

Figure 3

219x45mm (300 x 300 DPI)

# BMJ Open

**Prospective comparison of acupuncture with sham acupuncture to determine impact on sedation and analgesia in mechanically ventilated critically ill patients (PASSION study): protocol for a randomized controlled trial**

|                                 |                                                                                                                                                                                                                                                                                                                                                                                                                                                     |
|---------------------------------|-----------------------------------------------------------------------------------------------------------------------------------------------------------------------------------------------------------------------------------------------------------------------------------------------------------------------------------------------------------------------------------------------------------------------------------------------------|
| Journal:                        | <i>BMJ Open</i>                                                                                                                                                                                                                                                                                                                                                                                                                                     |
| Manuscript ID                   | bmjopen-2021-059741.R1                                                                                                                                                                                                                                                                                                                                                                                                                              |
| Article Type:                   | Protocol                                                                                                                                                                                                                                                                                                                                                                                                                                            |
| Date Submitted by the Author:   | 14-May-2022                                                                                                                                                                                                                                                                                                                                                                                                                                         |
| Complete List of Authors:       | Zhang, Yuzhuo; Guangzhou University of Chinese Medicine<br>Yang, Guang; Guangzhou University of Chinese Medicine<br>Wei, Jinyi; Guangzhou University of Chinese Medicine<br>Chen, Fangliang; Guangzhou University of Chinese Medicine<br>Zhang, Min-Zhou; Guangzhou University of Chinese Medicine<br>Mao, Shuai; Guangzhou University of Chinese Medicine; Guangdong Provincial Hospital of Chinese Medicine, Department of Critical Care Medicine |
| <b>Primary Subject Heading</b>: | Intensive care                                                                                                                                                                                                                                                                                                                                                                                                                                      |
| Secondary Subject Heading:      | Complementary medicine                                                                                                                                                                                                                                                                                                                                                                                                                              |
| Keywords:                       | Adult intensive & critical care < ANAESTHETICS, Adult anaesthesia < ANAESTHETICS, Pain management < ANAESTHETICS                                                                                                                                                                                                                                                                                                                                    |
|                                 |                                                                                                                                                                                                                                                                                                                                                                                                                                                     |

SCHOLARONE™  
Manuscripts

1  
2  
3  
4  
5 1 **Prospective comparison of acupuncture with sham acupuncture to**  
6  
7 **determine impact on sedation and analgesia in mechanically ventilated**  
8 2  
9 **critically ill patients (PASSION study): Protocol for a randomized**  
10 3  
11 **controlled trial**  
12 4

15 5 Yuzhuo Zhang, Ph.D. <sup>1\*</sup>

18 6 Guang Yang, M.D. <sup>1,2\*</sup>

20 7 Jinyi Wei, M.D. <sup>1</sup>

23 8 Fangliang Chen, M.D. <sup>1</sup>

26 9 Minzhou Zhang, M.D. <sup>1,2,4Δ</sup>

29 10 Shuai Mao, M.D. <sup>1,2,4Δ</sup>

32 11 *<sup>1</sup> Second Clinical College, Guangzhou University of Chinese Medicine, Guangzhou*  
34 12 *510405, China*

36 13 *<sup>2</sup> Department of Critical Care Medicine, Guangdong Provincial Hospital of Chinese*  
37 14 *Medicine, Guangzhou 510120, China*

39 15 *<sup>3</sup> Guangdong Provincial Branch of National Clinical Research Centre for Chinese*  
40 16 *Medicine Cardiology, Guangzhou 510120, China*

44 18 \*The first two authors contribute equally to this article.

46 19 ΔCorrespondence to:

48 20 Prof. Shuai MAO

50 21 Department of Critical Care Medicine,

51 22 Guangdong Provincial Hospital of Chinese Medicine,

53 23 Guangzhou 510120, China

54 24 Phone: 86-20-81887233

56 25 Fax: 86-20-81867705

57 26 E-mail: [maoshuai@gzucm.edu.cn](mailto:maoshuai@gzucm.edu.cn)

59 27 Or Prof. Minzhou Zhang [minzhouzhang@gzucm.edu.cn](mailto:minzhouzhang@gzucm.edu.cn)



## ABSTRACT

**Introduction** Sedation and analgesia are recommended to be employed in the intensive care unit (ICU) to enhance patient comfort and safety, facilitate mechanical ventilation, and reduce oxygen demands. However, the increasing evidence demonstrates that excessive sedation and analgesia might prolong mechanical ventilation and increase costs and mortality. Acupuncture is known to be able to attenuate pain, anxiety, and agitation symptoms while avoiding excessive sedation and analgesia caused by drugs. Therefore, we present a protocol to investigate whether acupuncture, used for sedation and analgesia, can reduce the duration of mechanical ventilation, save medical resources, and reduce the mortality of critically ill patients receiving mechanical ventilation.

**Methods and analysis** Prospective, randomized controlled trial (RCT) is conducted on 180 adult medical/surgical ICU patients with mechanical ventilation needing sedation at 3 ICUs between 03 November 2021 and 16 August 2023. Patients will be treated with analgesia and sedation to achieve desired target sedation levels (Richmond Agitation Sedation Score of -2 to 1). Enrolled patients will be randomly assigned in a ratio of 1:1:1 to receive deep needle insertion with combined manual and alternating-mode electrical stimulation on acupoints (AC group), superficial needle insertion without manual stimulation and electrical stimulation on non-acupoints (SAC group), or no acupuncture intervention (NAC group).

The primary outcome is the duration of mechanical ventilation from randomization until patients are free of mechanical ventilation (including noninvasive) without reinstitution for the following 48 hours. Secondary endpoints include the dose of administered sedatives and analgesic at comparable sedation levels throughout the study, ICU length of stay, hospital length of stay. Additional outcomes include the prevalence and days of delirium in ICU, mortality in ICU and within 28 days after randomization, and the number of ventilator free days in 28 days.

1  
2  
3  
4  
5  
6  
7  
8  
9  
10  
11  
12  
13  
14  
15  
16  
17  
18  
19  
20  
21  
22  
23  
24  
25  
26  
27  
28  
29  
30  
31  
32  
33  
34  
35  
36  
37  
38  
39  
40  
41  
42  
43  
44  
45  
46  
47  
48  
49  
50  
51  
52  
53  
54  
55  
56  
57  
58  
59  
60

**Ethics and dissemination** This trial was approved by the ethics committee at Guangdong Provincial Hospital of Chinese Medicine. We will publish the study results.

**Trial Registration numbers: ChiCTR2100052650**

**Keywords:**

acupuncture; sedation; analgesia; critically ill patients; nonpharmacological therapy

**Word Count: 3805**

For peer review only

## Strengths and limitations of this study

- This study is an RCT to investigate both the sedative and analgesic effects of acupuncture on critically ill patients needing mechanical ventilation in ICU.
- This study provides a sedative and analgesic strategy for mechanically ventilated critically ill patients with less side effects.
- The primary endpoint is the duration of mechanical ventilation from randomization until patients are free of mechanical ventilation (including noninvasive) without reinstitution for the following 48 hours.
- Secondary endpoints include the dose of administered sedatives and analgesics at comparable sedation levels throughout the study, ICU length of stay, and hospital length of stay.
- Limitations are the non-blinded interventions due to the nature of acupuncture.

## INTRODUCTION

Sedative and analgesic medications are routinely administered to mechanically ventilated critically ill patients to reduce pain, anxiety, and agitation, as well as to allow patients to tolerate invasive procedures in the intensive care unit (ICU).<sup>1</sup> Opiates are most commonly used analgesics, while benzodiazepines, propofol, or dexmedetomidine are typically used to prevent or reduce anxiety and agitation.<sup>2</sup> However, overuse of these medications is associated with worsened clinical outcomes, such as prolonged mechanical ventilation and hospital length of stay, increased risk of altered mental status, and even higher mortality.<sup>3</sup> Thus, reducing the unnecessary dosage of sedative and analgesic medications, as well as their side effects while providing desired sedation has always been a key objective when caring for critically ill patients.

As a therapeutic modality with fewer adverse effects, acupuncture has been used in China and other Asian countries for thousands of years to treat various conditions.<sup>4-6</sup> Studies of acupuncture usually focuses on its analgesic effect, such as relieving pain and partly reducing opioid-related side effects during or after surgical procedures.<sup>7-11</sup> Particularly, the Centers for Medicare & Medicaid Services (CMS) of the USA finalizes a decision to cover acupuncture for chronic low back pain for Medicare beneficiaries in January 2020. Moreover, some studies have investigated the use of acupuncture on reducing sedative and analgesic drug demands, and the duration of mechanical ventilation, while improving patients' experience during mechanical ventilation.<sup>12-15</sup> However, there are still a few discrepant research findings on the sedative and analgesic effects of acupuncture.<sup>16 17</sup> And studies investigating both the sedative and analgesic effects of acupuncture among all critically ill patients needing mechanical ventilation in ICU are limited.

Therefore, the PASSION study is designed to be an RCT which investigate the efficacy of acupuncture on sedation and analgesia in mechanically ventilated critically ill patients. We are going to test the hypothesis that acupuncture, as adjunctive therapy to

1  
2  
3  
4 100 sedation and analgesia therapies, could reduce the duration of mechanical ventilation,  
5  
6 101 the dose of administered sedatives and analgesics, and subsequently improve other  
7  
8 102 clinical outcomes for critically ill patients when compared with sham acupuncture or  
9  
10 103 non-acupuncture.

## 11 12 13 104 **METHODS**

### 14 15 105 **Study Design Overview**

16  
17  
18 106 This is a prospective, parallel-group, controlled trial will recruit 180 patients with a  
19  
20 107 computer-generated allocation sequence and centralized randomization at tertiary and  
21  
22 108 regional ICUs in 3 hospitals (Guangdong Provincial Hospital of Chinese Medicine,  
23  
24 109 Charity Hospital of Guangzhou, University Hospital) in South China. Recruitment  
25  
26 110 officially began on 03 November 2021, and the final follow-up of the last subject will  
27  
28 111 not exceed 16 August 2023. Eligible patients will be randomly assigned, in a ratio of  
29  
30 112 1:1:1, to receive deep needle insertion with combined manual and alternating-mode  
31  
32 113 electrical stimulation on acupoints (AC group, n =60), superficial needle insertion  
33  
34 114 without manual or electrical stimulation on non-acupoints (SAC group, n =60) for 30  
35  
36 115 min/day, or no acupuncture intervention (NAC group, n =60), respectively.

37  
38  
39 116 Participants will be assessed for the duration of mechanical ventilation, as well as the  
40  
41 117 dose of administered sedatives and analgesics at comparable sedation levels, from  
42  
43 118 randomization until patients are free of mechanical ventilation (including noninvasive)  
44  
45 119 without reinstitution for the following 48 hours. They will be also assessed for whether  
46  
47 120 acupuncture can achieve better clinical outcomes than SAC and NAC treatment. The  
48  
49 121 design of the trial is summarized in Figure 1.

### 50 51 52 122 **Ethical Requirements and Registration**

53  
54  
55 123 This protocol is approved by the Institutional Human Clinical Research Ethical  
56  
57 124 Committee at Guangdong Provincial Hospital of Chinese Medicine (Guangzhou, China)  
58  
59 125 in October 2021 with permission number ZF2021-144-01. The PASSION study was  
60

1  
2  
3  
4 126 registered on Nov 3, 2021 (ClinicalTrials.gov, number ChiCTR2100052650) and will  
5  
6 127 be conducted following the Declaration of Helsinki from 03 November 2021 to 16  
7  
8 128 August 2023.

9  
10  
11 129 Written informed consent will be provided before enrollment voluntarily. Considering  
12  
13 130 that patients will be sedated following ICU admission, complete adherence to patient  
14  
15 131 consent is deemed impossible. Patients or their authorized surrogates will be informed  
16  
17 132 by the researchers of the investigational nature and details of the study, together with  
18  
19 133 the possible risks and all the benefits. Written informed consent will be subsequently  
20  
21 134 obtained from either of them. Patients from whom surrogate consent is obtained are  
22  
23 135 asked again to provide informed consent once determined to be competent. They can  
24  
25 136 also withdraw from the study at any time they wish. Also, the investigator can decide to  
26  
27 137 withdraw a subject from the study for urgent medical reasons. The researcher should  
28  
29 138 complete the case report form (CRF) and record the reason for dropping out.

### 31 32 139 **Patients**

33  
34 140 Patients from medical and surgical ICU, aging from 18 to 80 years, for expected  
35  
36 141 mechanical ventilation longer than 24 hours, with agitation and/or discomfort after  
37  
38 142 recovering from drugs used to facilitate endotracheal intubation, requiring sedation and  
39  
40 143 agitation by continuous intravenous administration deemed by the ICU physician, are  
41  
42 144 eligible for participation as soon as they or their authorized surrogates are willing to  
43  
44 145 give informed consent (Table 1).

46  
47 146 Exclusion criteria include skin lesions near the acupuncture points, coagulopathy  
48  
49 147 (bleeding time >4 min, thrombocytes <50,000/ $\mu$ l), neurological disease (previous stroke,  
50  
51 148 cerebral palsy, etc.) that would confound the diagnosis of delirium, active seizures,  
52  
53 149 severe dementia, relevant psychiatric disorder, hypohepatia with Childs-Pugh class B  
54  
55 150 or C, second- or third-degree atrioventricular block, alcohol or drug abuse,  
56  
57 151 benzodiazepine dependency, a moribund state with the planned withdrawal of life  
58  
59  
60

1  
2  
3  
4 152 support, family or physician refusal, pregnancy or lactation, currently participating in  
5  
6 153 any other investigational therapeutic or device trial (Table 1).  
7

### 8 154 **ICU standard treatment**

10  
11 155 As a standard in each ICU of our study, mechanically ventilated critically ill patients  
12  
13 156 will be treated in a single treatment room. They will be taken care of by a trained ICU  
14  
15 157 physician responsible for all treatment decisions, including sedation analgesia  
16  
17 158 management plans made in consultation with the bedside nurses. They will also receive  
18  
19 159 one-to-one nursing care to adjust the treatment based on the patient's response in time.  
20  
21 160 A team of medical officers will review patient care every day.  
22  
23

### 24 161 **Randomization and blinding**

26  
27 162 Eligible patients will be stratified by participating sites to avoid patient-level  
28  
29 163 contamination from the systems-level organizational change in sedation practice and,  
30  
31 164 within each ICU, assigned to the AC, SAC, or NAC group in an equal ratio via  
32  
33 165 computer-generated randomization. In detail, an independent study coordinator will log  
34  
35 166 into the central randomization system using a password-protected account and enter  
36  
37 167 inclusion and exclusion criteria to ensure eligibility. After entering a patient's name and  
38  
39 168 identification card number, a randomization sequence will be generated in blocks of  
40  
41 169 varying sizes and stratified by the site under the control of the central computer system.  
42  
43 170 The random sequence will then be concealed in sealed envelopes and sent to an  
44  
45 171 acupuncturist from the assigned patient's site by the study coordinator.  
46  
47

48 172 Allocation of participants will be known to the study coordinator and acupuncturists  
49  
50 173 who will not be involved in outcome assessment and be required to sign a confidentiality  
51  
52 174 agreement about patient allocation. All patients will be treated in a single treatment  
53  
54 175 room. In both AC and SAC groups, patients, bedside nurses, and physicians will be  
55  
56 176 blinded to which acupuncture method the patients will receive. The data collectors and  
57  
58 177 the biostatisticians will be masked from the treatment assignment.  
59  
60



## Acupuncture interventions and procedures

The acupuncture interventions will be developed by a consensus of acupuncture experts according to the Standards for Reporting of Controlled Trials in Acupuncture (STRICTA).<sup>18</sup> Patients will be assigned in a ratio of 1:1:1 to AC group (n=60), SAC group (n=60), and NAC group (n=60). Besides, each group shares the same basic Sedation Analgesia Strategy.

For patients in the AC group, 8 disposable sterile acupuncture needles (filiform needles made of stainless steel, Beijing Hanyi Medical Instruments, China) with a length of 40 mm and a diameter of 0.30 mm will be inserted into acupuncture points at Baihui (DU20), Yintang (EX-HN3), and bilateral acupoints of Shenmen (HT7), Hegu (LI4), Taichong (LR3) according to the theory of traditional Chinese medicine. The localization of these points is measured with a unit of *cun*, a traditional Chinese unit of length. One *cun* of a person is defined as the width of the thumb himself, whereas four fingers are defined as 3 *cun*. The insertion will be followed by manual stimulation, a lifting and thrusting technique combined with twirling and rotating the needle sheath to produce a sensation of soreness, numbness, distention, or radiating. This sensation is known as “*Deqi*” and is considered to be indicative of effective needling. Then, alternating-mode electrical stimulation will be given with the parameters: bursts alternating at 2 Hz and 100 Hz every 3 s, with 10-15 mA intensity inducing no discomfort and no muscle contraction.

For patients in the SAC group, superficial needle insertion with a depth of 2 mm and no manual stimulation will be performed for 30 min/day. The same sort of needles with the AC group will be placed 1 cm distant lateral the used acupoints that are not known as AC points. The electrical stimulator will likewise be connected but without electrical stimulation. (Figure 2)



1  
2  
3  
4 203 Patients in the NAC group will receive no acupuncture-related intervention during the  
5  
6 204 trial. But they can receive a free 12-session daily acupuncture treatment after completing  
7  
8 205 the study at their convenience.

9  
10  
11 206 Each site will be required to have 2 licensed acupuncturists with more than 3 years of  
12  
13 207 experience and specialized training in the acupuncture protocols before starting the  
14  
15 208 study. The acupuncturists will be responsible for the whole acupuncture process but are  
16  
17 209 not further involved in this study.

### 18 19 210 **Basic Sedation Analgesia Strategy**

20  
21  
22 211 In this study, diagnosis and therapeutic management of agitation and pain will be  
23  
24 212 prescribed by the physicians responsible for the clinical care of each patient according  
25  
26 213 to recommended guidelines<sup>19</sup>. An interruptive sedation strategy will be adopted by  
27  
28 214 bedside nurses, and sedation levels and pain intensity will be assessed with the  
29  
30 215 Richmond Agitation Sedation Scale (RASS)<sup>20 21</sup>, the Behavioral Pain Scale (BPS), or  
31  
32 216 the Numeric Rating Scale (NRS)<sup>22 23</sup> every 4 h in order to adapt sedatives and analgesics  
33  
34 217 to avoid overuse. Authorized nurses will titrate infusions, including benzodiazepines,  
35  
36 218 propofol, and dexmedetomidine for sedatives and opiates for analgesia, instead of bolus  
37  
38 219 dosing to minimize potential adverse effects.

39  
40  
41 220 The sedation analgesia strategy is designed to consider pain treatment before increasing  
42  
43 221 sedatives to minimize the risk of oversedation. The pain will be assessed either by the  
44  
45 222 BPS in patients unable to communicate or by the NRS, a 1-10 numeric rating scale, in  
46  
47 223 those sufficiently oriented and awake to communicate with the medical staff. Efficacy  
48  
49 224 of the study analgesics drug will be defined as the ability to achieve a score < 3 in both  
50  
51 225 of the pain scoring systems above, evaluated by the bedside nurse. Efficacy of the  
52  
53 226 sedative drug will be defined as the ability to achieve a sedation score between -2 and  
54  
55 227 1, set by the patient's medical team using the RASS (a highly reliable and well-validated  
56  
57 228 sedation scale for use within patients) over time in the ICU.

1  
2  
3  
4 229 Each morning, a daily interruption of sedation (DIS) will be performed at the clinical  
5  
6 230 medical team's discretion. Major opioid infusions needed for active pain will be  
7  
8 231 continued. Recommended criteria to interrupt sedation are used: no drug-induced  
9  
10232 paralysis, no intracranial hypertension, no myocardial ischemia in the previous 24 h,  
11  
12233 primary disease healing in progress, hemodynamic stability, the partial pressure of  
13  
14234 arterial oxygen  $\geq 60$  mmHg, the fraction of inspired oxygen  $\leq 50\%$ , and positive end-  
15  
16235 expiratory pressure  $\leq 8$  cmH<sub>2</sub>O. The interruption of continuous sedation will be coupled  
17  
18236 with an assessment hourly for wakefulness, defined as the RASS score 1 to 4, and the  
19  
20237 ability to perform at least 3 of the following requests: eye-opening, tracking, hand  
21  
22238 squeezing, and toe moving. With the criteria recommended, patients will be able to pass  
23  
24239 the DIS if they can tolerate it for 4 h and keep awakening enough. Then, a spontaneous  
25  
26240 breathing trial (SBT) will immediately be managed.<sup>24</sup> If patients are insufficient for the  
27  
28241 DIS, sedatives will be restarted at half the previous dose and then titrated to achieve  
29  
30242 patient comfort. DIS will be performed the next morning again.

### 31 32 33243 **Extubation Test**

34  
35  
36244 Before extubation, patients will be managed with an SBT. During the SBT, without  
37  
38245 ventilatory support, patients will be allowed to breathe through a ventilatory circuit with  
39  
40246 8cm H<sub>2</sub>O PSV, 0 PEEP, and unchanged FiO<sub>2</sub> from the mechanical ventilation period  
41  
42247 leading up to the SBT.<sup>25</sup> The criteria for a successful SBT are respiratory rate between  
43  
44248 8 and 35 breaths/min, arterial oxygen saturation  $> 88\%$ , less than 20% change in mean  
45  
46249 arterial pressure or heart rate, no signs of respiratory distress and acute cardiac  
47  
48250 arrhythmia, no use of accessory muscles, no abdominal paradox, absence of sweating,  
49  
50251 agitation or impaired vigilance status. Patients will pass the SBT if they complete a 60  
51  
52252 min trial meeting the criteria, and extubation will be implemented 6 h later. Patients who  
53  
54253 fail the SBT will be ventilated immediately with the ventilator settings used before the  
55  
56254 trial, and sedatives will be restarted at half the previous dose and then titrated to achieve  
57  
58255 patient comfort. The SBT will be managed the next morning again. Extubation will be  
59  
60256 implemented following standardized criteria, but the decision to extubate remains upon

1  
2  
3  
4 257 the authority of the attending physician in charge of the patient. Researchers will not  
5  
6 258 participate in decisions to extubate patients.  
7

8  
9 259 The clinical research team will make sure that the overall research protocol, especially  
10  
11 260 the criteria for sedation and definition of successful SBT, is strictly followed by the  
12  
13 261 bedside nurse and medical teams in charge of the patients. Related information will be  
14  
15 262 reported on the clinical research form.  
16

### 17 263 **Assessing Delirium**

18  
19  
20 264 Delirium will be measured by the bedside nurses according to the Confusion  
21  
22 265 Assessment Method for the ICU (CAM-ICU) until out of ICU or hospital discharge.<sup>26</sup>  
23  
24 266 Patients will be considered in this state if they have a RASS score  $\geq -3$  and a positive  
25  
26 267 CAM-ICU, defined as positive with the symptoms of feature 1, feature 2, and either  
27  
28 268 feature 3 or feature 4 as follows:  
29

30  
31 269 Feature 1: acute onset of mental status change or fluctuation of mental status  
32

33  
34 270 Feature 2: inattention  
35

36 271 Feature 3: disorganized thinking  
37

38  
39 272 Feature 4: altered level of consciousness  
40

### 41 273 **Adverse Event Monitoring**

42  
43  
44 274 Adverse events will also be defined a priori and prospectively monitored. Adverse  
45  
46 275 events associated with acupuncture include bleeding, hematoma, and local infection.  
47  
48 276 Adverse events related to sedation and analgesia include inadequate pain and sedation  
49  
50  
51 277 management (either pain score  $> 4$  and RASS  $> 1$  for 2 consecutive hours or pain and  
52  
53 278 agitation assumed present if receiving neuromuscular blockade), clinically significant  
54  
55 279 iatrogenic withdrawal. Adverse events associated with mechanical ventilation include  
56  
57 280 accidental removal of medical devices, extubation failure (reintubation within 24 hours),  
58  
59 281 pressure ulcers, catheter-associated bloodstream infections, ventilator-associated  
60

1  
2  
3  
4  
5  
6  
7  
8  
9  
10  
11  
12  
13  
14  
15  
16  
17  
18  
19  
20  
21  
22  
23  
24  
25  
26  
27  
28  
29  
30  
31  
32  
33  
34  
35  
36  
37  
38  
39  
40  
41  
42  
43  
44  
45  
46  
47  
48  
49  
50  
51  
52  
53  
54  
55  
56  
57  
58  
59  
60

pneumonia. Every day, research personnel will monitor and assess the seriousness of all adverse events and document all details to determine whether the events are related to acupuncture interventions or the study procedure, as well as developing further treatment strategies including whether it is necessary to uncover blindness. A report of all serious, unexpected, and study-related adverse events will be presented to an independent data and safety monitoring board and the institutional review board within 7 days of occurrence.

### **Outcomes and Data Collection**

The primary outcome is the duration of mechanical ventilation, defined as the time from randomization to successful extubation without reinstitution for the following 48 hours. The secondary outcomes will include the dose of administered sedatives and opiate (absolute value as well as indexed value [total drug in mg/kg ÷ total number of hours from the start of infusion to its ultimate discontinuation]) at comparable clinically individualized target sedation goals throughout the study, the duration of ICU length of stay, and hospital length of stay. Additional outcomes include the prevalence and days of delirium in ICU, mortality in ICU and within 28 days after randomization, and the number of ventilator-free days in 28 days.

The day of extubation is considered as the day of death for patients who died while still intubated. Censoring for ICU or hospital length analyses occurred at the time of death or study withdrawal. The number of ventilator-free days in 28 days is defined as days alive and not using mechanical ventilation between days 1 and 28. For the 28-day mortality analyses, patients are censored at the time of the last contact alive or at 28 days from enrollment, whichever is first.

Baseline demographic data will be collected from patients' records by the medical team, including the reason for ICU admission, Acute Physiology and Chronic Health Evaluation (APACHE) II scores and diagnostic classification, Sequential Organ Failure Assessment (SOFA) scores, hematological and blood chemistry data, and clinical data

1  
2  
3  
4 309 (detailed information of sedative and analgesic medications administered to the patients  
5  
6 310 before randomization, cardiac safety profile including electrocardiograms and serum  
7  
8 311 troponins, and liver function profile including serum bilirubin and glutamate pyruvate  
9  
10312 transaminase, etc.). Vital signs such as blood pressure, heart rate, heart rhythm,  
11  
12313 temperature, and oxygen saturations will be recorded and collected by the bedside  
13  
14314 nurses, as well as scores of RASS, BPS, NRS, and CAM-ICU. Moreover, adverse events  
15  
16315 data will also be collected from patients' records. All of data mentioned above will be  
17  
18316 entered using the double entry method.

### 19 20 21317 **Patient and public involvement statement**

22  
23318 There is no patient or public involvement in the design, conduct, reporting or  
24  
25319 dissemination plans of this research.

### 26 27 28320 **Statistical Analysis**

29  
30  
31321 Statistical power is estimated using the reduction in duration of mechanical ventilation  
32  
33322 as the primary outcome. According to Carrasco and colleagues, the mean ( $\pm$ standard  
34  
35323 deviation) time for current sedation is  $54.7 \pm 12.3$  hours.<sup>27</sup> We calculate that a sample  
36  
37324 size of 48 patients in each group will provide a power of 90% to detect a 15% relative  
38  
39325 reduction in intubation time at a two-sided significance level of 0.05. With a dropout  
40  
41326 rate of 20%, the estimated sample size will be 60 patients per group. Thus, a total of 180  
42  
43327 patients will be enrolled in the study.

44  
45  
46328 The per-protocol set (PPS), including patients who complete the study without having  
47  
48329 major protocol violations, is used for the evaluation of clinical outcomes. While the full  
49  
50330 analysis set (FAS), determined according to the intention-to-treat population (ITT) who  
51  
52331 undergo randomization except for those who are excluded after randomization, is not  
53  
54332 only used for evaluation of clinical outcomes but also baseline characteristics to measure  
55  
56333 the balance of the three groups before intervention. Missing data will be replaced  
57  
58334 according to the principle of multiple imputation. Continuous data will be presented as  
59  
60335 median and interquartile range, while categorical data as numbers and proportion.

1  
2  
3  
4 336 Normal distribution will be checked by the Kolmogorov test. For continuous variables,  
5  
6 337 normal distributed data will be compared using one-way analysis of variance among  
7  
8 338 three groups, and independent Student's t-test between any of the two groups. While the  
9  
10339 comparison of non-normally distributed parameters among three groups will be applied  
11  
12340 by ANOVA (Kruska Wallis), and then the Mann-Whitney U-test between any of the  
13  
14341 two groups. Categorical data will be compared by using Fisher's exact test or the chi-  
15  
16342 square test. Other factors that may affect the efficacy will be considered as co-variants  
17  
18343 for covariance analysis or Cox proportional hazards regression model.  $P \leq 0.05$  will be  
19  
20344 considered to indicate statistical significance. All analyses will be done with R statistical  
21  
22345 software, version 4.0.2.

## 23 24 25346 **DISCUSSION**

26  
27  
28347 This prospective trial is designed to provide evidence on the beneficial effect of  
29  
30348 acupuncture on reducing the duration of mechanical ventilation, avoiding excessive  
31  
32349 sedation and analgesia, as well as improving clinical outcomes in sedating mechanically  
33  
34350 ventilated ICU patients.

35  
36351 General analgesia and sedation are necessary for mechanically ventilated critically ill  
37  
38352 patients. However, overuse of sedative and analgesic medications may cause varying  
39  
40353 degrees of side effects, like respiratory drive reduction.<sup>28</sup> These side effects are  
41  
42354 associated with worsened clinical outcomes, such as prolonged mechanical ventilation  
43  
44355 and hospital length of stay, increased risk of delirium, and even higher mortality.<sup>29 30</sup>  
45  
46356 With many sophisticated attempts to mitigate this clinical problem, it has thus far been  
47  
48357 identified that optimizing analgesia and sedation strategy is able to prevent excessive  
49  
50358 sedation and analgesia and improve the clinical outcome by reducing the duration and  
51  
52359 dosage of sedative and analgesic medications.<sup>31-33</sup> Thus, it become a key objective to  
53  
54360 formulate an intensive sedative and analgesic medications strategy when caring for  
55  
56361 critically ill patients.



1  
2  
3  
4 362 The rationale for evaluating the ability of acupuncture on this subject is based on  
5  
6 363 research findings that acupuncture can manage pain relief and facilitate opioid tapering  
7  
8 364 by increasing the  $\mu$ -opioid receptor binding ability and the release of the opioid  
9  
10 365 peptide.<sup>34 35</sup> According to the meta-analysis of acupuncture on pain relief, visual analog  
11  
12 366 scale (VAS) pain scores in the AC group is lower than that in the NAC group [MD=-  
13  
14 367 11.13, 95%CI(-13.59,-8.68), Z=8.9, P < 0.00001], Figure 3A.<sup>36-50</sup> However, there is a  
15  
16  
17 368 substantial heterogeneity of results in these trials ( $I^2 = 70\%$ ). As shown in Figure 3B,  
18  
19 369 heterogeneity decreases ( $I^2 = 14\%$ ) when the studies by Xian Wang and Zheng Lihong  
20  
21 370 are excluded, and the AC group consistently shows a greater pain relief compared to  
22  
23 371 NAC group [MD=-10.92, 95%CI(-12.93,-8.91), Z=10.66, P < 0.00001]. Meanwhile,  
24  
25 372 acupuncture, without adverse effects, has been shown to exert sedation effects in various  
26  
27 373 medical conditions. As it shown in the meta-analysis, with a high heterogeneity( $I^2 =$   
28  
29 374 95%), the bispectral index (BIS) value in the AC group is also lower than that in the  
30  
31 375 NAC group [MD=-5.82,95%CI (-9.36, -2.27), Z=3.22, P=0.001], Figure 4A.<sup>51-56</sup> As  
32  
33 376 shown in Figure 4B, heterogeneity decreases ( $I^2 = 0\%$ ) when the studies by J.  
34  
35 377 Fleckenstein and Jiheng Chen are excluded, and the AC group consistently shows a  
36  
37 378 better sedative effect compared to NAC group [MD=-3.18,95%CI(-5.53,-0.84),Z=2.66,  
38  
39  
40 379 P < 0.008]. In addition, previous studies have shown that Yintang (EX-HN3) and  
41  
42 380 Shenmen (HT7) have good sedative effects, Hegu (LI4) and Taichong (LR3) have  
43  
44 381 analgesic advantages, while Baihui (DU20) appears both sedative and analgesic  
45  
46 382 effects.<sup>54 57-60</sup> With these promising results, it is meaningful to assess acupuncture as a  
47  
48 383 potential analgesia and sedation strategy in ameliorating the clinical outcomes in  
49  
50 384 mechanically ventilated critically ill patients.

51  
52  
53 385 RCT has been recognized as the gold standard for clinical trials since the late 20th  
54  
55 386 century.<sup>61</sup> Another important designed technique to improve the quality of clinical trials  
56  
57 387 is blinding. Over the past several decades, RCT and blinding have been used to avoid  
58  
59 388 bias (selection bias, performance bias, and ascertainment bias) in clinical trials and  
60

1

2

3

4 389 improve the reliability of effects assessment. Sham acupuncture, aiming to blind the

5

6 390 participants and control therapeutic components, is designed as a placebo control.

7

8 391 However, this acupuncture technique is relatively difficult to fabricate because it should

9

10392 be both biologically inert and psychologically indistinguishable.<sup>62</sup> Even previous

11

12393 experience of acupuncture feeling might impact the present perception of verum and

13

14394 sham acupuncture intervention.

15

16  
17395 In PASSION study, we utilize a rigorous set of methods to minimize bias, such as

18

19396 computer-generated central randomization, parallel control design, and statistical

20

21397 analysis according to the intent-to-treat principle. In control design, the superficial

22

23398 needle insertion without manual or electrical stimulation at the non-point is applied to

24

25399 simulate deep skin penetration in the SAC group, which is used as the most predominant

26

27400 type of sham electropuncture method to ensure blinding according to the published

28

29401 literature.<sup>63</sup> However, a few studies reported that superficial needle insertion at non-

30

31402 acupoints might not be physiologically inert since the locations of points are nearby true

32

33403 acupoints.<sup>64 65</sup> Moreover, researchers found that even mechanical non-penetration can

34

35404 evoke slight acupressure effects and physiological activity.<sup>66</sup> Both of these factors will

36

37405 affect the effect assessment of acupuncture. Thus, the NA group, avoiding all

38

39406 therapeutic components, is designed to clarify whether the sham acupuncture can be

40

41407 regarded as physiologically inert, as well as compared with the results of the AC group.

42

43  
44408 A potential limitation of this trial is blinding. Given the nature of acupuncture, the

45

46409 patients and members of the medical team in the NA group are impossible to be blinded

47

48410 throughout the entire duration of this trial. However, adequate measures will be taken

49

50411 to put the patients and medical team members of the other two groups in a masked state.

51

52412 For example, we will formulate a set of isolation and secrecy strategies for the study

53

54413 coordinator and acupuncturists to achieve satisfactory blinding levels in treatment

55

56414 administration. Thus, in both AC and SAC groups, patients and their medical team

57

58415 members will be blinded to the patients' acupuncture method. The data collectors and

59

60416 the biostatisticians will also be masked from the treatment assignment.



1  
2  
3  
4 417 The PASSION study is designed to demonstrate the efficacy of acupuncture on sedation  
5  
6 418 and analgesia in mechanically ventilated critically ill patients. We expect the finding  
7  
8 419 can provide evidence-based recommendations for acupuncture use for sedation and  
9  
10 420 analgesia in critically ill patients with mechanical ventilation.  
11

### 12 13 421 14 15 422 **FUNDING STATEMENT:**

16  
17 423 This study was funded by National Science Foundation (grant No.  
18  
19 424 81703877&82074216&82004135), Science and Technology Planning Project of  
20  
21 425 Guangzhou (202102010301), a Featured Innovative Project from Guangdong Provincial  
22  
23 426 Universities (2019KTSCX029), Young Talents Support Project from China Association  
24  
25 427 of Chinese Medicine (2019-QNRC2-C06), Team of prevention and treatment of acute  
26  
27 428 myocardial infarction with Chinese medicine (2019KCXTD009), Foundation of  
28  
29 429 Guangdong Province of CM (20211187&20201142).  
30

### 31 32 430 **DISCLAIMER**

33  
34 431 The sponsors have had no role in the project development, in the collection of data, in  
35  
36 432 the preparation of this manuscript, nor the decision to publish. The researchers have  
37  
38 433 complete independence from the sources of funding in all aspects of this study.

### 39 40 434 **PATIENT CONSENT FOR PUBLICATION**

41  
42 435 Consent obtained from parent(s)/guardian(s).

### 43 44 436 **PROVENANCE AND PEER REVIEW**

45  
46 437 Not commissioned; externally peer reviewed.  
47

### 48 49 438 **ETHICS AND DISSEMINATION**

50  
51 439 The study was reviewed and approved by Ethics Committee of Guangdong Province  
52  
53 440 Hospital of Chinese Medicine at Guangzhou University of Chinese Medicine (ZF2021-  
54 441 144-01) and performed in accordance with Guide for the Care and Use of Laboratory  
55 442 Animals published by the US National Institutes of Health (publication No. 85-23,  
56  
57 443 revised 1996).  
58

### 59 60 444 **COMPETING INTERESTS STATEMENT**

1  
2  
3  
4  
5  
6  
7  
8  
9  
10  
11  
12  
13  
14  
15  
16  
17  
18  
19  
20  
21  
22  
23  
24  
25  
26  
27  
28  
29  
30  
31  
32  
33  
34  
35  
36  
37  
38  
39  
40  
41  
42  
43  
44  
45  
46  
47  
48  
49  
50  
51  
52  
53  
54  
55  
56  
57  
58  
59  
60

All authors declare that they have no conflict of interest.

## **AUTHORS' CONTRIBUTIONS**

YZ & SM drafted this manuscript; GY, JW & FC made statistical analysis; MZZ made a critical revision of the manuscript and contributed to the rationalization of the study.

All authors read and approved the final manuscript.

## **REFERENCE**

For peer review only

- 1  
2  
3  
4 451 1. Coursin DB, Skrobik Y. What Is Safe Sedation in the ICU? *New England Journal of Medicine*  
5  
6  
7 452 2019;380(26):2577-78. doi: 10.1056/NEJMe1906522  
8
- 9  
10 453 2. Subramaniam B, Shankar P, Shaefi S, et al. Effect of Intravenous Acetaminophen vs Placebo Combined  
11  
12 454 With Propofol or Dexmedetomidine on Postoperative Delirium Among Older Patients Following Cardiac  
13  
14  
15 455 Surgery The DEXACET Randomized Clinical Trial. *Jama-Journal of the American Medical Association*  
16  
17  
18 456 2019;321(7):686-96. doi: 10.1001/jama.2019.0234  
19
- 20 457 3. Shelton KT, Qu J, Bilotta F, et al. Minimizing ICU Neurological Dysfunction with Dexmedetomidine-induced  
21  
22  
23 458 Sleep (MINDDS): protocol for a randomised, double-blind, parallel-arm, placebo-controlled trial. *BMJ*  
24  
25  
26 459 *Open* 2018;8(4):e020316. doi: 10.1136/bmjopen-2017-020316 [published Online First: 2018/04/22]  
27
- 28 460 4. Zhao L, Li D, Zheng H, et al. Acupuncture as Adjunctive Therapy for Chronic Stable Angina: A Randomized  
29  
30  
31 461 Clinical Trial. *Jama Internal Medicine* 2019;179(10):1388-97. doi: 10.1001/jamainternmed.2019.2407  
32
- 33  
34 462 5. Garcia MK, Meng Z, Rosenthal DI, et al. Effect of True and Sham Acupuncture on Radiation-Induced  
35  
36  
37 463 Xerostomia Among Patients With Head and Neck Cancer: A Randomized Clinical Trial. *Jama Network*  
38  
39 464 *Open* 2019;2(12):e1916910. doi: 10.1001/jamanetworkopen.2019.16910  
40
- 41  
42 465 6. Pei W, Peng R, Gu Y, et al. Research trends of acupuncture therapy on insomnia in two decades (from 1999  
43  
44  
45 466 to 2018): a bibliometric analysis. *Bmc Complementary and Alternative Medicine* 2019;19(1):225. doi:  
46  
47  
48 467 10.1186/s12906-019-2606-5  
49
- 50 468 7. He Y, Guo X, May BH, et al. Clinical Evidence for Association of Acupuncture and Acupressure With Improved  
51  
52  
53 469 Cancer Pain A Systematic Review and Meta-Analysis. *Jama Oncology* 2020;6(2):271-78. doi:  
54  
55  
56 470 10.1001/jamaoncol.2019.5233  
57
- 58 471 8. Smith CA, Armour M, Zhu X, et al. Acupuncture for dysmenorrhoea. *Cochrane Database of Systematic*  
59  
60

1  
2  
3  
4  
5  
6  
7  
8  
9  
10  
11  
12  
13  
14  
15  
16  
17  
18  
19  
20  
21  
22  
23  
24  
25  
26  
27  
28  
29  
30  
31  
32  
33  
34  
35  
36  
37  
38  
39  
40  
41  
42  
43  
44  
45  
46  
47  
48  
49  
50  
51  
52  
53  
54  
55  
56  
57  
58  
59  
60

*Reviews* 2016(4):CD007854. doi: 10.1002/14651858.CD007854.pub3

9. Manheimer E, Cheng K, Wieland LS, et al. Acupuncture for hip osteoarthritis. *Cochrane Database of Systematic Reviews* 2018(5):CD013010. doi: 10.1002/14651858.Cd013010
10. Dingemann J, Plewig B, Baumann I, et al. Acupuncture in posttonsillectomy pain A prospective, double-blinded, randomized, controlled trial. *Hno* 2017;65:73-79. doi: 10.1007/s00106-016-0290-z
11. Wu M-S, Chen K-H, Chen IF, et al. The Efficacy of Acupuncture in Post-Operative Pain Management: A Systematic Review and Meta-Analysis. *Plos One* 2016;11(3):e0150367. doi: 10.1371/journal.pone.0150367
12. Li Y, Li Y, Zhang WC, et al. Effects of acupuncture in Siguan points on man-machine counteraction in respiratory failure patients during mechanical ventilation. *Zhongguo Zhong Xi Yi Jie He Za Zhi* 2006;26(10):930-32.
13. Tsay SL, Wang JC, Lin KC, et al. Effects of acupressure therapy for patients having prolonged mechanical ventilation support. *J Adv Nurs* 2005;52(2):142-50. doi: 10.1111/j.1365-2648.2005.03576.x [published Online First: 2005/09/17]
14. AminiSaman J, Mohammadi S, Karimpour H, et al. Transcutaneous Electrical Nerve Stimulation at the Acupuncture Points to Relieve Pain of Patients Under Mechanical Ventilation: A Randomized Controlled Study. *J Acupunct Meridian Stud* 2018;11(5):290-95. doi: 10.1016/j.jams.2018.06.008 [published Online First: 2018/07/24]
15. Yuan SC, Huang XI, Hua SY, et al. Effect of acupuncture on diaphragmatic function in patients with AECOPD typeII respiratory failure evaluated by ultrasound detection. *Zhongguo Zhen Jiu* 2021;41(07):703-10. doi: 10.13703/j.0255-2930.20200606-k0007

- 1  
2  
3  
4 493 16. Irnich D, Behrens N, Molzen H, et al. Randomised trial of acupuncture compared with conventional massage  
5  
6  
7 494 and "sham" laser acupuncture for treatment of chronic neck pain. *BMJ* 2001;322(7302):1574-8. doi:  
8  
9  
10 495 10.1136/bmj.322.7302.1574 [published Online First: 2001/06/30]  
11  
12 496 17. Kong JT, Puetz C, Tian L, et al. Effect of Electroacupuncture vs Sham Treatment on Change in Pain Severity  
13  
14  
15 497 Among Adults With Chronic Low Back Pain: A Randomized Clinical Trial. *JAMA Netw Open*  
16  
17  
18 498 2020;3(10):e2022787. doi: 10.1001/jamanetworkopen.2020.22787 [published Online First: 2020/10/28]  
19  
20 499 18. MacPherson H, Altman DG, Hammerschlag R, et al. Revised STandards for Reporting Interventions in  
21  
22  
23 500 Clinical Trials of Acupuncture (STRICTA): extending the CONSORT statement. *Acupuncture in*  
24  
25  
26 501 *Medicine* 2010;28(2):83-93. doi: 10.1136/aim.2009.001370  
27  
28  
29 502 19. Barr J, Fraser GL, Puntillo K, et al. Clinical Practice Guidelines for the Management of Pain, Agitation, and  
30  
31 503 Delirium in Adult Patients in the Intensive Care Unit. *Critical Care Medicine* 2013;41(1):263-306. doi:  
32  
33  
34 504 10.1097/CCM.0b013e3182783b72  
35  
36  
37 505 20. Ely EW, Truman B, Shintani A, et al. Monitoring sedation status over time in ICU patients - Reliability and  
38  
39  
40 506 validity of the Richmond Agitation-Sedation Scale (RASS). *Jama-Journal of the American Medical*  
41  
42 507 *Association* 2003;289(22):2983-91. doi: 10.1001/jama.289.22.2983  
43  
44  
45 508 21. Sessler CN, Gosnell MS, Grap MJ, et al. The Richmond Agitation-Sedation Scale - Validity and reliability in  
46  
47  
48 509 adult intensive care unit patients. *American Journal of Respiratory and Critical Care Medicine*  
49  
50 510 2002;166(10):1338-44. doi: 10.1164/rccm.2107138  
51  
52  
53 511 22. Payen JF, Bru O, Bosson JL, et al. Assessing pain in critically ill sedated patients by using a behavioral pain  
54  
55  
56 512 scale. *Critical Care Medicine* 2001;29(12):2258-63. doi: 10.1097/00003246-200112000-00004  
57  
58  
59 513 23. Chanques G, Viel E, Constantin J-M, et al. The measurement of pain in intensive care unit: Comparison of  
60

1  
2  
3  
4  
5  
6  
7  
8  
9  
10  
11  
12  
13  
14  
15  
16  
17  
18  
19  
20  
21  
22  
23  
24  
25  
26  
27  
28  
29  
30  
31  
32  
33  
34  
35  
36  
37  
38  
39  
40  
41  
42  
43  
44  
45  
46  
47  
48  
49  
50  
51  
52  
53  
54  
55  
56  
57  
58  
59  
60

5 self-report intensity scales. *Pain* 2010;151(3):711-21. doi: 10.1016/j.pain.2010.08.039

24. Girard TD, Kress JP, Fuchs BD, et al. Efficacy and safety of a paired sedation and ventilator weaning protocol for mechanically ventilated patients in intensive care (Awakening and Breathing Controlled trial): a randomised controlled trial. *Lancet* 2008;371(9607):126-34. doi: 10.1016/s0140-6736(08)60105-1
25. Subira C, Hernandez G, Vazquez A, et al. Effect of Pressure Support vs T-Piece Ventilation Strategies During Spontaneous Breathing Trials on Successful Extubation Among Patients Receiving Mechanical Ventilation A Randomized Clinical Trial. *Jama-Journal of the American Medical Association* 2019;321(22):2175-82. doi: 10.1001/jama.2019.7234
26. Hui D, Frisbee-Hume S, Wilson A, et al. Effect of Lorazepam With Haloperidol vs Haloperidol Alone on Agitated Delirium in Patients With Advanced Cancer Receiving Palliative Care A Randomized Clinical Trial. *Jama-Journal of the American Medical Association* 2017;318(11):1047-56. doi: 10.1001/jama.2017.11468
27. Carrasco G, Molina R, Costa J, et al. Propofol vs midazolam in short-, medium-, and long-term sedation of critically ill patients. A cost-benefit analysis. *Chest* 1993;103(2):557-64. doi: 10.1378/chest.103.2.557
28. Liu L, Wu A-P, Yang Y, et al. Effects of Propofol on Respiratory Drive and Patient-ventilator Synchrony during Pressure Support Ventilation in Postoperative Patients: A Prospective Study. *Chinese Medical Journal* 2017;130(10):1155-60. doi: 10.4103/0366-6999.205864
29. Kollef MH, Levy NT, Ahrens TS, et al. The use of continuous IV sedation is associated with prolongation of mechanical ventilation. *Chest* 1998;114(2):541-48. doi: 10.1378/chest.114.2.541
30. Ouimet S, Kavanagh BP, Gottfried S, et al. Incidence, risk factors and consequences of ICU delirium.

1  
2  
3  
4  
5  
6  
7  
8  
9  
10  
11  
12  
13  
14  
15  
16  
17  
18  
19  
20  
21  
22  
23  
24  
25  
26  
27  
28  
29  
30  
31  
32  
33  
34  
35  
36  
37  
38  
39  
40  
41  
42  
43  
44  
45  
46  
47  
48  
49  
50  
51  
52  
53  
54  
55  
56  
57  
58  
59  
60

*Intensive Care Medicine* 2007;33(1):66-73. doi: 10.1007/s00134-006-0399-8

31. Chanques G, Conseil M, Roger C, et al. Immediate interruption of sedation compared with usual sedation care in critically ill postoperative patients (SOS-Ventilation): a randomised, parallel-group clinical trial.

*Lancet Respiratory Medicine* 2017;5(10):795-805. doi: 10.1016/s2213-2600(17)30304-1

32. Mehta S, Burry L, Cook D, et al. Daily Sedation Interruption in Mechanically Ventilated Critically Ill Patients Cared for With a Sedation Protocol A Randomized Controlled Trial. *Jama-Journal of the American*

*Medical Association* 2012;308(19):1985-92. doi: 10.1001/jama.2012.13872

33. Asmussen S, Przkora R, Maybauer DM, et al. Meta-Analysis of Electroacupuncture in Cardiac Anesthesia and Intensive Care. *Journal of Intensive Care Medicine* 2019;34(8):652-61. doi:

10.1177/0885066617708558

34. Harris RE, Zubieta J-K, Scott DJ, et al. Traditional Chinese acupuncture and placebo (sham) acupuncture are differentiated by their effects on mu-opioid receptors (MORs). *Neuroimage* 2009;47(3):1077-85.

doi: 10.1016/j.neuroimage.2009.05.083

35. Han JS. Acupuncture: neuropeptide release produced by electrical stimulation of different frequencies.

*Trends in Neurosciences* 2003;26(1):17-22. doi: 10.1016/s0166-2236(02)00006-1

36. Wang B, Tang J, White PF, et al. Effect of the intensity of transcutaneous acupoint electrical stimulation on the postoperative analgesic requirement. *Anesth Analg* 1997;85(2):406-13. doi: 10.1097/00000539-

199708000-00029 [published Online First: 1997/08/01]

37. Usichenko TI, Dinse M, Hermsen M, et al. Auricular acupuncture for pain relief after total hip arthroplasty - a randomized controlled study. *Pain* 2005;114(3):320-27. doi: 10.1016/j.pain.2004.08.021 [published

Online First: 2005/03/22]

- 1  
2  
3  
4 556 38. White P, Lewith G, Prescott P, et al. Acupuncture versus placebo for the treatment of chronic mechanical  
5  
6  
7 557 neck pain: a randomized, controlled trial. *Ann Intern Med* 2004;141(12):911-19. doi: 10.7326/0003-  
8  
9 558 4819-141-12-200412210-00007 [published Online First: 2004/12/22]  
10  
11  
12 559 39. Gaubeca-Gilarranz A, Fernandez-de-Las-Penas C, Medina-Torres JR, et al. Effectiveness of dry needling  
13  
14  
15 560 of rectus abdominis trigger points for the treatment of primary dysmenorrhoea: a randomised parallel-  
16  
17  
18 561 group trial. *Acupunct Med* 2018;36(5):302-10. doi: 10.1136/acupmed-2017-011566 [published Online  
19  
20 562 First: 2018/05/04]  
21  
22  
23 563 40. Kennedy S, Baxter GD, Kerr DP, et al. Acupuncture for acute non-specific low back pain: a pilot randomised  
24  
25  
26 564 non-penetrating sham controlled trial. *Complement Ther Med* 2008;16(3):139-46. doi:  
27  
28  
29 565 10.1016/j.ctim.2007.03.001 [published Online First: 2008/06/07]  
30  
31 566 41. Lv Y, He H, Xie J, et al. Effects of transcutaneous acupoint electrical stimulation combined with low-dose  
32  
33  
34 567 sufentanil pretreatment on the incidence and severity of etomidate-induced myoclonus: A randomized  
35  
36  
37 568 controlled trial. *Medicine (Baltimore)* 2018;97(23):e10969. doi: 10.1097/MD.00000000000010969  
38  
39 569 [published Online First: 2018/06/08]  
40  
41  
42 570 42. Ma W, Bai W, Lin C, et al. Effects of Sanyinjiao (SP6) with electroacupuncture on labour pain in women  
43  
44  
45 571 during labour. *Complement Ther Med* 2011;19 Suppl 1:S13-8. doi: 10.1016/j.ctim.2010.09.001  
46  
47  
48 572 [published Online First: 2011/01/05]  
49  
50 573 43. Mavrommatis CI, Argyra E, Vadalouka A, et al. Acupuncture as an adjunctive therapy to pharmacological  
51  
52  
53 574 treatment in patients with chronic pain due to osteoarthritis of the knee: a 3-armed, randomized,  
54  
55  
56 575 placebo-controlled trial. *Pain* 2012;153(8):1720-26. doi: 10.1016/j.pain.2012.05.005 [published Online  
57  
58 576 First: 2012/06/26]  
59  
60



- 1  
2  
3  
4 577 44. Ng SSM, Leung WW, Mak TWC, et al. Electroacupuncture reduces duration of postoperative ileus after  
5  
6  
7 578 laparoscopic surgery for colorectal cancer. *Gastroenterology* 2013;144(2):307-13 e1. doi:  
8  
9  
10 579 10.1053/j.gastro.2012.10.050 [published Online First: 2012/11/13]  
11  
12 580 45. Sui M, Jiang N, Yan L, et al. Effect of Electroacupuncture on Shoulder Subluxation in Poststroke Patients  
13  
14  
15 581 with Hemiplegic Shoulder Pain: A Sham-Controlled Study Using Multidimensional Musculoskeletal  
16  
17  
18 582 Ultrasound Assessment. *Pain Res Manag* 2021;2021:5329881. doi: 10.1155/2021/5329881 [published  
19  
20 583 Online First: 2021/11/30]  
21  
22  
23 584 46. Tabassi KT, Amini P, Mohammadi S, et al. The effect of acupuncture on pain score after open kidney surgery.  
24  
25  
26 585 *J Complement Integr Med* 2015;12(3):241-44. doi: 10.1515/jcim-2014-0071 [published Online First:  
27  
28  
29 586 2015/04/30]  
30  
31 587 47. Wang X, Yin X, Guo XT, et al. Effects of the pestle needle therapy, a type of acupoint stimulation, on post-  
32  
33  
34 588 hemorrhoidectomy pain: A randomized controlled trial. *J Integr Med* 2020;18(6):492-98. doi:  
35  
36  
37 589 10.1016/j.joim.2020.08.001 [published Online First: 2020/08/17]  
38  
39 590 48. Wong RH, Lee TW, Sihoe AD, et al. Analgesic effect of electroacupuncture in postthoracotomy pain: a  
40  
41  
42 591 prospective randomized trial. *Ann Thorac Surg* 2006;81(6):2031-6. doi:  
43  
44  
45 592 10.1016/j.athoracsur.2005.12.064 [published Online First: 2006/05/30]  
46  
47  
48 593 49. Yu X, Zhang F, Chen B. The effect of TEAS on the quality of early recovery in patients undergoing  
49  
50 594 gynecological laparoscopic surgery: a prospective, randomized, placebo-controlled trial. *Trials*  
51  
52  
53 595 2020;21(1):43. doi: 10.1186/s13063-019-3892-4 [published Online First: 2020/01/10]  
54  
55  
56 596 50. Zheng LH, Sun H, Wang GN, et al. Effect of transcutaneous electrical acupoint stimulation on nausea and  
57  
58 597 vomiting induced by patient controlled intravenous analgesia with tramadol. *Chin J Integr Med*  
59  
60

- 1  
2  
3  
4 598 2008;14(1):61-4. doi: 10.1007/s11655-007-9006  
5  
6  
7 599 10.1007/s11655-007-9006-2 [published Online First: 2008/01/26]  
8  
9  
10 600 51. Chen J, Zhang Y, Li X, et al. Efficacy of transcutaneous electrical acupoint stimulation combined with general  
11  
12 601 anesthesia for sedation and postoperative analgesia in minimally invasive lung cancer surgery: A  
13  
14 randomized, double-blind, placebo-controlled trial. *Thorac Cancer* 2020;11(4):928-34. doi:  
15 602 10.1111/1759-7714.13343 [published Online First: 2020/02/18]  
16  
17  
18 603  
19  
20 604 52. Fleckenstein J, Baeumler P, Gurschler C, et al. Acupuncture reduces the time from extubation to 'ready for  
21  
22 discharge' from the post anaesthesia care unit: results from the randomised controlled AcuARP trial.  
23 605  
24 *Sci Rep* 2018;8(1):15734. doi: 10.1038/s41598-018-33459-y [published Online First: 2018/10/26]  
25  
26 606  
27  
28  
29 607 53. Cabrini L, Gioia L, Gemma M, et al. Bispectral index evaluation of the sedative effect of acupuncture in  
30  
31 608 healthy volunteers. *J Clin Monit Comput* 2006;20(5):311-5. doi: 10.1007/s10877-006-9026-z [published  
32  
33 Online First: 2006/09/22]  
34 609  
35  
36  
37 610 54. Zheng X, Meng JB, Fang Q. Electroacupuncture reduces the dose of midazolam monitored by the bispectral  
38  
39 611 index in critically ill patients with mechanical ventilation: an exploratory study. *Acupunct Med*  
40  
41 2012;30(2):78-84. doi: 10.1136/acupmed-2011-010095 [published Online First: 2012/03/31]  
42 612  
43  
44  
45 613 55. Feng X, Li J, Wu L, et al. Effect of combined electroacupuncture and epidural anesthesia in gynecological  
46  
47 614 operation evaluated by bispectral index. *Zhongguo Zhong Xi Yi Jie He Za Zhi* 2010;30(02):150-  
48  
49 52.(Chinese).  
50 615  
51  
52  
53 616 56. Zheng X, Wan L, Gao F, et al. Effect of ear point embedding on plasma and effect site concentrations of  
54  
55 propofol-remifentanil in elderly patients after target-controlled induction. *Zhongguo Zhen Jiu*  
56 617  
57 2017;37(08):869-73. Chinese. doi: 10.13703/j.0255-2930.2017.08.017  
58 618  
59  
60

- 1  
2  
3  
4 619 57. Lee KC, Chao YC, Lin YP, et al. Effectiveness of Self-administered Acupressure for Family Caregivers of  
5  
6  
7 620 Advanced Cancer Patients With Insomnia: A Randomized Controlled Trial. *Cancer Nurs* 2022;45(1):E1-  
8  
9  
10 621 E9. doi: 10.1097/NCC.0000000000000870 [published Online First: 2020/08/03]  
11  
12 622 58. Chen QQ, Wei QL, Zhang XH. Effects of electroacupuncture on supplementary analgesia and improvement  
13  
14  
15 623 of adverse reactions induced by dolantin in oocyte retrieval. *Zhongguo Zhen Jiu* 2012;32(12):1113-16.  
16  
17  
18 624 59. Xiao J, Yi W, Wu L. Effects of electroacupuncture on reducing labor pain and complications in the labor  
19  
20 625 analgesia process of combined spinal-epidural analgesia with patient-controlled epidural analgesia.  
21  
22  
23 626 *Arch Gynecol Obstet* 2019;299(1):123-28. doi: 10.1007/s00404-018-4955-6 [published Online First:  
24  
25  
26 627 2018/11/15]  
27  
28  
29 628 60. Chen TY, Zhou J, Wang K, et al. Electroacupuncture Intervention Combined with Anesthetics for Analgesia  
30  
31 629 and Post-surgical Gastrointestinal Recovery in Pneumectomy Patients. *Zhen Ci Yan Jiu*  
32  
33  
34 630 2019;40(6):461-64.  
35  
36  
37 631 61. Meldrum ML. A brief history of the randomized controlled trial - From oranges and lemons to the gold  
38  
39 632 standard. *Hematology-Oncology Clinics of North America* 2000;14(4):745-60. doi: 10.1016/s0889-  
40  
41  
42 633 8588(05)70309-9  
43  
44  
45 634 62. Boutron I, Guittet L, Estellat C, et al. Reporting methods of blinding in randomized trials assessing  
46  
47  
48 635 nonpharmacological treatments. *Plos Medicine* 2007;4(2):370-80. doi: 10.1371/journal.pmed.0040061  
49  
50 636 63. Chen Z-x, Li Y, Zhang X-g, et al. Sham Electroacupuncture Methods in Randomized Controlled Trials.  
51  
52  
53 637 *Scientific Reports* 2017;7:40837. doi: 10.1038/srep40837  
54  
55  
56 638 64. Lund I, Lundeberg T. Are minimal, superficial or sham acupuncture procedures acceptable as inert placebo  
57  
58 639 controls? *Acupuncture in medicine : journal of the British Medical Acupuncture Society* 2006;24(1):13-  
59  
60

1  
2  
3  
4  
5  
6  
7  
8  
9  
10  
11  
12  
13  
14  
15  
16  
17  
18  
19  
20  
21  
22  
23  
24  
25  
26  
27  
28  
29  
30  
31  
32  
33  
34  
35  
36  
37  
38  
39  
40  
41  
42  
43  
44  
45  
46  
47  
48  
49  
50  
51  
52  
53  
54  
55  
56  
57  
58  
59  
60

5.

65. Lundeberg T, Lund I, Naslund J, et al. The Emperor's sham - wrong assumption that sham needling is sham.

*Acupuncture in Medicine* 2008;26(4):239-42. doi: 10.1136/aim.26.4.239

66. Kim T-H, Lee MS, Alraek T, et al. Acupuncture in sham device controlled trials may not be as effective as

acupuncture in the real world: a preliminary network meta-analysis of studies of acupuncture for hot

flashes in menopausal women. *Acupuncture in Medicine* 2020;38(1):37-44. doi: 10.1136/acupmed-

2018-011671

**Table 1. Inclusion and exclusion criteria**

| A. Inclusion criteria                                                            | B. Exclusion criteria                                                                |
|----------------------------------------------------------------------------------|--------------------------------------------------------------------------------------|
| 1. Aged 18 years or over and under 80 years;                                     | 1. Skin lesions near the acupuncture points;                                         |
| 2. Required mechanical ventilation >24 hours;                                    | 2. Coagulopathy (bleeding time >4 min, thrombocytes <50,000/ $\mu$ l);               |
| 3. Continuous intravenous administration of sedative and analgesic medications;  | 3. Hypohepatia with Childs-Pugh class B or C;                                        |
| 4. Willingness to provide informed consent prior to enrollment;                  | 4. Second- or third-degree atrioventricular block;                                   |
| 5. Be able to comply with all follow-up evaluations (in investigator's opinion). | 5. Severe dementia;                                                                  |
|                                                                                  | 6. Psychiatric disorder;                                                             |
|                                                                                  | 7. Neurological disease;                                                             |
|                                                                                  | 8. Active seizures;                                                                  |
|                                                                                  | 9. Alcohol or drug abuse;                                                            |
|                                                                                  | 10. Benzodiazepine dependency;                                                       |
|                                                                                  | 11. Moribund state with the planned withdrawal of life support;                      |
|                                                                                  | 12. Family or physician refusal;                                                     |
|                                                                                  | 13. Pregnancy or lactation;                                                          |
|                                                                                  | 14. Currently participated in any other investigational therapeutic or device trial. |

1  
2  
3  
4  
5  
6  
7  
8  
9  
10  
11  
12  
13  
14  
15  
16  
17  
18  
19  
20  
21  
22  
23  
24  
25  
26  
27  
28  
29  
30  
31  
32  
33  
34  
35  
36  
37  
38  
39  
40  
41  
42  
43  
44  
45  
46  
47  
48  
49  
50  
51  
52  
53  
54  
55  
56  
57  
58  
59  
60

652 Figure legend:

653 Figure 1. Trial design of PASSION study

654 Figure 2. Illustration of the sham points

655 Figure 3. Forest plot of AC group versus NAC group.

656 Figure 4. Forest plot of AC group versus NAC group.

For peer review only

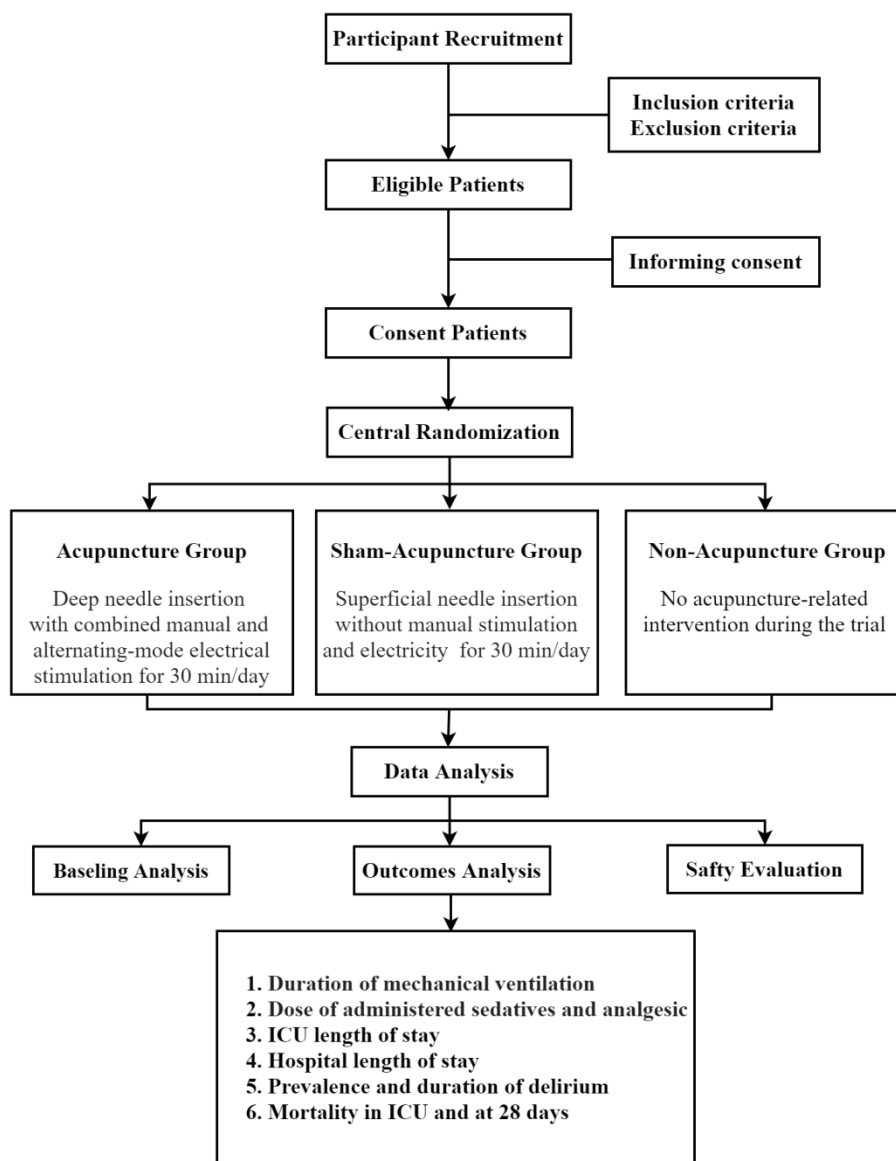

Figure1

543x691mm (72 x 72 DPI)

1  
2  
3  
4  
5  
6  
7  
8  
9  
10  
11  
12  
13  
14  
15  
16  
17  
18  
19  
20  
21  
22  
23  
24  
25  
26  
27  
28  
29  
30  
31  
32  
33  
34  
35  
36  
37  
38  
39  
40  
41  
42  
43  
44  
45  
46  
47  
48  
49  
50  
51  
52  
53  
54  
55  
56  
57  
58  
59  
60

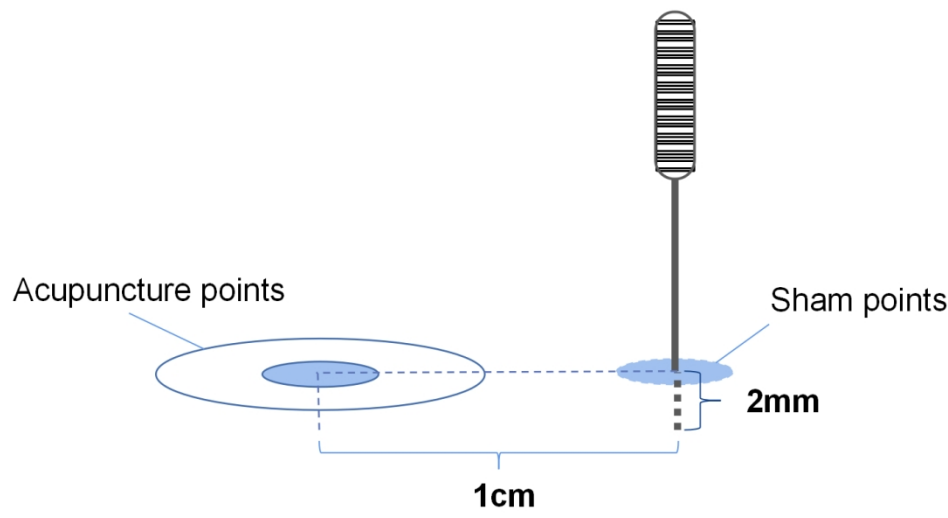

Figure2

1005x559mm (38 x 38 DPI)



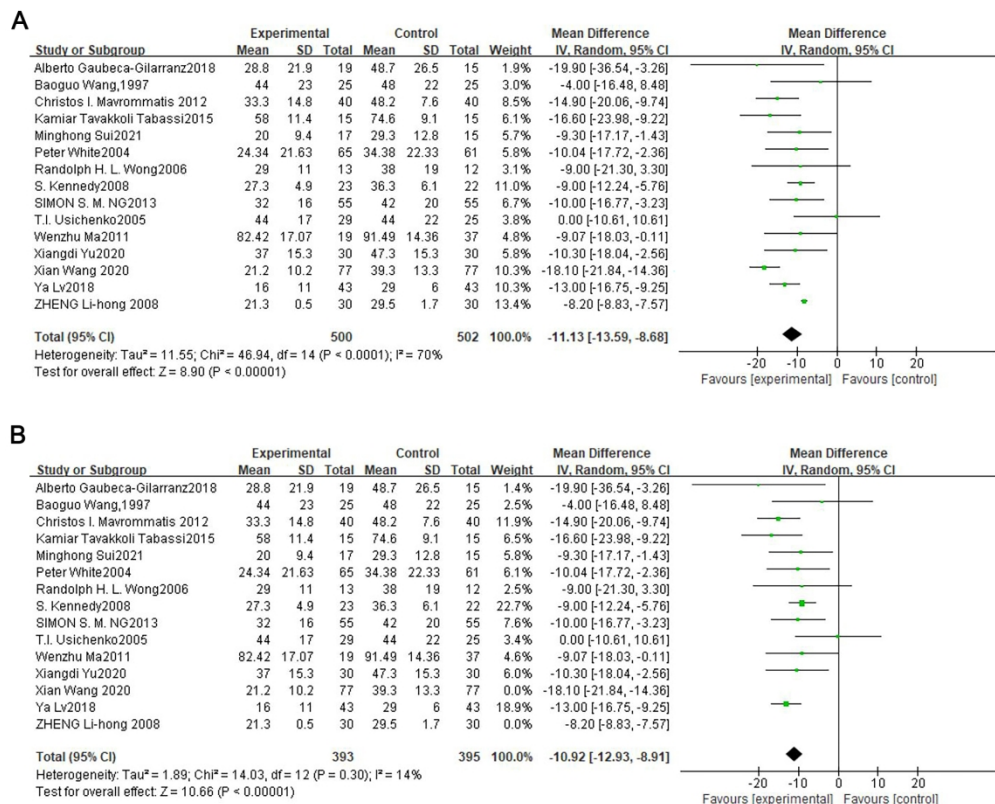

Figure3

199x162mm (300 x 300 DPI)

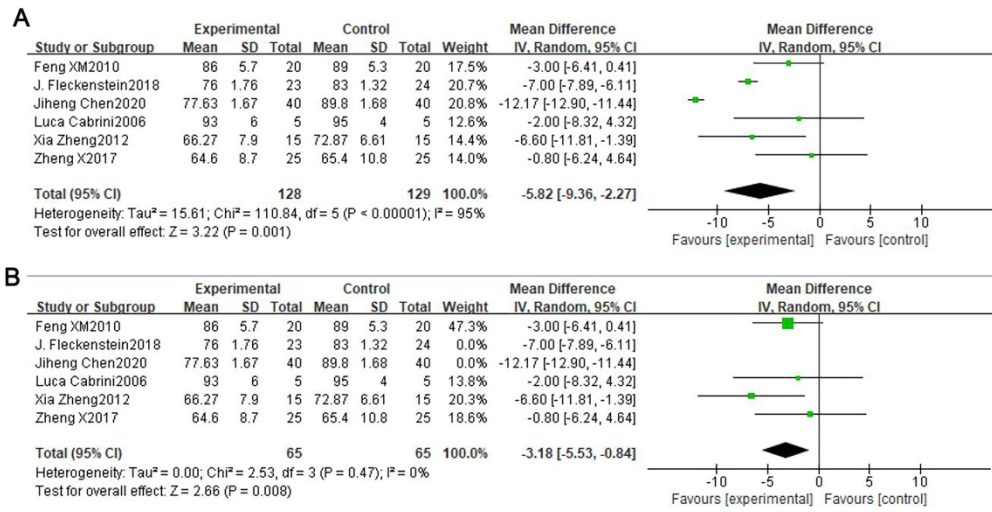

Figure 4

199x101mm (300 x 300 DPI)

# Reporting checklist for protocol of a clinical trial.

Based on the SPIRIT guidelines.

## Instructions to authors

Complete this checklist by entering the page numbers from your manuscript where readers will find each of the items listed below.

Your article may not currently address all the items on the checklist. Please modify your text to include the missing information. If you are certain that an item does not apply, please write "n/a" and provide a short explanation.

Upload your completed checklist as an extra file when you submit to a journal.

In your methods section, say that you used the SPIRIT reporting guidelines, and cite them as:

Chan A-W, Tetzlaff JM, Gøtzsche PC, Altman DG, Mann H, Berlin J, Dickersin K, Hróbjartsson A, Schulz KF, Parulekar WR, Krleža-Jerić K, Laupacis A, Moher D. SPIRIT 2013 Explanation and Elaboration: Guidance for protocols of clinical trials. *BMJ*. 2013;346:e7586

|                                   |                     | Reporting Item                                                                                               | Page Number                           |
|-----------------------------------|---------------------|--------------------------------------------------------------------------------------------------------------|---------------------------------------|
| <b>Administrative information</b> |                     |                                                                                                              |                                       |
| Title                             | <a href="#">#1</a>  | Descriptive title identifying the study design, population, interventions, and, if applicable, trial acronym | Page 1, line 1-4.                     |
| Trial registration                | <a href="#">#2a</a> | Trial identifier and registry name. If not yet registered, name of intended registry                         | Page 3, line 58;<br>Page 7, line 130. |
| Trial registration: data set      | <a href="#">#2b</a> | All items from the World Health Organization Trial Registration Data Set                                     | n/a                                   |
| Protocol version                  | <a href="#">#3</a>  | Date and version identifier                                                                                  | n/a                                   |
| Funding                           | <a href="#">#4</a>  | Sources and types of financial, material, and other support                                                  | Page 18, line 427-434.                |

|    |                      |                     |                                                          |           |
|----|----------------------|---------------------|----------------------------------------------------------|-----------|
| 1  | Roles and            | <a href="#">#5a</a> | Names, affiliations, and roles of protocol contributors  | Page 1;   |
| 2  | responsibilities:    |                     |                                                          |           |
| 3  | contributorship      |                     |                                                          | Page 18-  |
| 4  |                      |                     |                                                          | 19, line  |
| 5  |                      |                     |                                                          | 444-449.  |
| 6  |                      |                     |                                                          |           |
| 7  |                      |                     |                                                          |           |
| 8  | Roles and            | <a href="#">#5b</a> | Name and contact information for the trial sponsor       | Page 18,  |
| 9  | responsibilities:    |                     |                                                          | line 427- |
| 10 | sponsor contact      |                     |                                                          | 434.      |
| 11 | information          |                     |                                                          |           |
| 12 |                      |                     |                                                          |           |
| 13 |                      |                     |                                                          |           |
| 14 |                      |                     |                                                          |           |
| 15 | Roles and            | <a href="#">#5c</a> | Role of study sponsor and funders, if any, in study      | Page 18,  |
| 16 | responsibilities:    |                     | design; collection, management, analysis, and            | line 435- |
| 17 | sponsor and funder   |                     | interpretation of data; writing of the report; and the   | 438.      |
| 18 |                      |                     | decision to submit the report for publication, including |           |
| 19 |                      |                     | whether they will have ultimate authority over any of    |           |
| 20 |                      |                     | these activities                                         |           |
| 21 |                      |                     |                                                          |           |
| 22 |                      |                     |                                                          |           |
| 23 |                      |                     |                                                          |           |
| 24 |                      |                     |                                                          |           |
| 25 | Roles and            | <a href="#">#5d</a> | Composition, roles, and responsibilities of the          | Page 13,  |
| 26 | responsibilities:    |                     | coordinating centre, steering committee, endpoint        | line 290- |
| 27 | committees           |                     | adjudication committee, data management team, and        | 292.      |
| 28 |                      |                     | other individuals or groups overseeing the trial, if     |           |
| 29 |                      |                     | applicable (see Item 21a for data monitoring committee)  |           |
| 30 |                      |                     |                                                          |           |
| 31 |                      |                     |                                                          |           |
| 32 |                      |                     |                                                          |           |
| 33 | <b>Introduction</b>  |                     |                                                          |           |
| 34 |                      |                     |                                                          |           |
| 35 |                      |                     |                                                          |           |
| 36 | Background and       | <a href="#">#6a</a> | Description of research question and justification for   | Page 5,   |
| 37 | rationale            |                     | undertaking the trial, including summary of relevant     | line 77-  |
| 38 |                      |                     | studies (published and unpublished) examining benefits   | 100.      |
| 39 |                      |                     | and harms for each intervention                          |           |
| 40 |                      |                     |                                                          |           |
| 41 |                      |                     |                                                          |           |
| 42 |                      |                     |                                                          |           |
| 43 | Background and       | <a href="#">#6b</a> | Explanation for choice of comparators                    | Page 6,   |
| 44 | rationale: choice of |                     |                                                          | line 106- |
| 45 | comparators          |                     |                                                          | 107.      |
| 46 |                      |                     |                                                          |           |
| 47 |                      |                     |                                                          |           |
| 48 | Objectives           | <a href="#">#7</a>  | Specific objectives or hypotheses                        | Page 6,   |
| 49 |                      |                     |                                                          | line 103- |
| 50 |                      |                     |                                                          | 107.      |
| 51 |                      |                     |                                                          |           |
| 52 |                      |                     |                                                          |           |
| 53 | Trial design         | <a href="#">#8</a>  | Description of trial design including type of trial (eg, | Page 5-6, |
| 54 |                      |                     | parallel group, crossover, factorial, single group),     | line 101- |
| 55 |                      |                     | allocation ratio, and framework (eg, superiority,        | 103.      |
| 56 |                      |                     | equivalence, non-inferiority, exploratory)               |           |
| 57 |                      |                     |                                                          |           |
| 58 |                      |                     |                                                          |           |
| 59 |                      |                     |                                                          |           |
| 60 |                      |                     |                                                          |           |

1 **Methods:**

2 **Participants,**

3 **interventions, and**

4 **outcomes**

5

6

7

8 Study setting [#9](#) Description of study settings (eg, community clinic, Page 6,  
9 academic hospital) and list of countries where data will line 112-  
10 be collected. Reference to where list of study sites can 113.  
11 be obtained

12

13

14 Eligibility criteria [#10](#) Inclusion and exclusion criteria for participants. If Page 7-8,  
15 applicable, eligibility criteria for study centres and line 144-  
16 individuals who will perform the interventions (eg, 157.  
17 surgeons, psychotherapists) Page 8,  
18 line 159-  
19 164;  
20 Page 10,  
21 line 210-  
22 213;  
23

24

25

26

27

28

29

30

31

32

33 Interventions: [#11a](#) Interventions for each group with sufficient detail to allow Page 9-  
34 description 10, line  
35 188-213;  
36 administered

37

38

39

40

41 Interventions: [#11b](#) Criteria for discontinuing or modifying allocated Page 13,  
42 modifications 10, line 286-  
43 290;  
44 change in response to harms, participant request, or  
45 improving / worsening disease)  
46

47

48 Interventions: [#11c](#) Strategies to improve adherence to intervention Page 8,  
49 adherence 10, line 207-  
50 (eg, drug tablet return; laboratory tests) 209.  
51

52

53

54

55

56 Interventions: [#11d](#) Relevant concomitant care and interventions that are n/a  
57 concomitant care permitted or prohibited during the trial  
58

59

60

|    |                                                            |                      |                                                                                                                                                                                                                                                                                                                                                                                |                        |
|----|------------------------------------------------------------|----------------------|--------------------------------------------------------------------------------------------------------------------------------------------------------------------------------------------------------------------------------------------------------------------------------------------------------------------------------------------------------------------------------|------------------------|
| 1  | Outcomes                                                   | <a href="#">#12</a>  | Primary, secondary, and other outcomes, including the specific measurement variable (eg, systolic blood pressure), analysis metric (eg, change from baseline, final value, time to event), method of aggregation (eg, median, proportion), and time point for each outcome. Explanation of the clinical relevance of chosen efficacy and harm outcomes is strongly recommended | Page 13, line 294-302; |
| 2  |                                                            |                      |                                                                                                                                                                                                                                                                                                                                                                                |                        |
| 3  |                                                            |                      |                                                                                                                                                                                                                                                                                                                                                                                |                        |
| 4  |                                                            |                      |                                                                                                                                                                                                                                                                                                                                                                                |                        |
| 5  |                                                            |                      |                                                                                                                                                                                                                                                                                                                                                                                |                        |
| 6  |                                                            |                      |                                                                                                                                                                                                                                                                                                                                                                                |                        |
| 7  |                                                            |                      |                                                                                                                                                                                                                                                                                                                                                                                |                        |
| 8  |                                                            |                      |                                                                                                                                                                                                                                                                                                                                                                                |                        |
| 9  |                                                            |                      |                                                                                                                                                                                                                                                                                                                                                                                |                        |
| 10 |                                                            |                      |                                                                                                                                                                                                                                                                                                                                                                                |                        |
| 11 |                                                            |                      |                                                                                                                                                                                                                                                                                                                                                                                |                        |
| 12 | Participant timeline                                       | <a href="#">#13</a>  | Time schedule of enrolment, interventions (including any run-ins and washouts), assessments, and visits for participants. A schematic diagram is highly recommended (see Figure)                                                                                                                                                                                               | Page 9, line 183-187.  |
| 13 |                                                            |                      |                                                                                                                                                                                                                                                                                                                                                                                |                        |
| 14 |                                                            |                      |                                                                                                                                                                                                                                                                                                                                                                                |                        |
| 15 |                                                            |                      |                                                                                                                                                                                                                                                                                                                                                                                |                        |
| 16 |                                                            |                      |                                                                                                                                                                                                                                                                                                                                                                                |                        |
| 17 |                                                            |                      |                                                                                                                                                                                                                                                                                                                                                                                |                        |
| 18 |                                                            |                      |                                                                                                                                                                                                                                                                                                                                                                                |                        |
| 19 |                                                            |                      |                                                                                                                                                                                                                                                                                                                                                                                |                        |
| 20 | Sample size                                                | <a href="#">#14</a>  | Estimated number of participants needed to achieve study objectives and how it was determined, including clinical and statistical assumptions supporting any sample size calculations                                                                                                                                                                                          | Page 14, line 325-331; |
| 21 |                                                            |                      |                                                                                                                                                                                                                                                                                                                                                                                |                        |
| 22 |                                                            |                      |                                                                                                                                                                                                                                                                                                                                                                                |                        |
| 23 |                                                            |                      |                                                                                                                                                                                                                                                                                                                                                                                |                        |
| 24 |                                                            |                      |                                                                                                                                                                                                                                                                                                                                                                                |                        |
| 25 |                                                            |                      |                                                                                                                                                                                                                                                                                                                                                                                |                        |
| 26 |                                                            |                      |                                                                                                                                                                                                                                                                                                                                                                                |                        |
| 27 |                                                            |                      |                                                                                                                                                                                                                                                                                                                                                                                |                        |
| 28 | Recruitment                                                | <a href="#">#15</a>  | Strategies for achieving adequate participant enrolment to reach target sample size                                                                                                                                                                                                                                                                                            | Page 14, line 330-331. |
| 29 |                                                            |                      |                                                                                                                                                                                                                                                                                                                                                                                |                        |
| 30 |                                                            |                      |                                                                                                                                                                                                                                                                                                                                                                                |                        |
| 31 |                                                            |                      |                                                                                                                                                                                                                                                                                                                                                                                |                        |
| 32 |                                                            |                      |                                                                                                                                                                                                                                                                                                                                                                                |                        |
| 33 |                                                            |                      |                                                                                                                                                                                                                                                                                                                                                                                |                        |
| 34 |                                                            |                      |                                                                                                                                                                                                                                                                                                                                                                                |                        |
| 35 | <b>Methods:</b>                                            |                      |                                                                                                                                                                                                                                                                                                                                                                                |                        |
| 36 | <b>Assignment of interventions (for controlled trials)</b> |                      |                                                                                                                                                                                                                                                                                                                                                                                |                        |
| 37 |                                                            |                      |                                                                                                                                                                                                                                                                                                                                                                                |                        |
| 38 |                                                            |                      |                                                                                                                                                                                                                                                                                                                                                                                |                        |
| 39 |                                                            |                      |                                                                                                                                                                                                                                                                                                                                                                                |                        |
| 40 |                                                            |                      |                                                                                                                                                                                                                                                                                                                                                                                |                        |
| 41 |                                                            |                      |                                                                                                                                                                                                                                                                                                                                                                                |                        |
| 42 | Allocation: sequence generation                            | <a href="#">#16a</a> | Method of generating the allocation sequence (eg, computer-generated random numbers), and list of any factors for stratification. To reduce predictability of a random sequence, details of any planned restriction (eg, blocking) should be provided in a separate document that is unavailable to those who enrol participants or assign interventions                       | Page 8, line 166-175.  |
| 43 |                                                            |                      |                                                                                                                                                                                                                                                                                                                                                                                |                        |
| 44 |                                                            |                      |                                                                                                                                                                                                                                                                                                                                                                                |                        |
| 45 |                                                            |                      |                                                                                                                                                                                                                                                                                                                                                                                |                        |
| 46 |                                                            |                      |                                                                                                                                                                                                                                                                                                                                                                                |                        |
| 47 |                                                            |                      |                                                                                                                                                                                                                                                                                                                                                                                |                        |
| 48 |                                                            |                      |                                                                                                                                                                                                                                                                                                                                                                                |                        |
| 49 |                                                            |                      |                                                                                                                                                                                                                                                                                                                                                                                |                        |
| 50 |                                                            |                      |                                                                                                                                                                                                                                                                                                                                                                                |                        |
| 51 |                                                            |                      |                                                                                                                                                                                                                                                                                                                                                                                |                        |
| 52 |                                                            |                      |                                                                                                                                                                                                                                                                                                                                                                                |                        |
| 53 | Allocation concealment mechanism                           | <a href="#">#16b</a> | Mechanism of implementing the allocation sequence (eg, central telephone; sequentially numbered, opaque, sealed envelopes), describing any steps to conceal the sequence until interventions are assigned                                                                                                                                                                      | Page 8, line 166-175.  |
| 54 |                                                            |                      |                                                                                                                                                                                                                                                                                                                                                                                |                        |
| 55 |                                                            |                      |                                                                                                                                                                                                                                                                                                                                                                                |                        |
| 56 |                                                            |                      |                                                                                                                                                                                                                                                                                                                                                                                |                        |
| 57 |                                                            |                      |                                                                                                                                                                                                                                                                                                                                                                                |                        |
| 58 |                                                            |                      |                                                                                                                                                                                                                                                                                                                                                                                |                        |
| 59 |                                                            |                      |                                                                                                                                                                                                                                                                                                                                                                                |                        |
| 60 |                                                            |                      |                                                                                                                                                                                                                                                                                                                                                                                |                        |

|    |                        |                      |                                                             |           |
|----|------------------------|----------------------|-------------------------------------------------------------|-----------|
| 1  | Allocation:            | <a href="#">#16c</a> | Who will generate the allocation sequence, who will         | Page 8,   |
| 2  | implementation         |                      | enrol participants, and who will assign participants to     | line 169- |
| 3  |                        |                      | interventions                                               | 175.      |
| 4  |                        |                      |                                                             |           |
| 5  |                        |                      |                                                             |           |
| 6  | Blinding (masking)     | <a href="#">#17a</a> | Who will be blinded after assignment to interventions       | Page 8,   |
| 7  |                        |                      | (eg, trial participants, care providers, outcome            | line 179- |
| 8  |                        |                      | assessors, data analysts), and how                          | 181.      |
| 9  |                        |                      |                                                             |           |
| 10 |                        |                      |                                                             |           |
| 11 |                        |                      |                                                             |           |
| 12 |                        |                      |                                                             |           |
| 13 |                        |                      |                                                             |           |
| 14 | Blinding (masking):    | <a href="#">#17b</a> | If blinded, circumstances under which unblinding is         | Page 13,  |
| 15 | emergency unblinding   |                      | permissible, and procedure for revealing a participant's    | line 286- |
| 16 |                        |                      | allocated intervention during the trial                     | 290.      |
| 17 |                        |                      |                                                             |           |
| 18 |                        |                      |                                                             |           |
| 19 |                        |                      |                                                             |           |
| 20 |                        |                      |                                                             |           |
| 21 | <b>Methods: Data</b>   |                      |                                                             |           |
| 22 | <b>collection,</b>     |                      |                                                             |           |
| 23 | <b>management, and</b> |                      |                                                             |           |
| 24 | <b>analysis</b>        |                      |                                                             |           |
| 25 |                        |                      |                                                             |           |
| 26 |                        |                      |                                                             |           |
| 27 |                        |                      |                                                             |           |
| 28 | Data collection plan   | <a href="#">#18a</a> | Plans for assessment and collection of outcome,             | Page 13-  |
| 29 |                        |                      | baseline, and other trial data, including any related       | 14,       |
| 30 |                        |                      | processes to promote data quality (eg, duplicate            | line 309- |
| 31 |                        |                      | measurements, training of assessors) and a description      | 320.      |
| 32 |                        |                      | of study instruments (eg, questionnaires, laboratory        |           |
| 33 |                        |                      | tests) along with their reliability and validity, if known. |           |
| 34 |                        |                      | Reference to where data collection forms can be found,      |           |
| 35 |                        |                      | if not in the protocol                                      |           |
| 36 |                        |                      |                                                             |           |
| 37 |                        |                      |                                                             |           |
| 38 |                        |                      |                                                             |           |
| 39 |                        |                      |                                                             |           |
| 40 |                        |                      |                                                             |           |
| 41 | Data collection plan:  | <a href="#">#18b</a> | Plans to promote participant retention and complete         | Page 10,  |
| 42 | retention              |                      | follow-up, including list of any outcome data to be         | line 207- |
| 43 |                        |                      | collected for participants who discontinue or deviate from  | 209.      |
| 44 |                        |                      | intervention protocols                                      |           |
| 45 |                        |                      |                                                             |           |
| 46 |                        |                      |                                                             |           |
| 47 |                        |                      |                                                             |           |
| 48 |                        |                      |                                                             |           |
| 49 | Data management        | <a href="#">#19</a>  | Plans for data entry, coding, security, and storage,        | Page 14,  |
| 50 |                        |                      | including any related processes to promote data quality     | line 320  |
| 51 |                        |                      | (eg, double data entry; range checks for data values).      |           |
| 52 |                        |                      | Reference to where details of data management               |           |
| 53 |                        |                      | procedures can be found, if not in the protocol             |           |
| 54 |                        |                      |                                                             |           |
| 55 |                        |                      |                                                             |           |
| 56 |                        |                      |                                                             |           |
| 57 | Statistics: outcomes   | <a href="#">#20a</a> | Statistical methods for analysing primary and secondary     | Page 14-  |
| 58 |                        |                      | outcomes. Reference to where other details of the           | 15, line  |
| 59 |                        |                      |                                                             |           |
| 60 |                        |                      |                                                             |           |



|    |                            |                                                                                  |           |
|----|----------------------------|----------------------------------------------------------------------------------|-----------|
| 1  |                            | statistical analysis plan can be found, if not in the                            | 332-349.  |
| 2  |                            | protocol                                                                         |           |
| 3  |                            |                                                                                  |           |
| 4  |                            |                                                                                  |           |
| 5  | Statistics: additional     | <a href="#">#20b</a> Methods for any additional analyses (eg, subgroup and       | Page14,   |
| 6  | analyses                   | adjusted analyses)                                                               | line 337- |
| 7  |                            |                                                                                  | 338.      |
| 8  |                            |                                                                                  |           |
| 9  |                            |                                                                                  |           |
| 10 |                            |                                                                                  |           |
| 11 |                            |                                                                                  |           |
| 12 | Statistics: analysis       | <a href="#">#20c</a> Definition of analysis population relating to protocol non- | Page14,   |
| 13 | population and             | adherence (eg, as randomised analysis), and any                                  | line 337- |
| 14 | missing data               | statistical methods to handle missing data (eg, multiple                         | 338.      |
| 15 |                            | imputation)                                                                      |           |
| 16 |                            |                                                                                  |           |
| 17 |                            |                                                                                  |           |
| 18 |                            |                                                                                  |           |
| 19 | <b>Methods: Monitoring</b> |                                                                                  |           |
| 20 |                            |                                                                                  |           |
| 21 | Data monitoring:           | <a href="#">#21a</a> Composition of data monitoring committee (DMC);             | Page13,   |
| 22 | formal committee           | summary of its role and reporting structure; statement of                        | line 290- |
| 23 |                            | whether it is independent from the sponsor and                                   | 292.      |
| 24 |                            | competing interests; and reference to where further                              |           |
| 25 |                            | details about its charter can be found, if not in the                            |           |
| 26 |                            | protocol. Alternatively, an explanation of why a DMC is                          |           |
| 27 |                            | not needed                                                                       |           |
| 28 |                            |                                                                                  |           |
| 29 |                            |                                                                                  |           |
| 30 |                            |                                                                                  |           |
| 31 |                            |                                                                                  |           |
| 32 |                            |                                                                                  |           |
| 33 | Data monitoring:           | <a href="#">#21b</a> Description of any interim analyses and stopping            | n/a       |
| 34 | interim analysis           | guidelines, including who will have access to these                              |           |
| 35 |                            | interim results and make the final decision to terminate                         |           |
| 36 |                            | the trial                                                                        |           |
| 37 |                            |                                                                                  |           |
| 38 |                            |                                                                                  |           |
| 39 |                            |                                                                                  |           |
| 40 | Harms                      | <a href="#">#22</a> Plans for collecting, assessing, reporting, and managing     | Page12,   |
| 41 |                            | solicited and spontaneously reported adverse events                              | line 286- |
| 42 |                            | and other unintended effects of trial interventions or trial                     | 292.      |
| 43 |                            | conduct                                                                          |           |
| 44 |                            |                                                                                  |           |
| 45 |                            |                                                                                  |           |
| 46 | Auditing                   | <a href="#">#23</a> Frequency and procedures for auditing trial conduct, if      | n/a       |
| 47 |                            | any, and whether the process will be independent from                            |           |
| 48 |                            | investigators and the sponsor                                                    |           |
| 49 |                            |                                                                                  |           |
| 50 |                            |                                                                                  |           |
| 51 |                            |                                                                                  |           |
| 52 | <b>Ethics and</b>          |                                                                                  |           |
| 53 | <b>dissemination</b>       |                                                                                  |           |
| 54 |                            |                                                                                  |           |
| 55 |                            |                                                                                  |           |
| 56 | Research ethics            | <a href="#">#24</a> Plans for seeking research ethics committee /                | Page 6-7, |
| 57 | approval                   | institutional review board (REC / IRB) approval                                  | line127-  |
| 58 |                            |                                                                                  | 129.      |
| 59 |                            |                                                                                  |           |
| 60 |                            |                                                                                  |           |



|    |                                             |                      |                                                                                                                                                                                                                                                                                     |                          |
|----|---------------------------------------------|----------------------|-------------------------------------------------------------------------------------------------------------------------------------------------------------------------------------------------------------------------------------------------------------------------------------|--------------------------|
| 1  | Protocol amendments                         | <a href="#">#25</a>  | Plans for communicating important protocol modifications (eg, changes to eligibility criteria, outcomes, analyses) to relevant parties (eg, investigators, REC / IRBs, trial participants, trial registries, journals, regulators)                                                  | n/a                      |
| 2  |                                             |                      |                                                                                                                                                                                                                                                                                     |                          |
| 3  |                                             |                      |                                                                                                                                                                                                                                                                                     |                          |
| 4  |                                             |                      |                                                                                                                                                                                                                                                                                     |                          |
| 5  |                                             |                      |                                                                                                                                                                                                                                                                                     |                          |
| 6  |                                             |                      |                                                                                                                                                                                                                                                                                     |                          |
| 7  |                                             |                      |                                                                                                                                                                                                                                                                                     |                          |
| 8  |                                             |                      |                                                                                                                                                                                                                                                                                     |                          |
| 9  | Consent or assent                           | <a href="#">#26a</a> | Who will obtain informed consent or assent from potential trial participants or authorised surrogates, and how (see Item 32)                                                                                                                                                        | Page 7, line135-137.     |
| 10 |                                             |                      |                                                                                                                                                                                                                                                                                     |                          |
| 11 |                                             |                      |                                                                                                                                                                                                                                                                                     |                          |
| 12 |                                             |                      |                                                                                                                                                                                                                                                                                     |                          |
| 13 |                                             |                      |                                                                                                                                                                                                                                                                                     |                          |
| 14 | Consent or assent: ancillary studies        | <a href="#">#26b</a> | Additional consent provisions for collection and use of participant data and biological specimens in ancillary studies, if applicable                                                                                                                                               | n/a                      |
| 15 |                                             |                      |                                                                                                                                                                                                                                                                                     |                          |
| 16 |                                             |                      |                                                                                                                                                                                                                                                                                     |                          |
| 17 |                                             |                      |                                                                                                                                                                                                                                                                                     |                          |
| 18 |                                             |                      |                                                                                                                                                                                                                                                                                     |                          |
| 19 |                                             |                      |                                                                                                                                                                                                                                                                                     |                          |
| 20 | Confidentiality                             | <a href="#">#27</a>  | How personal information about potential and enrolled participants will be collected, shared, and maintained in order to protect confidentiality before, during, and after the trial                                                                                                | Page13-14, line 309-320. |
| 21 |                                             |                      |                                                                                                                                                                                                                                                                                     |                          |
| 22 |                                             |                      |                                                                                                                                                                                                                                                                                     |                          |
| 23 |                                             |                      |                                                                                                                                                                                                                                                                                     |                          |
| 24 |                                             |                      |                                                                                                                                                                                                                                                                                     |                          |
| 25 |                                             |                      |                                                                                                                                                                                                                                                                                     |                          |
| 26 |                                             |                      |                                                                                                                                                                                                                                                                                     |                          |
| 27 | Declaration of interests                    | <a href="#">#28</a>  | Financial and other competing interests for principal investigators for the overall trial and each study site                                                                                                                                                                       | n/a                      |
| 28 |                                             |                      |                                                                                                                                                                                                                                                                                     |                          |
| 29 |                                             |                      |                                                                                                                                                                                                                                                                                     |                          |
| 30 |                                             |                      |                                                                                                                                                                                                                                                                                     |                          |
| 31 | Data access                                 | <a href="#">#29</a>  | Statement of who will have access to the final trial dataset, and disclosure of contractual agreements that limit such access for investigators                                                                                                                                     | n/a                      |
| 32 |                                             |                      |                                                                                                                                                                                                                                                                                     |                          |
| 33 |                                             |                      |                                                                                                                                                                                                                                                                                     |                          |
| 34 |                                             |                      |                                                                                                                                                                                                                                                                                     |                          |
| 35 |                                             |                      |                                                                                                                                                                                                                                                                                     |                          |
| 36 | Ancillary and post trial care               | <a href="#">#30</a>  | Provisions, if any, for ancillary and post-trial care, and for compensation to those who suffer harm from trial participation                                                                                                                                                       | n/a                      |
| 37 |                                             |                      |                                                                                                                                                                                                                                                                                     |                          |
| 38 |                                             |                      |                                                                                                                                                                                                                                                                                     |                          |
| 39 |                                             |                      |                                                                                                                                                                                                                                                                                     |                          |
| 40 |                                             |                      |                                                                                                                                                                                                                                                                                     |                          |
| 41 | Dissemination policy: trial results         | <a href="#">#31a</a> | Plans for investigators and sponsor to communicate trial results to participants, healthcare professionals, the public, and other relevant groups (eg, via publication, reporting in results databases, or other data sharing arrangements), including any publication restrictions | n/a                      |
| 42 |                                             |                      |                                                                                                                                                                                                                                                                                     |                          |
| 43 |                                             |                      |                                                                                                                                                                                                                                                                                     |                          |
| 44 |                                             |                      |                                                                                                                                                                                                                                                                                     |                          |
| 45 |                                             |                      |                                                                                                                                                                                                                                                                                     |                          |
| 46 |                                             |                      |                                                                                                                                                                                                                                                                                     |                          |
| 47 |                                             |                      |                                                                                                                                                                                                                                                                                     |                          |
| 48 |                                             |                      |                                                                                                                                                                                                                                                                                     |                          |
| 49 | Dissemination policy: authorship            | <a href="#">#31b</a> | Authorship eligibility guidelines and any intended use of professional writers                                                                                                                                                                                                      | n/a                      |
| 50 |                                             |                      |                                                                                                                                                                                                                                                                                     |                          |
| 51 |                                             |                      |                                                                                                                                                                                                                                                                                     |                          |
| 52 |                                             |                      |                                                                                                                                                                                                                                                                                     |                          |
| 53 | Dissemination policy: reproducible research | <a href="#">#31c</a> | Plans, if any, for granting public access to the full protocol, participant-level dataset, and statistical code                                                                                                                                                                     | n/a                      |
| 54 |                                             |                      |                                                                                                                                                                                                                                                                                     |                          |
| 55 |                                             |                      |                                                                                                                                                                                                                                                                                     |                          |
| 56 |                                             |                      |                                                                                                                                                                                                                                                                                     |                          |

## Appendices

|    |                      |                     |                                                               |     |
|----|----------------------|---------------------|---------------------------------------------------------------|-----|
| 1  | Informed consent     | <a href="#">#32</a> | Model consent form and other related documentation            | n/a |
| 2  | materials            |                     | given to participants and authorised surrogates               |     |
| 3  |                      |                     |                                                               |     |
| 4  |                      |                     |                                                               |     |
| 5  | Biological specimens | <a href="#">#33</a> | Plans for collection, laboratory evaluation, and storage of   | n/a |
| 6  |                      |                     | biological specimens for genetic or molecular analysis in     |     |
| 7  |                      |                     | the current trial and for future use in ancillary studies, if |     |
| 8  |                      |                     | applicable                                                    |     |
| 9  |                      |                     |                                                               |     |
| 10 |                      |                     |                                                               |     |

11 None The SPIRIT Explanation and Elaboration paper is distributed under the terms of the Creative  
12 Commons Attribution License CC-BY-NC. This checklist can be completed online using  
13 <https://www.goodreports.org/>, a tool made by the [EQUATOR Network](#) in collaboration with  
14 [Penelope.ai](#)  
15  
16  
17  
18  
19  
20  
21  
22  
23  
24  
25  
26  
27  
28  
29  
30  
31  
32  
33  
34  
35  
36  
37  
38  
39  
40  
41  
42  
43  
44  
45  
46  
47  
48  
49  
50  
51  
52  
53  
54  
55  
56  
57  
58  
59  
60

# BMJ Open

**Prospective comparison of acupuncture with sham acupuncture to determine impact on sedation and analgesia in mechanically ventilated critically ill patients (PASSION study): protocol for a randomized controlled trial**

|                                 |                                                                                                                                                                                                                                                                                                                                                                                                                                                     |
|---------------------------------|-----------------------------------------------------------------------------------------------------------------------------------------------------------------------------------------------------------------------------------------------------------------------------------------------------------------------------------------------------------------------------------------------------------------------------------------------------|
| Journal:                        | <i>BMJ Open</i>                                                                                                                                                                                                                                                                                                                                                                                                                                     |
| Manuscript ID                   | bmjopen-2021-059741.R2                                                                                                                                                                                                                                                                                                                                                                                                                              |
| Article Type:                   | Protocol                                                                                                                                                                                                                                                                                                                                                                                                                                            |
| Date Submitted by the Author:   | 12-Aug-2022                                                                                                                                                                                                                                                                                                                                                                                                                                         |
| Complete List of Authors:       | Zhang, Yuzhuo; Guangzhou University of Chinese Medicine<br>Yang, Guang; Guangzhou University of Chinese Medicine<br>Wei, Jinyi; Guangzhou University of Chinese Medicine<br>Chen, Fangliang; Guangzhou University of Chinese Medicine<br>Zhang, Min-Zhou; Guangzhou University of Chinese Medicine<br>Mao, Shuai; Guangzhou University of Chinese Medicine; Guangdong Provincial Hospital of Chinese Medicine, Department of Critical Care Medicine |
| <b>Primary Subject Heading</b>: | Intensive care                                                                                                                                                                                                                                                                                                                                                                                                                                      |
| Secondary Subject Heading:      | Complementary medicine                                                                                                                                                                                                                                                                                                                                                                                                                              |
| Keywords:                       | Adult intensive & critical care < ANAESTHETICS, Adult anaesthesia < ANAESTHETICS, Pain management < ANAESTHETICS                                                                                                                                                                                                                                                                                                                                    |
|                                 |                                                                                                                                                                                                                                                                                                                                                                                                                                                     |

SCHOLARONE™  
Manuscripts

1  
2  
3  
4  
5 1 **Prospective comparison of acupuncture with sham acupuncture to**  
6  
7 2 **determine impact on sedation and analgesia in mechanically ventilated**  
8  
9 3 **critically ill patients (PASSION study): Protocol for a randomized**  
10  
11 4 **controlled trial**  
12  
13  
14

15 5 Yuzhuo Zhang, Ph.D. <sup>1\*</sup>

16 6 Guang Yang, M.D. <sup>1,2\*</sup>

17 7 Jinyi Wei, M.D. <sup>1</sup>

18 8 Fangliang Chen, M.D. <sup>1</sup>

19 9 Minzhou Zhang, M.D. <sup>1,2,3Δ</sup>

20 10 Shuai Mao, M.D. <sup>1,2,3Δ</sup>

21  
22  
23 11 *<sup>1</sup> Second Clinical College, Guangzhou University of Chinese Medicine, Guangzhou*  
24 12 *510405, China*

25 13 *<sup>2</sup> Department of Critical Care Medicine, Guangdong Provincial Hospital of Chinese*  
26 14 *Medicine, Guangzhou 510120, China*

27 15 *<sup>3</sup> Guangdong Provincial Branch of National Clinical Research Centre for Chinese*  
28 16 *Medicine Cardiology, Guangzhou 510120, China*

29 17  
30 18 \*The first two authors contribute equally to this article.

31 19 ΔCorrespondence to:

32 20 Prof. Shuai MAO

33 21 Department of Critical Care Medicine,

34 22 Guangdong Provincial Hospital of Chinese Medicine,

35 23 Guangzhou 510120, China

36 24 Phone: 86-20-81887233

37 25 Fax: 86-20-81867705

38 26 E-mail: [maoshuai@gzucm.edu.cn](mailto:maoshuai@gzucm.edu.cn)

39 27 Or Prof. Minzhou Zhang [minzhouzhang@gzucm.edu.cn](mailto:minzhouzhang@gzucm.edu.cn)

## ABSTRACT

**Introduction** Sedation and analgesia are recommended to be employed in the intensive care unit (ICU) to enhance patient comfort and safety, facilitate mechanical ventilation, and reduce oxygen demands. However, the increasing evidence demonstrates that excessive sedation and analgesia might prolong mechanical ventilation and increase costs and mortality. Acupuncture is known to be able to attenuate pain, anxiety, and agitation symptoms while avoiding excessive sedation and analgesia caused by drugs. Therefore, we present a protocol to investigate whether acupuncture, used for sedation and analgesia, can reduce the duration of mechanical ventilation, save medical resources, and reduce the mortality of critically ill patients receiving mechanical ventilation.

**Methods and analysis** Prospective, randomized controlled trial (RCT) is conducted on 180 adult medical/surgical ICU patients with mechanical ventilation needing sedation at 3 ICUs between 03 November 2021 and 16 August 2023. Patients will be treated with analgesia and sedation to achieve desired target sedation levels (Richmond Agitation Sedation Score of -2 to 1). Enrolled patients will be randomly assigned in a ratio of 1:1:1 to receive deep needle insertion with combined manual and alternating-mode electrical stimulation on acupoints (AC group), superficial needle insertion without manual stimulation and electrical stimulation on non-acupoints (SAC group), or no acupuncture intervention (NAC group).

The primary outcome is the duration of mechanical ventilation from randomization until patients are free of mechanical ventilation (including noninvasive) without reinstitution for the following 48 hours. Secondary endpoints include the dose of administered sedatives and analgesic at comparable sedation levels throughout the study, ICU length of stay, hospital length of stay. Additional outcomes include the prevalence and days of delirium in ICU, mortality in ICU and within 28 days after randomization, and the number of ventilator free days in 28 days.

1  
2  
3  
4  
5  
6  
7  
8  
9  
10  
11  
12  
13  
14  
15  
16  
17  
18  
19  
20  
21  
22  
23  
24  
25  
26  
27  
28  
29  
30  
31  
32  
33  
34  
35  
36  
37  
38  
39  
40  
41  
42  
43  
44  
45  
46  
47  
48  
49  
50  
51  
52  
53  
54  
55  
56  
57  
58  
59  
60

**Ethics and dissemination** This trial was approved by the ethics committee at Guangdong Provincial Hospital of Chinese Medicine. We will publish the study results.

**Trial Registration numbers: ChiCTR2100052650**

**Keywords:**

acupuncture; sedation; analgesia; critically ill patients; nonpharmacological therapy

**Word Count: 3815**

For peer review only

## Strengths and limitations of this study

- This study is an RCT to investigate both the sedative and analgesic effects of acupuncture on critically ill patients needing mechanical ventilation in ICU.
- This study provides a sedative and analgesic strategy for mechanically ventilated critically ill patients with less side effects.
- The primary endpoint is the duration of mechanical ventilation from randomization until patients are free of mechanical ventilation (including noninvasive) without reinstitution for the following 48 hours.
- Secondary endpoints include the dose of administered sedatives and analgesics at comparable sedation levels throughout the study, ICU length of stay, and hospital length of stay.
- Limitations are the non-blinded interventions due to the nature of acupuncture.

## INTRODUCTION

Sedative and analgesic medications are routinely administered to mechanically ventilated critically ill patients to reduce pain, anxiety, and agitation, as well as to allow patients to tolerate invasive procedures in the intensive care unit (ICU).<sup>1</sup> Opiates are most commonly used analgesics, while benzodiazepines, propofol, or dexmedetomidine are typically used to prevent or reduce anxiety and agitation.<sup>2</sup> However, overuse of these medications is associated with worsened clinical outcomes, such as prolonged mechanical ventilation and hospital length of stay, increased risk of altered mental status, and even higher mortality.<sup>3</sup> Thus, reducing the unnecessary dosage of sedative and analgesic medications, as well as their side effects while providing desired sedation has always been a key objective when caring for critically ill patients.

As a therapeutic modality with fewer adverse effects, acupuncture has been used in China and other Asian countries for thousands of years to treat various conditions.<sup>4-6</sup> Studies of acupuncture usually focuses on its analgesic effect, such as relieving pain and partly reducing opioid-related side effects during or after surgical procedures.<sup>7-11</sup> Particularly, the Centers for Medicare & Medicaid Services (CMS) of the USA finalizes a decision to cover acupuncture for chronic low back pain for Medicare beneficiaries in January 2020. Moreover, some studies have investigated the use of acupuncture on reducing sedative and analgesic drug demands, and the duration of mechanical ventilation, while improving patients' experience during mechanical ventilation.<sup>12-15</sup> However, there are still a few discrepant research findings on the sedative and analgesic effects of acupuncture.<sup>16 17</sup> And studies investigating both the sedative and analgesic effects of acupuncture among all critically ill patients needing mechanical ventilation in ICU are limited.

Therefore, the PASSION study is designed to be an RCT which investigate the efficacy of acupuncture on sedation and analgesia in mechanically ventilated critically ill patients. We are going to test the hypothesis that acupuncture, as adjunctive therapy to



1  
2  
3  
4 100 sedation and analgesia therapies, could reduce the duration of mechanical ventilation,  
5  
6 101 the dose of administered sedatives and analgesics, and subsequently improve other  
7  
8 102 clinical outcomes for critically ill patients when compared with sham acupuncture or  
9  
10 103 non-acupuncture.

## 11 12 13 104 **METHODS**

### 14 15 105 **Study Design Overview**

16  
17  
18 106 This is a prospective, parallel-group, controlled trial will recruit 180 patients with a  
19  
20 107 computer-generated allocation sequence and centralized randomization at tertiary and  
21  
22 108 regional ICUs in 3 hospitals (Guangdong Provincial Hospital of Chinese Medicine,  
23  
24 109 Charity Hospital of Guangzhou, University Hospital) in South China. Recruitment  
25  
26 110 officially began on 03 November 2021, and the final follow-up of the last subject will  
27  
28 111 not exceed 16 August 2023. Eligible patients will be randomly assigned, in a ratio of  
29  
30 112 1:1:1, to receive deep needle insertion with combined manual and alternating-mode  
31  
32 113 electrical stimulation on acupoints (AC group, n =60), superficial needle insertion  
33  
34 114 without manual or electrical stimulation on non-acupoints (SAC group, n =60) for 30  
35  
36 115 min/day, or no acupuncture intervention (NAC group, n =60), respectively.

37  
38  
39 116 Participants will be assessed for the duration of mechanical ventilation, as well as the  
40  
41 117 dose of administered sedatives and analgesics at comparable sedation levels, from  
42  
43 118 randomization until patients are free of mechanical ventilation (including noninvasive)  
44  
45 119 without reinstitution for the following 48 hours. They will be also assessed for whether  
46  
47 120 acupuncture can achieve better clinical outcomes than SAC and NAC treatment. The  
48  
49 121 design of the trial is summarized in Figure 1.

### 50 51 52 122 **Ethical Requirements and Registration**

53  
54  
55 123 This protocol is approved by the Institutional Human Clinical Research Ethical  
56  
57 124 Committee at Guangdong Provincial Hospital of Chinese Medicine (Guangzhou, China)  
58  
59 125 in October 2021 with permission number ZF2021-144-01. The PASSION study was  
60

registered on Nov 3, 2021 (ClinicalTrials.gov, number ChiCTR2100052650) and will be conducted following the Declaration of Helsinki from 03 November 2021 to 16 August 2023.

Written informed consent will be provided before enrollment voluntarily. Considering that patients will be sedated following ICU admission, complete adherence to patient consent is deemed impossible. Patients or their authorized surrogates will be informed by the researchers of the investigational nature and details of the study, together with the possible risks and all the benefits. Written informed consent will be subsequently obtained from either of them. Patients from whom surrogate consent is obtained are asked again to provide informed consent once determined to be competent. They can also withdraw from the study at any time they wish. Also, the investigator can decide to withdraw a subject from the study for urgent medical reasons. The researcher should complete the case report form (CRF) and record the reason for dropping out.

## Patients

Patients from medical and surgical ICU, aging from 18 to 80 years, for expected mechanical ventilation longer than 24 hours, with agitation and/or discomfort after recovering from drugs used to facilitate endotracheal intubation, requiring sedation and agitation by continuous intravenous administration deemed by the ICU physician, are eligible for participation as soon as they or their authorized surrogates are willing to give informed consent (Table 1).

**Table 1. Inclusion and exclusion criteria**

| A. Inclusion criteria                                                           | B. Exclusion criteria                                                  |
|---------------------------------------------------------------------------------|------------------------------------------------------------------------|
| 1. Aged 18 years or over and under 80 years;                                    | 1. Skin lesions near the acupuncture points;                           |
| 2. Required mechanical ventilation >24 hours;                                   | 2. Coagulopathy (bleeding time >4 min, thrombocytes <50,000/ $\mu$ l); |
| 3. Continuous intravenous administration of sedative and analgesic medications; | 3. Hypohepatia with Childs-Pugh class B or C;                          |

|                                                                                  |                                                                                      |
|----------------------------------------------------------------------------------|--------------------------------------------------------------------------------------|
| 4. Willingness to provide informed consent prior to enrollment;                  | 4. Second- or third-degree atrioventricular block;                                   |
| 5. Be able to comply with all follow-up evaluations (in investigator's opinion). | 5. Severe dementia;                                                                  |
|                                                                                  | 6. Psychiatric disorder;                                                             |
|                                                                                  | 7. Neurological disease;                                                             |
|                                                                                  | 8. Active seizures;                                                                  |
|                                                                                  | 9. Alcohol or drug abuse;                                                            |
|                                                                                  | 10. Benzodiazepine dependency;                                                       |
|                                                                                  | 11. Moribund state with the planned withdrawal of life support;                      |
|                                                                                  | 12. Family or physician refusal;                                                     |
|                                                                                  | 13. Pregnancy or lactation;                                                          |
|                                                                                  | 14. Currently participated in any other investigational therapeutic or device trial. |

Exclusion criteria include skin lesions near the acupuncture points, coagulopathy (bleeding time >4 min, thrombocytes <50,000/ $\mu$ l), neurological disease (previous stroke, cerebral palsy, etc.) that would confound the diagnosis of delirium, active seizures, severe dementia, relevant psychiatric disorder, hypohepatia with Childs-Pugh class B or C, second- or third-degree atrioventricular block, alcohol or drug abuse, benzodiazepine dependency, a moribund state with the planned withdrawal of life support, family or physician refusal, pregnancy or lactation, currently participating in any other investigational therapeutic or device trial (Table 1).

### ICU standard treatment

As a standard in each ICU of our study, mechanically ventilated critically ill patients will be treated in a single treatment room. They will be taken care of by a trained ICU physician responsible for all treatment decisions, including sedation analgesia management plans made in consultation with the bedside nurses. They will also receive one-to-one nursing care to adjust the treatment based on the patient's response in time. A team of medical officers will review patient care every day.

### Randomization and blinding

1  
2  
3  
4 163 Eligible patients will be stratified by participating sites to avoid patient-level  
5  
6 164 contamination from the systems-level organizational change in sedation practice and,  
7  
8 165 within each ICU, assigned to the AC, SAC, or NAC group in an equal ratio via  
9  
10 166 computer-generated randomization. In detail, an independent study coordinator will log  
11  
12 167 into the central randomization system using a password-protected account and enter  
13  
14 168 inclusion and exclusion criteria to ensure eligibility. After entering a patient's name and  
15  
16 169 identification card number, a randomization sequence will be generated in blocks of  
17  
18 170 varying sizes and stratified by the site under the control of the central computer system.  
19  
20 171 The random sequence will then be concealed in sealed envelopes and sent to an  
21  
22 172 acupuncturist from the assigned patient's site by the study coordinator.

23  
24  
25 173 Allocation of participants will be known to the study coordinator and acupuncturists  
26  
27 174 who will not be involved in outcome assessment and be required to sign a confidentiality  
28  
29 175 agreement about patient allocation. All patients will be treated in a single treatment  
30  
31 176 room. In both AC and SAC groups, patients, bedside nurses, and physicians will be  
32  
33 177 blinded to which acupuncture method the patients will receive. The data collectors and  
34  
35 178 the biostatisticians will be masked from the treatment assignment.

### 36 37 38 179 **Acupuncture interventions and procedures**

39  
40 180 The acupuncture interventions will be developed by a consensus of acupuncture experts  
41  
42 181 according to the Standards for Reporting of Controlled Trials in Acupuncture  
43  
44 182 (STRICTA).<sup>18</sup> Patients will be assigned in a ratio of 1:1:1 to AC group (n=60), SAC  
45  
46 183 group (n=60), and NAC group (n=60). Besides, each group shares the same basic  
47  
48 184 Sedation Analgesia Strategy.

49  
50  
51 185 For patients in the AC group, 8 disposable sterile acupuncture needles (filiform needles  
52  
53 186 made of stainless steel, Beijing Hanyi Medical Instruments, China) with a length of 40  
54  
55 187 mm and a diameter of 0.30 mm will be inserted into acupuncture points at Baihui  
56  
57 188 (DU20), Yintang (EX-HN3), and bilateral acupoints of Shenmen (HT7), Hegu (LI4),  
58  
59 189 Taichong (LR3) according to the theory of traditional Chinese medicine. The  
60

1  
2  
3  
4 190 localization of these points is measured with a unit of *cun*, a traditional Chinese unit of  
5  
6 191 length. One *cun* of a person is defined as the width of the thumb himself, whereas four  
7  
8 192 fingers are defined as 3 *cun*. The insertion will be followed by manual stimulation, a  
9  
10 193 lifting and thrusting technique combined with twirling and rotating the needle sheath to  
11  
12 194 produce a sensation of soreness, numbness, distention, or radiating. This sensation is  
13  
14 195 known as “*Deqi*” and is considered to be indicative of effective needling. Then,  
15  
16 196 alternating-mode electrical stimulation will be given with the parameters: bursts  
17  
18 197 alternating at 2 Hz and 100 Hz every 3 s, with 10-15 mA intensity inducing no  
19  
20 198 discomfort and no muscle contraction.

21  
22  
23 199 For patients in the SAC group, superficial needle insertion with a depth of 2 mm and no  
24  
25 200 manual stimulation will be performed for 30 min/day. The same sort of needles with the  
26  
27 201 AC group will be placed 1 cm distant lateral the used acupoints that are not known as  
28  
29 202 AC points. The electrical stimulator will likewise be connected but without electrical  
30  
31 203 stimulation. (Figure 2)

32  
33  
34 204 Patients in the NAC group will receive no acupuncture-related intervention during the  
35  
36 205 trial. But they can receive a free 12-session daily acupuncture treatment after completing  
37  
38 206 the study at their convenience.

39  
40 207 Each site will be required to have 2 licensed acupuncturists with more than 3 years of  
41  
42 208 experience and specialized training in the acupuncture protocols before starting the  
43  
44 209 study. The acupuncturists will be responsible for the whole acupuncture process but are  
45  
46 210 not further involved in this study.

### 49 211 **Basic Sedation Analgesia Strategy**

50  
51  
52 212 In this study, diagnosis and therapeutic management of agitation and pain will be  
53  
54 213 prescribed by the physicians responsible for the clinical care of each patient according  
55  
56 214 to recommended guidelines<sup>19</sup>. An interruptive sedation strategy will be adopted by  
57  
58 215 bedside nurses, and sedation levels and pain intensity will be assessed with the  
59  
60 216 Richmond Agitation Sedation Scale (RASS)<sup>20 21</sup>, the Behavioral Pain Scale (BPS), or

1  
2  
3  
4 217 the Numeric Rating Scale (NRS) <sup>22 23</sup> every 4 h in order to adapt sedatives and analgesics  
5  
6 218 to avoid overuse. Authorized nurses will titrate infusions, including benzodiazepines,  
7  
8 219 propofol, and dexmedetomidine for sedatives and opiates for analgesia, instead of bolus  
9  
10 220 dosing to minimize potential adverse effects.

11  
12  
13 221 The sedation analgesia strategy is designed to consider pain treatment before increasing  
14  
15 222 sedatives to minimize the risk of oversedation. The pain will be assessed either by the  
16  
17 223 BPS in patients unable to communicate or by the NRS, a 1-10 numeric rating scale, in  
18  
19 224 those sufficiently oriented and awake to communicate with the medical staff. Efficacy  
20  
21 225 of the study analgesics drug will be defined as the ability to achieve a score < 3 in both  
22  
23 226 of the pain scoring systems above, evaluated by the bedside nurse. Efficacy of the  
24  
25 227 sedative drug will be defined as the ability to achieve a sedation score between -2 and  
26  
27 228 1, set by the patient's medical team using the RASS (a highly reliable and well-validated  
28  
29 229 sedation scale for use within patients) over time in the ICU.

30  
31  
32 230 Each morning, a daily interruption of sedation (DIS) will be performed at the clinical  
33  
34 231 medical team's discretion. Major opioid infusions needed for active pain will be  
35  
36 232 continued. Recommended criteria to interrupt sedation are used: no drug-induced  
37  
38 233 paralysis, no intracranial hypertension, no myocardial ischemia in the previous 24 h,  
39  
40 234 primary disease healing in progress, hemodynamic stability, the partial pressure of  
41  
42 235 arterial oxygen  $\geq 60$  mmHg, the fraction of inspired oxygen  $\leq 50\%$ , and positive end-  
43  
44 236 expiratory pressure  $\leq 8$  cmH<sub>2</sub>O. The interruption of continuous sedation will be coupled  
45  
46 237 with an assessment hourly for wakefulness, defined as the RASS score 1 to 4, and the  
47  
48 238 ability to perform at least 3 of the following requests: eye-opening, tracking, hand  
49  
50 239 squeezing, and toe moving. With the criteria recommended, patients will be able to pass  
51  
52 240 the DIS if they can tolerate it for 4 h and keep awakening enough. Then, a spontaneous  
53  
54 241 breathing trial (SBT) will immediately be managed. <sup>24</sup> If patients are insufficient for the  
55  
56 242 DIS, sedatives will be restarted at half the previous dose and then titrated to achieve  
57  
58 243 patient comfort. DIS will be performed the next morning again.



## Extubation Test

Before extubation, patients will be managed with an SBT. During the SBT, without ventilatory support, patients will be allowed to breathe through a ventilatory circuit with 8cm H<sub>2</sub>O PSV, 0 PEEP, and unchanged FiO<sub>2</sub> from the mechanical ventilation period leading up to the SBT.<sup>25</sup> The criteria for a successful SBT are respiratory rate between 8 and 35 breaths/min, arterial oxygen saturation > 88%, less than 20% change in mean arterial pressure or heart rate, no signs of respiratory distress and acute cardiac arrhythmia, no use of accessory muscles, no abdominal paradox, absence of sweating, agitation or impaired vigilance status. Patients will pass the SBT if they complete a 60 min trial meeting the criteria, and extubation will be implemented 6 h later. Patients who fail the SBT will be ventilated immediately with the ventilator settings used before the trial, and sedatives will be restarted at half the previous dose and then titrated to achieve patient comfort. The SBT will be managed the next morning again. Extubation will be implemented following standardized criteria, but the decision to extubate remains upon the authority of the attending physician in charge of the patient. Researchers will not participate in decisions to extubate patients.

The clinical research team will make sure that the overall research protocol, especially the criteria for sedation and definition of successful SBT, is strictly followed by the bedside nurse and medical teams in charge of the patients. Related information will be reported on the clinical research form.

## Assessing Delirium

Delirium will be measured by the bedside nurses according to the Confusion Assessment Method for the ICU (CAM-ICU) until out of ICU or hospital discharge.<sup>26</sup> Patients will be considered in this state if they have a RASS score  $\geq -3$  and a positive CAM-ICU, defined as positive with the symptoms of feature 1, feature 2, and either feature 3 or feature 4 as follows:

Feature 1: acute onset of mental status change or fluctuation of mental status

1  
2  
3  
4 271 Feature 2: inattention

5  
6 272 Feature 3: disorganized thinking

7  
8  
9 273 Feature 4: altered level of consciousness

## 10 11 12 274 **Adverse Event Monitoring**

13  
14  
15 275 Adverse events will also be defined a priori and prospectively monitored. Adverse  
16  
17 276 events associated with acupuncture include bleeding, hematoma, and local infection.

18  
19 277 Adverse events related to sedation and analgesia include inadequate pain and sedation

20  
21 278 management (either pain score  $> 4$  and RASS  $> 1$  for 2 consecutive hours or pain and

22  
23  
24 279 agitation assumed present if receiving neuromuscular blockade), clinically significant

25  
26 280 iatrogenic withdrawal. Adverse events associated with mechanical ventilation include

27  
28 281 accidental removal of medical devices, extubation failure (reintubation within 24 hours),

29  
30 282 pressure ulcers, catheter-associated bloodstream infections, ventilator-associated

31  
32 283 pneumonia. Every day, research personnel will monitor and assess the seriousness of all

33  
34 284 adverse events and document all details to determine whether the events are related to

35  
36 285 acupuncture interventions or the study procedure, as well as developing further

37  
38 286 treatment strategies including whether it is necessary to uncover blindness. A report of

39  
40 287 all serious, unexpected, and study-related adverse events will be presented to an

41  
42 288 independent data and safety monitoring board and the institutional review board within

43  
44 289 7 days of occurrence.

## 45 46 47 290 **Outcomes and Data Collection**

48  
49 291 The primary outcome is the duration of mechanical ventilation, defined as the time from  
50  
51 292 randomization to successful extubation without reinstitution for the following 48 hours.

52  
53 293 The secondary outcomes will include the dose of administered sedatives and opiate

54  
55 294 (absolute value as well as indexed value [total drug in mg/kg  $\div$  total number of hours

56  
57 295 from the start of infusion to its ultimate discontinuation]) at comparable clinically

58  
59 296 individualized target sedation goals throughout the study, the duration of ICU length of



1  
2  
3  
4 297 stay, and hospital length of stay. Additional outcomes include the prevalence and days  
5  
6 298 of delirium in ICU, mortality in ICU and within 28 days after randomization, and the  
7  
8 299 number of ventilator-free days in 28 days.

9  
10  
11 300 The day of extubation is considered as the day of death for patients who died while still  
12  
13 301 intubated. Censoring for ICU or hospital length analyses occurred at the time of death  
14  
15 302 or study withdrawal. The number of ventilator-free days in 28 days is defined as days  
16  
17 303 alive and not using mechanical ventilation between days 1 and 28. For the 28-day  
18  
19 304 mortality analyses, patients are censored at the time of the last contact alive or at 28  
20  
21 305 days from enrollment, whichever is first.

22  
23 306 Baseline demographic data will be collected from patients' records by the medical team,  
24  
25 307 including the reason for ICU admission, Acute Physiology and Chronic Health  
26  
27 308 Evaluation (APACHE) II scores and diagnostic classification, Sequential Organ Failure  
28  
29 309 Assessment (SOFA) scores, hematological and blood chemistry data, and clinical data  
30  
31 310 (detailed information of sedative and analgesic medications administered to the patients  
32  
33 311 before randomization, cardiac safety profile including electrocardiograms and serum  
34  
35 312 troponins, and liver function profile including serum bilirubin and glutamate pyruvate  
36  
37 313 transaminase, etc.). Vital signs such as blood pressure, heart rate, heart rhythm,  
38  
39 314 temperature, and oxygen saturations will be recorded and collected by the bedside  
40  
41 315 nurses, as well as scores of RASS, BPS, NRS, and CAM-ICU. Moreover, adverse events  
42  
43 316 data will also be collected from patients' records. All of data mentioned above will be  
44  
45 317 entered using the double entry method.

#### 47 48 49 318 **Patient and public involvement statement**

50  
51 319 There is no patient or public involvement in the design, conduct, reporting or  
52  
53 320 dissemination plans of this research.

#### 54 55 56 321 **Statistical Analysis**

1  
2  
3  
4 322 Statistical power is estimated using the reduction in duration of mechanical ventilation  
5  
6 323 as the primary outcome. According to Carrasco and colleagues, the mean ( $\pm$ standard  
7  
8 324 deviation) time for current sedation is  $54.7 \pm 12.3$  hours.<sup>27</sup> We calculate that a sample  
9  
10325 size of 48 patients in each group will provide a power of 90% to detect a 15% relative  
11  
12326 reduction in intubation time at a two-sided significance level of 0.05. With a dropout  
13  
14327 rate of 20%, the estimated sample size will be 60 patients per group. Thus, a total of 180  
15  
16328 patients will be enrolled in the study.

17  
18  
19329 The per-protocol set (PPS), including patients who complete the study without having  
20  
21330 major protocol violations, is used for the evaluation of clinical outcomes. While the full  
22  
23331 analysis set (FAS), determined according to the intention-to-treat population (ITT) who  
24  
25332 undergo randomization except for those who are excluded after randomization, is not  
26  
27333 only used for evaluation of clinical outcomes but also baseline characteristics to measure  
28  
29334 the balance of the three groups before intervention. Missing data will be replaced by  
30  
31335 Markov Chain Monte Carlo (MCMC) method with 5-10 iterations according to the  
32  
33336 principle of multiple imputation. Continuous data will be presented as median and  
34  
35337 interquartile range, while categorical data as numbers and proportion. Normal  
36  
37338 distribution will be checked by the Kolmogorov test. For continuous variables, normal  
38  
39339 distributed data will be compared using one-way analysis of variance among three  
40  
41340 groups, and independent Student's t-test between any of the two groups. While the  
42  
43341 comparison of non-normally distributed parameters among three groups will be applied  
44  
45342 by ANOVA (Kruska Wallis), and then the Mann-Whitney U-test between any of the  
46  
47343 two groups. Categorical data will be compared by using Fisher's exact test or the chi-  
48  
49344 square test. Other factors that may affect the efficacy will be considered as co-variants  
50  
51345 for covariance analysis or Cox proportional hazards regression model.  $P \leq 0.05$  will be  
52  
53346 considered to indicate statistical significance. All analyses will be done with R statistical  
54  
55347 software, version 4.0.2.

## 58348 **DISCUSSION**

59  
60

1  
2  
3  
4 349 This prospective trial is designed to provide evidence on the beneficial effect of  
5  
6 350 acupuncture on reducing the duration of mechanical ventilation, avoiding excessive  
7  
8 351 sedation and analgesia, as well as improving clinical outcomes in sedating mechanically  
9  
10352 ventilated ICU patients.

11  
12  
13353 General analgesia and sedation are necessary for mechanically ventilated critically ill  
14  
15354 patients. However, overuse of sedative and analgesic medications may cause varying  
16  
17355 degrees of side effects, like respiratory drive reduction.<sup>28</sup> These side effects are  
18  
19356 associated with worsened clinical outcomes, such as prolonged mechanical ventilation  
20  
21357 and hospital length of stay, increased risk of delirium, and even higher mortality.<sup>29-30</sup>  
22  
23358 With many sophisticated attempts to mitigate this clinical problem, it has thus far been  
24  
25359 identified that optimizing analgesia and sedation strategy is able to prevent excessive  
26  
27360 sedation and analgesia and improve the clinical outcome by reducing the duration and  
28  
29361 dosage of sedative and analgesic medications.<sup>31-33</sup> Thus, it become a key objective to  
30  
31362 formulate an intensive sedative and analgesic medications strategy when caring for  
32  
33363 critically ill patients.

34  
35  
36364 The rationale for evaluating the ability of acupuncture on this subject is based on  
37  
38365 research findings that acupuncture can manage pain relief and facilitate opioid tapering  
39  
40366 by increasing the  $\mu$ -opioid receptor binding ability and the release of the opioid  
41  
42367 peptide.<sup>34-35</sup> According to the meta-analysis of acupuncture on pain relief, visual analog  
43  
44368 scale (VAS) pain scores in the AC group is lower than that in the NAC group [MD=-  
45  
46369 11.13, 95%CI(-13.59,-8.68), Z=8.9, P < 0.00001], Figure 3A.<sup>36-50</sup> However, there is a  
47  
48  
49370 substantial heterogeneity of results in these trials ( $I^2 = 70\%$ ). As shown in Figure 3B,  
50  
51371 heterogeneity decreases ( $I^2 = 14\%$ ) when the studies by Xian Wang and Zheng Lihong  
52  
53372 are excluded, and the AC group consistently shows a greater pain relief compared to  
54  
55373 NAC group [MD=-10.92, 95%CI(-12.93,-8.91), Z=10.66, P < 0.00001]. Meanwhile,  
56  
57374 acupuncture, without adverse effects, has been shown to exert sedation effects in various  
58  
59375 medical conditions. As it shown in the meta-analysis, with a high heterogeneity( $I^2 =$   
60

1  
2  
3  
4 376 95%), the bispectral index (BIS) value in the AC group is also lower than that in the  
5  
6 377 NAC group [MD=-5.82,95%CI (-9.36, -2.27), Z=3.22, P=0.001], Figure 4A.<sup>51-56</sup> As  
7  
8 378 shown in Figure 4B, heterogeneity decreases ( $I^2 = 0\%$ ) when the studies by J.  
9  
10379 Fleckenstein and Jiheng Chen are excluded, and the AC group consistently shows a  
11  
12380 better sedative effect compared to NAC group [MD=-3.18,95%CI(-5.53,-0.84),Z=2.66,  
13  
14381 P < 0.008]. In addition, previous studies have shown that Yintang (EX-HN3) and  
15  
16  
17382 Shenmen (HT7) have good sedative effects, Hegu (LI4) and Taichong (LR3) have  
18  
19383 analgesic advantages, while Baihui (DU20) appears both sedative and analgesic  
20  
21384 effects.<sup>54 57-60</sup> With these promising results, it is meaningful to assess acupuncture as a  
22  
23385 potential analgesia and sedation strategy in ameliorating the clinical outcomes in  
24  
25386 mechanically ventilated critically ill patients.

26  
27  
28387 RCT has been recognized as the gold standard for clinical trials since the late 20th  
29  
30388 century.<sup>61</sup> Another important designed technique to improve the quality of clinical trials  
31  
32389 is blinding. Over the past several decades, RCT and blinding have been used to avoid  
33  
34390 bias (selection bias, performance bias, and ascertainment bias) in clinical trials and  
35  
36391 improve the reliability of effects assessment. Sham acupuncture, aiming to blind the  
37  
38392 participants and control therapeutic components, is designed as a placebo control.  
39  
40393 However, this acupuncture technique is relatively difficult to fabricate because it should  
41  
42394 be both biologically inert and psychologically indistinguishable.<sup>62</sup> Even previous  
43  
44395 experience of acupuncture feeling might impact the present perception of verum and  
45  
46396 sham acupuncture intervention.

47  
48  
49397 In PASSION study, we utilize a rigorous set of methods to minimize bias, such as  
50  
51398 computer-generated central randomization, parallel control design, and statistical  
52  
53399 analysis according to the intent-to-treat principle. In control design, the superficial  
54  
55400 needle insertion without manual or electrical stimulation at the non-point is applied to  
56  
57401 simulate deep skin penetration in the SAC group, which is used as the most predominant  
58  
59402 type of sham electropuncture method to ensure blinding according to the published  
60

1  
2  
3  
4 403 literature.<sup>63</sup> However, a few studies reported that superficial needle insertion at non-  
5  
6 404 acupoints might not be physiologically inert since the locations of points are nearby true  
7  
8 405 acupoints.<sup>64 65</sup> Moreover, researchers found that even mechanical non-penetration can  
9  
10406 evoke slight acupressure effects and physiological activity.<sup>66</sup> Both of these factors will  
11  
12407 affect the effect assessment of acupuncture. Thus, the NA group, avoiding all  
13  
14408 therapeutic components, is designed to clarify whether the sham acupuncture can be  
15  
16409 regarded as physiologically inert, as well as compared with the results of the AC group.

17  
18  
19410 A potential limitation of this trial is blinding. Given the nature of acupuncture, the  
20  
21411 patients and members of the medical team in the NA group are impossible to be blinded  
22  
23412 throughout the entire duration of this trial. However, adequate measures will be taken  
24  
25413 to put the patients and medical team members of the other two groups in a masked state.  
26  
27414 For example, we will formulate a set of isolation and secrecy strategies for the study  
28  
29415 coordinator and acupuncturists to achieve satisfactory blinding levels in treatment  
30  
31416 administration. Thus, in both AC and SAC groups, patients and their medical team  
32  
33417 members will be blinded to the patients' acupuncture method. The data collectors and  
34  
35418 the biostatisticians will also be masked from the treatment assignment.

36  
37  
38419 The PASSION study is designed to demonstrate the efficacy of acupuncture on sedation  
39  
40420 and analgesia in mechanically ventilated critically ill patients. We expect the finding  
41  
42421 can provide evidence-based recommendations for acupuncture use for sedation and  
43  
44422 analgesia in critically ill patients with mechanical ventilation.

#### 45 46 47423 48 49424 **FUNDING STATEMENT:**

50  
51425 This study was funded by National Science Foundation (grant No.  
52  
53426 81703877&82074216&82004135), Science and Technology Planning Project of  
54  
55  
56427 Guangzhou (202102010301).

## DISCLAIMER

The sponsors have had no role in the project development, in the collection of data, in the preparation of this manuscript, nor the decision to publish. The researchers have complete independence from the sources of funding in all aspects of this study.

## PATIENT CONSENT FOR PUBLICATION

Consent obtained from parent(s)/guardian(s).

## PROVENANCE AND PEER REVIEW

Not commissioned; externally peer reviewed.

## ETHICS AND DISSEMINATION

The study was reviewed and approved by Ethics Committee of Guangdong Province Hospital of Chinese Medicine at Guangzhou University of Chinese Medicine (ZF2021-144-01) and performed in accordance with Guide for the Care and Use of Laboratory Animals published by the US National Institutes of Health (publication No. 85-23, revised 1996).

## COMPETING INTERESTS STATEMENT

All authors declare that they have no conflict of interest.

## AUTHORS' CONTRIBUTIONS

YZ & SM drafted this manuscript; GY, JW & FC made statistical analysis; MZZ made a critical revision of the manuscript and contributed to the rationalization of the study.

All authors read and approved the final manuscript.

## REFERENCE



- 1  
2  
3 450 1. Coursin DB, Skrobik Y. What Is Safe Sedation in the ICU? *New England Journal of Medicine* 2019;380(26):2577-78.  
4 451 doi: 10.1056/NEJMe1906522
- 6 452 2. Subramaniam B, Shankar P, Shaefi S, et al. Effect of Intravenous Acetaminophen vs Placebo Combined With Propofol  
7 453 or Dexmedetomidine on Postoperative Delirium Among Older Patients Following Cardiac Surgery The  
8 DEXACET Randomized Clinical Trial. *Jama-Journal of the American Medical Association* 2019;321(7):686-96.  
9 454 doi: 10.1001/jama.2019.0234  
10 455
- 11 456 3. Shelton KT, Qu J, Bilotta F, et al. Minimizing ICU Neurological Dysfunction with Dexmedetomidine-induced Sleep  
12 (MINDDS): protocol for a randomised, double-blind, parallel-arm, placebo-controlled trial. *BMJ Open*  
13 457 2018;8(4):e020316. doi: 10.1136/bmjopen-2017-020316 [published Online First: 2018/04/22]  
14 458
- 15 459 4. Zhao L, Li D, Zheng H, et al. Acupuncture as Adjunctive Therapy for Chronic Stable Angina: A Randomized Clinical  
16 460 Trial. *Jama Internal Medicine* 2019;179(10):1388-97. doi: 10.1001/jamainternmed.2019.2407  
17 461
- 18 461 5. Garcia MK, Meng Z, Rosenthal DI, et al. Effect of True and Sham Acupuncture on Radiation-Induced Xerostomia  
19 Among Patients With Head and Neck Cancer: A Randomized Clinical Trial. *Jama Network Open*  
20 462 2019;2(12):e1916910. doi: 10.1001/jamanetworkopen.2019.16910  
21 463
- 22 464 6. Pei W, Peng R, Gu Y, et al. Research trends of acupuncture therapy on insomnia in two decades (from 1999 to 2018):a  
23 bibliometric analysis. *Bmc Complementary and Alternative Medicine* 2019;19(1):225. doi: 10.1186/s12906-019-  
24 465 2606-5  
25 466
- 26 467 7. He Y, Guo X, May BH, et al. Clinical Evidence for Association of Acupuncture and Acupressure With Improved Cancer  
27 Pain A Systematic Review and Meta-Analysis. *Jama Oncology* 2020;6(2):271-78. doi:  
28 468 10.1001/jamaoncol.2019.5233  
29 469
- 30 470 8. Smith CA, Armour M, Zhu X, et al. Acupuncture for dysmenorrhoea. *Cochrane Database of Systematic Reviews*  
31 2016(4):CD007854. doi: 10.1002/14651858.CD007854.pub3  
32 471
- 33 472 9. Manheimer E, Cheng K, Wieland LS, et al. Acupuncture for hip osteoarthritis. *Cochrane Database of Systematic Reviews*  
34 2018(5):CD013010. doi: 10.1002/14651858.Cd013010  
35 473
- 36 474 10. Dingemann J, Plewig B, Baumann I, et al. Acupuncture in posttonsillectomy pain A prospective, double-blinded,  
37 475 randomized, controlled trial. *Hno* 2017;65:73-79. doi: 10.1007/s00106-016-0290-z  
38
- 39 476 11. Wu M-S, Chen K-H, Chen IF, et al. The Efficacy of Acupuncture in Post-Operative Pain Management: A Systematic  
40 477 Review and Meta-Analysis. *Plos One* 2016;11(3):e0150367. doi: 10.1371/journal.pone.0150367  
41 478
- 42 479 12. Li Y, Li Y, Zhang WC, et al. Effects of acupuncture in Siguan points on man-machine counteraction in respiratory  
43 479 failure patients during mechanical ventilation. *Zhongguo Zhong Xi Yi Jie He Za Zhi* 2006;26(10):930-32.  
44 480
- 45 481 13. Tsay SL, Wang JC, Lin KC, et al. Effects of acupressure therapy for patients having prolonged mechanical ventilation  
46 481 support. *J Adv Nurs* 2005;52(2):142-50. doi: 10.1111/j.1365-2648.2005.03576.x [published Online First:  
47 482 2005/09/17]
- 48 483 14. AminiSaman J, Mohammadi S, Karimpour H, et al. Transcutaneous Electrical Nerve Stimulation at the Acupuncture  
49 484 Points to Relieve Pain of Patients Under Mechanical Ventilation: A Randomized Controlled Study. *J Acupunct*  
50 485 *Meridian Stud* 2018;11(5):290-95. doi: 10.1016/j.jams.2018.06.008 [published Online First: 2018/07/24]  
51 485
- 52 486 15. Yuan SC, Huang XI, Hua SY, et al. Effect of acupuncture on diaphragmatic function in patients with AECOPD type II  
53 487 respiratory failure evaluated by ultrasound detection. *Zhongguo Zhen Jiu* 2021;41(07):703-10. doi:  
54 487 10.13703/j.0255-2930.20200606-k0007  
55 488
- 56 489 16. Irnich D, Behrens N, Molzen H, et al. Randomised trial of acupuncture compared with conventional massage and  
57 "sham" laser acupuncture for treatment of chronic neck pain. *BMJ* 2001;322(7302):1574-8. doi:  
58 490 10.1136/bmj.322.7302.1574 [published Online First: 2001/06/30]  
59 491  
60

- 1  
2  
3 492 17. Kong JT, Puetz C, Tian L, et al. Effect of Electroacupuncture vs Sham Treatment on Change in Pain Severity Among  
4 493 Adults With Chronic Low Back Pain: A Randomized Clinical Trial. *JAMA Netw Open* 2020;3(10):e2022787. doi:  
5 494 10.1001/jamanetworkopen.2020.22787 [published Online First: 2020/10/28]  
6 495  
7 495 18. MacPherson H, Altman DG, Hammerschlag R, et al. Revised STAndards for Reporting Interventions in Clinical Trials  
8 of Acupuncture (STRICTA): extending the CONSORT statement. *Acupuncture in Medicine* 2010;28(2):83-93.  
9 496 doi: 10.1136/aim.2009.001370  
10 497  
11 498 19. Barr J, Fraser GL, Puntillo K, et al. Clinical Practice Guidelines for the Management of Pain, Agitation, and Delirium  
12 in Adult Patients in the Intensive Care Unit. *Critical Care Medicine* 2013;41(1):263-306. doi:  
13 499 10.1097/CCM.0b013e3182783b72  
14 500  
15 501 20. Ely EW, Truman B, Shintani A, et al. Monitoring sedation status over time in ICU patients - Reliability and validity of  
16 the Richmond Agitation-Sedation Scale (RASS). *Jama-Journal of the American Medical Association*  
17 502 2003;289(22):2983-91. doi: 10.1001/jama.289.22.2983  
18 503  
19 504 21. Sessler CN, Gosnell MS, Grap MJ, et al. The Richmond Agitation-Sedation Scale - Validity and reliability in adult  
20 intensive care unit patients. *American Journal of Respiratory and Critical Care Medicine* 2002;166(10):1338-44.  
21 505 doi: 10.1164/rccm.2107138  
22 506  
23 507 22. Payen JF, Bru O, Bosson JL, et al. Assessing pain in critically ill sedated patients by using a behavioral pain scale.  
24 *Critical Care Medicine* 2001;29(12):2258-63. doi: 10.1097/00003246-200112000-00004  
25 508  
26 509 23. Chanques G, Viel E, Constantin J-M, et al. The measurement of pain in intensive care unit: Comparison of 5 self-report  
27 intensity scales. *Pain* 2010;151(3):711-21. doi: 10.1016/j.pain.2010.08.039  
28 510  
29 511 24. Girard TD, Kress JP, Fuchs BD, et al. Efficacy and safety of a paired sedation and ventilator weaning protocol for  
30 mechanically ventilated patients in intensive care (Awakening and Breathing Controlled trial): a randomised  
31 controlled trial. *Lancet* 2008;371(9607):126-34. doi: 10.1016/s0140-6736(08)60105-1  
32 512  
33 514 25. Subira C, Hernandez G, Vazquez A, et al. Effect of Pressure Support vs T-Piece Ventilation Strategies During  
34 Spontaneous Breathing Trials on Successful Extubation Among Patients Receiving Mechanical Ventilation A  
35 Randomized Clinical Trial. *Jama-Journal of the American Medical Association* 2019;321(22):2175-82. doi:  
36 516 10.1001/jama.2019.7234  
37 517  
38 518 26. Hui D, Frisbee-Hume S, Wilson A, et al. Effect of Lorazepam With Haloperidol vs Haloperidol Alone on Agitated  
39 Delirium in Patients With Advanced Cancer Receiving Palliative Care A Randomized Clinical Trial. *Jama-*  
40 *Journal of the American Medical Association* 2017;318(11):1047-56. doi: 10.1001/jama.2017.11468  
41 520  
42 521 27. Carrasco G, Molina R, Costa J, et al. Propofol vs midazolam in short-, medium-, and long-term sedation of critically  
43 ill patients. A cost-benefit analysis. *Chest* 1993;103(2):557-64. doi: 10.1378/chest.103.2.557  
44 522  
45 523 28. Liu L, Wu A-P, Yang Y, et al. Effects of Propofol on Respiratory Drive and Patient-ventilator Synchrony during  
46 Pressure Support Ventilation in Postoperative Patients: A Prospective Study. *Chinese Medical Journal*  
47 524 2017;130(10):1155-60. doi: 10.4103/0366-6999.205864  
48 525  
49 526 29. Kollef MH, Levy NT, Ahrens TS, et al. The use of continuous IV sedation is associated with prolongation of mechanical  
50 ventilation. *Chest* 1998;114(2):541-48. doi: 10.1378/chest.114.2.541  
51 527  
52 528 30. Ouimet S, Kavanagh BP, Gottfried S, et al. Incidence, risk factors and consequences of ICU delirium. *Intensive Care*  
53 *Medicine* 2007;33(1):66-73. doi: 10.1007/s00134-006-0399-8  
54 529  
55 530 31. Chanques G, Conseil M, Roger C, et al. Immediate interruption of sedation compared with usual sedation care in  
56 critically ill postoperative patients (SOS-Ventilation): a randomised, parallel-group clinical trial. *Lancet*  
57 *Respiratory Medicine* 2017;5(10):795-805. doi: 10.1016/s2213-2600(17)30304-1  
58 532  
59 533 32. Mehta S, Burry L, Cook D, et al. Daily Sedation Interruption in Mechanically Ventilated Critically Ill Patients Cared  
60



- 1  
2  
3 534 for With a Sedation Protocol A Randomized Controlled Trial. *Jama-Journal of the American Medical Association*  
4 535 2012;308(19):1985-92. doi: 10.1001/jama.2012.13872
- 6 536 33. Asmussen S, Przkora R, Maybauer DM, et al. Meta-Analysis of Electroacupuncture in Cardiac Anesthesia and Intensive  
7 537 Care. *Journal of Intensive Care Medicine* 2019;34(8):652-61. doi: 10.1177/0885066617708558
- 9 538 34. Harris RE, Zubieta J-K, Scott DJ, et al. Traditional Chinese acupuncture and placebo (sham) acupuncture are  
10539 differentiated by their effects on mu-opioid receptors (MORs). *Neuroimage* 2009;47(3):1077-85. doi:  
11 540 10.1016/j.neuroimage.2009.05.083
- 13541 35. Han JS. Acupuncture: neuropeptide release produced by electrical stimulation of different frequencies. *Trends in*  
14542 *Neurosciences* 2003;26(1):17-22. doi: 10.1016/s0166-2236(02)00006-1
- 15 543 36. Wang B, Tang J, White PF, et al. Effect of the intensity of transcutaneous acupoint electrical stimulation on the  
16 544 postoperative analgesic requirement. *Anesth Analg* 1997;85(2):406-13. doi: 10.1097/00000539-199708000-  
18545 00029 [published Online First: 1997/08/01]
- 19 546 37. Usichenko TI, Dinse M, Hermsen M, et al. Auricular acupuncture for pain relief after total hip arthroplasty - a  
20 547 randomized controlled study. *Pain* 2005;114(3):320-27. doi: 10.1016/j.pain.2004.08.021 [published Online First:  
22 548 2005/03/22]
- 24549 38. White P, Lewith G, Prescott P, et al. Acupuncture versus placebo for the treatment of chronic mechanical neck pain: a  
25550 randomized, controlled trial. *Ann Intern Med* 2004;141(12):911-19. doi: 10.7326/0003-4819-141-12-200412210-  
26 551 00007 [published Online First: 2004/12/22]
- 28552 39. Gaubeca-Gilarranz A, Fernandez-de-Las-Penas C, Medina-Torres JR, et al. Effectiveness of dry needling of rectus  
29553 abdominis trigger points for the treatment of primary dysmenorrhoea: a randomised parallel-group trial. *Acupunct*  
30 554 *Med* 2018;36(5):302-10. doi: 10.1136/acupmed-2017-011566 [published Online First: 2018/05/04]
- 32555 40. Kennedy S, Baxter GD, Kerr DP, et al. Acupuncture for acute non-specific low back pain: a pilot randomised non-  
33 556 penetrating sham controlled trial. *Complement Ther Med* 2008;16(3):139-46. doi: 10.1016/j.ctim.2007.03.001  
34 557 [published Online First: 2008/06/07]
- 36558 41. Lv Y, He H, Xie J, et al. Effects of transcutaneous acupoint electrical stimulation combined with low-dose sufentanil  
37 559 pretreatment on the incidence and severity of etomidate-induced myoclonus: A randomized controlled trial.  
38 560 *Medicine (Baltimore)* 2018;97(23):e10969. doi: 10.1097/MD.0000000000010969 [published Online First:  
40561 2018/06/08]
- 41 562 42. Ma W, Bai W, Lin C, et al. Effects of Sanyinjiao (SP6) with electroacupuncture on labour pain in women during labour.  
42 563 *Complement Ther Med* 2011;19 Suppl 1:S13-8. doi: 10.1016/j.ctim.2010.09.001 [published Online First:  
43 564 2011/01/05]
- 45 565 43. Mavrommatis CI, Argyra E, Vadalouka A, et al. Acupuncture as an adjunctive therapy to pharmacological treatment  
46 566 in patients with chronic pain due to osteoarthritis of the knee: a 3-armed, randomized, placebo-controlled trial.  
48 567 *Pain* 2012;153(8):1720-26. doi: 10.1016/j.pain.2012.05.005 [published Online First: 2012/06/26]
- 49 568 44. Ng SSM, Leung WW, Mak TWC, et al. Electroacupuncture reduces duration of postoperative ileus after laparoscopic  
50 569 surgery for colorectal cancer. *Gastroenterology* 2013;144(2):307-13 e1. doi: 10.1053/j.gastro.2012.10.050  
52 570 [published Online First: 2012/11/13]
- 53 571 45. Sui M, Jiang N, Yan L, et al. Effect of Electroacupuncture on Shoulder Subluxation in Poststroke Patients with  
54 572 Hemiplegic Shoulder Pain: A Sham-Controlled Study Using Multidimensional Musculoskeletal Ultrasound  
56 573 Assessment. *Pain Res Manag* 2021;2021:5329881. doi: 10.1155/2021/5329881 [published Online First:  
57 574 2021/11/30]
- 59575 46. Tabassi KT, Amini P, Mohammadi S, et al. The effect of acupuncture on pain score after open kidney surgery. *J*  
60

- 1  
2  
3 576 *Complement Integr Med* 2015;12(3):241-44. doi: 10.1515/jcim-2014-0071 [published Online First: 2015/04/30]  
4  
5 577 47. Wang X, Yin X, Guo XT, et al. Effects of the pestle needle therapy, a type of acupoint stimulation, on post-  
6 578 hemorrhoidectomy pain: A randomized controlled trial. *J Integr Med* 2020;18(6):492-98. doi:  
7 579 10.1016/j.joim.2020.08.001 [published Online First: 2020/08/17]  
8  
9 580 48. Wong RH, Lee TW, Sihoe AD, et al. Analgesic effect of electroacupuncture in postthoracotomy pain: a prospective  
10581 randomized trial. *Ann Thorac Surg* 2006;81(6):2031-6. doi: 10.1016/j.athoracsur.2005.12.064 [published Online  
11582 First: 2006/05/30]  
12  
13583 49. Yu X, Zhang F, Chen B. The effect of TEAS on the quality of early recovery in patients undergoing gynecological  
14584 laparoscopic surgery: a prospective, randomized, placebo-controlled trial. *Trials* 2020;21(1):43. doi:  
15585 10.1186/s13063-019-3892-4 [published Online First: 2020/01/10]  
17586 50. Zheng LH, Sun H, Wang GN, et al. Effect of transcutaneous electrical acupoint stimulation on nausea and vomiting  
18587 induced by patient controlled intravenous analgesia with tramadol. *Chin J Integr Med* 2008;14(1):61-4. doi:  
19588 10.1007/s11655-007-9006  
21589 10.1007/s11655-007-9006-2 [published Online First: 2008/01/26]  
22590 51. Chen J, Zhang Y, Li X, et al. Efficacy of transcutaneous electrical acupoint stimulation combined with general  
23591 anesthesia for sedation and postoperative analgesia in minimally invasive lung cancer surgery: A randomized,  
25592 double-blind, placebo-controlled trial. *Thorac Cancer* 2020;11(4):928-34. doi: 10.1111/1759-7714.13343  
26593 [published Online First: 2020/02/18]  
27594 52. Fleckenstein J, Baeumler P, Gurschler C, et al. Acupuncture reduces the time from extubation to 'ready for discharge'  
29595 from the post anaesthesia care unit: results from the randomised controlled AcuARP trial. *Sci Rep*  
30596 2018;8(1):15734. doi: 10.1038/s41598-018-33459-y [published Online First: 2018/10/26]  
32597 53. Cabrini L, Gioia L, Gemma M, et al. Bispectral index evaluation of the sedative effect of acupuncture in healthy  
33598 volunteers. *J Clin Monit Comput* 2006;20(5):311-5. doi: 10.1007/s10877-006-9026-z [published Online First:  
34599 2006/09/22]  
36600 54. Zheng X, Meng JB, Fang Q. Electroacupuncture reduces the dose of midazolam monitored by the bispectral index in  
37601 critically ill patients with mechanical ventilation: an exploratory study. *Acupunct Med* 2012;30(2):78-84. doi:  
38602 10.1136/acupmed-2011-010095 [published Online First: 2012/03/31]  
40603 55. Feng X, Li J, Wu L, et al. Effect of combined electroacupuncture and epidural anesthesia in gynecological operation  
41604 evaluated by bispectral index. *Zhongguo Zhong Xi Yi Jie He Za Zhi* 2010;30(02):150-52.(Chinese).  
42605 56. Zheng X, Wan L, Gao F, et al. Effect of ear point embedding on plasma and effect site concentrations of propofol-  
44606 remifentanyl in elderly patients after target-controlled induction. *Zhongguo Zhen Jiu* 2017;37(08):869-73. Chinese.  
45607 doi: 10.13703/j.0255-2930.2017.08.017  
46608 57. Lee KC, Chao YC, Lin YP, et al. Effectiveness of Self-administered Acupressure for Family Caregivers of Advanced  
48609 Cancer Patients With Insomnia: A Randomized Controlled Trial. *Cancer Nurs* 2022;45(1):E1-E9. doi:  
49610 10.1097/NCC.0000000000000870 [published Online First: 2020/08/03]  
51611 58. Chen QQ, Wei QL, Zhang XH. Effects of electroacupuncture on supplementary analgesia and improvement of adverse  
52612 reactions induced by dolantin in oocyte retrieval. *Zhongguo Zhen Jiu* 2012;32(12):1113-16.  
53613 59. Xiao J, Yi W, Wu L. Effects of electroacupuncture on reducing labor pain and complications in the labor analgesia  
54614 process of combined spinal-epidural analgesia with patient-controlled epidural analgesia. *Arch Gynecol Obstet*  
56615 2019;299(1):123-28. doi: 10.1007/s00404-018-4955-6 [published Online First: 2018/11/15]  
57616 60. Chen TY, Zhou J, Wang K, et al. Electroacupuncture Intervention Combined with Anesthetics for Analgesia and Post-  
59617 surgical Gastrointestinal Recovery in Pneumectomy Patients. *Zhen Ci Yan Jiu* 2019;40(6):461-64.  
60

- 1  
2  
3 618 61. Meldrum ML. A brief history of the randomized controlled trial - From oranges and lemons to the gold standard.  
4  
5 619 *Hematology-Oncology Clinics of North America* 2000;14(4):745-60. doi: 10.1016/s0889-8588(05)70309-9  
6 620 62. Boutron I, Guittet L, Estellat C, et al. Reporting methods of blinding in randomized trials assessing nonpharmacological  
7 621 treatments. *Plos Medicine* 2007;4(2):370-80. doi: 10.1371/journal.pmed.0040061  
8  
9 622 63. Chen Z-x, Li Y, Zhang X-g, et al. Sham Electroacupuncture Methods in Randomized Controlled Trials. *Scientific*  
10 623 *Reports* 2017;7:40837. doi: 10.1038/srep40837  
11  
12 624 64. Lund I, Lundeberg T. Are minimal, superficial or sham acupuncture procedures acceptable as inert placebo controls?  
13 625 *Acupuncture in medicine : journal of the British Medical Acupuncture Society* 2006;24(1):13-5.  
14 626 65. Lundeberg T, Lund I, Naslund J, et al. The Emperor's sham - wrong assumption that sham needling is sham.  
15 627 *Acupuncture in Medicine* 2008;26(4):239-42. doi: 10.1136/aim.26.4.239  
16  
17 628 66. Kim T-H, Lee MS, Alraek T, et al. Acupuncture in sham device controlled trials may not be as effective as acupuncture  
18 629 in the real world: a preliminary network meta-analysis of studies of acupuncture for hot flashes in menopausal  
19  
20 630 women. *Acupuncture in Medicine* 2020;38(1):37-44. doi: 10.1136/acupmed-2018-011671  
21  
22 631  
23  
24  
25 632  
26  
27  
28  
29  
30  
31  
32  
33  
34  
35  
36  
37  
38  
39  
40  
41  
42  
43  
44  
45  
46  
47  
48  
49  
50  
51  
52  
53  
54  
55  
56  
57  
58  
59  
60

1  
2  
3  
4  
5  
6  
7  
8  
9  
10  
11  
12  
13  
14  
15  
16  
17  
18  
19  
20  
21  
22  
23  
24  
25  
26  
27  
28  
29  
30  
31  
32  
33  
34  
35  
36  
37  
38  
39  
40  
41  
42  
43  
44  
45  
46  
47  
48  
49  
50  
51  
52  
53  
54  
55  
56  
57  
58  
59  
60

633 Figure legend:

634 Figure 1. Trial design of PASSION study

635 Figure 2. Illustration of the sham points

636 Figure 3. Forest plot of AC group versus NAC group.

637 Figure 4. Forest plot of AC group versus NAC group.

For peer review only

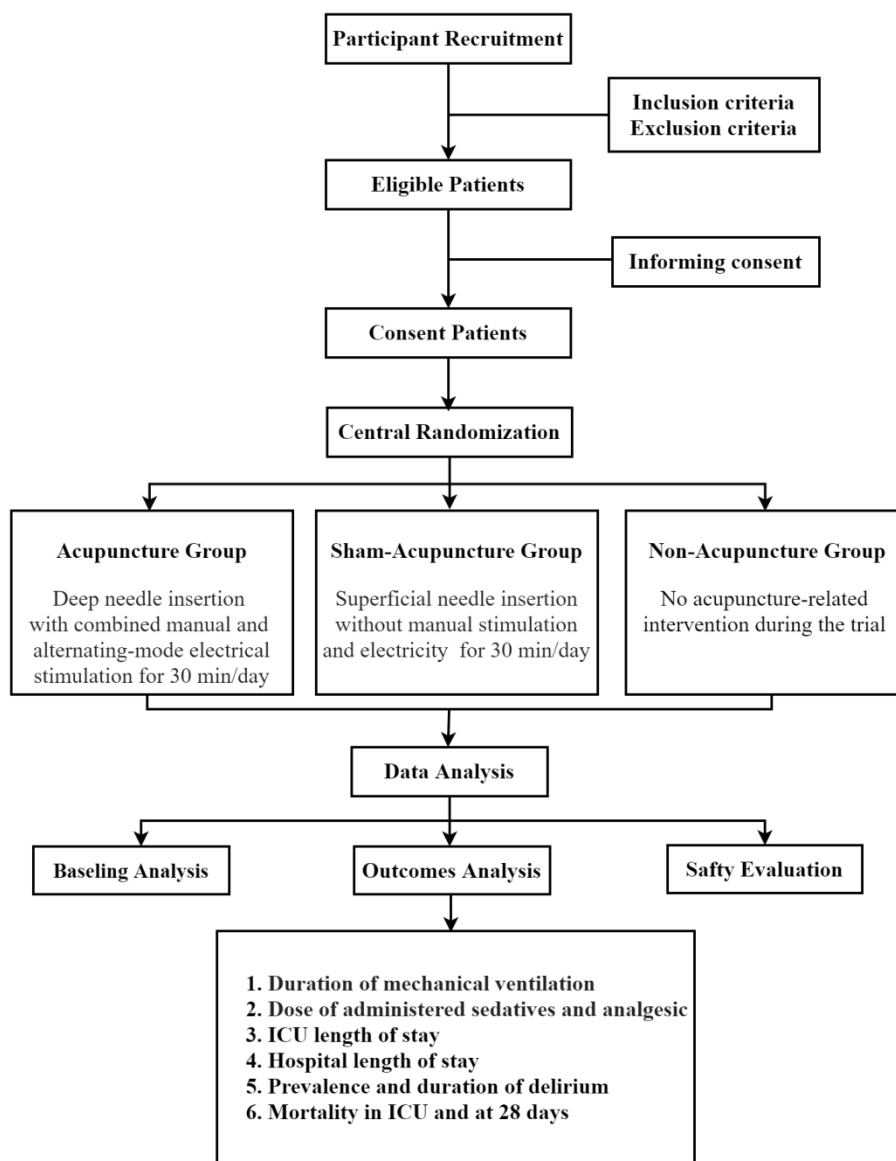

Figure 1

543x691mm (72 x 72 DPI)

1  
2  
3  
4  
5  
6  
7  
8  
9  
10  
11  
12  
13  
14  
15  
16  
17  
18  
19  
20  
21  
22  
23  
24  
25  
26  
27  
28  
29  
30  
31  
32  
33  
34  
35  
36  
37  
38  
39  
40  
41  
42  
43  
44  
45  
46  
47  
48  
49  
50  
51  
52  
53  
54  
55  
56  
57  
58  
59  
60

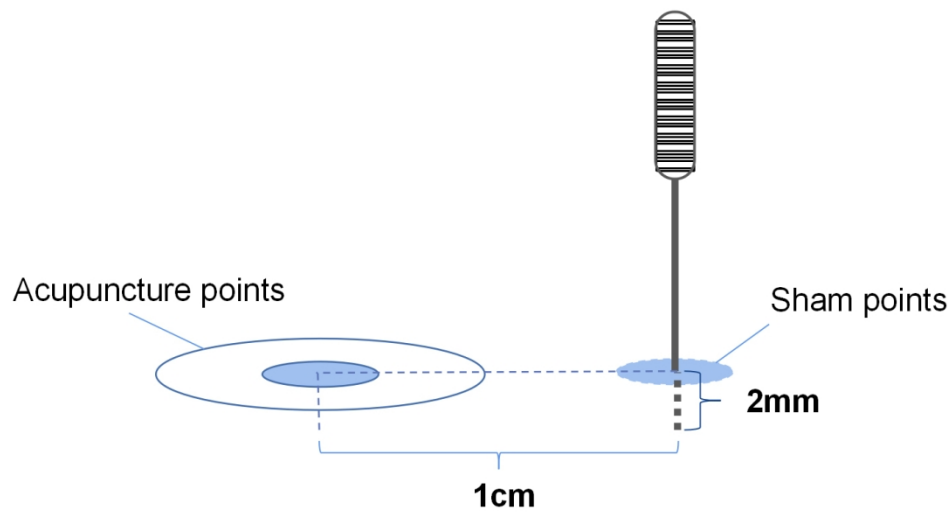

Figure 2

398x221mm (96 x 96 DPI)



Figure3

199x162mm (300 x 300 DPI)

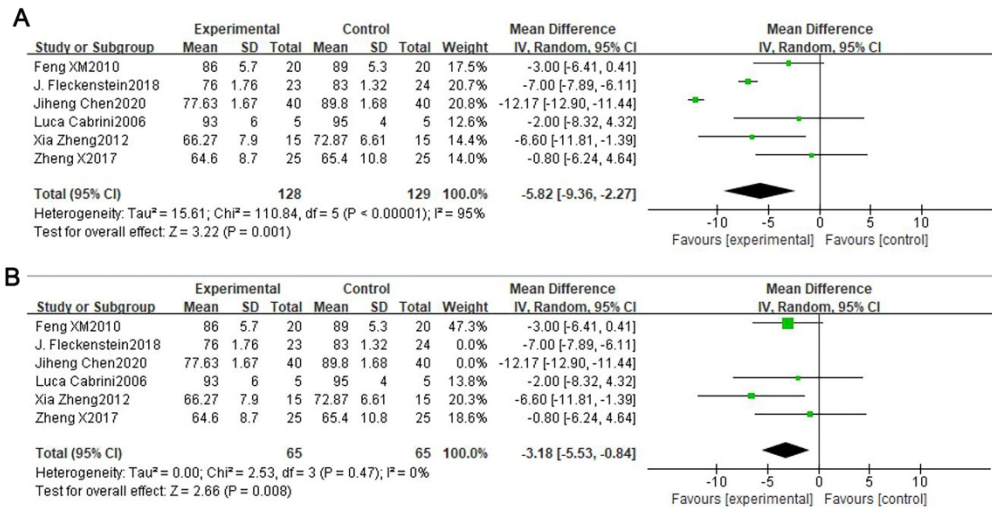

Figure 4

199x101mm (300 x 300 DPI)



# Reporting checklist for protocol of a clinical trial.

Based on the SPIRIT guidelines.

## Instructions to authors

Complete this checklist by entering the page numbers from your manuscript where readers will find each of the items listed below.

Your article may not currently address all the items on the checklist. Please modify your text to include the missing information. If you are certain that an item does not apply, please write "n/a" and provide a short explanation.

Upload your completed checklist as an extra file when you submit to a journal.

In your methods section, say that you used the SPIRIT reporting guidelines, and cite them as:

Chan A-W, Tetzlaff JM, Gøtzsche PC, Altman DG, Mann H, Berlin J, Dickersin K, Hróbjartsson A, Schulz KF, Parulekar WR, Krleža-Jerić K, Laupacis A, Moher D. SPIRIT 2013 Explanation and Elaboration: Guidance for protocols of clinical trials. *BMJ*. 2013;346:e7586

|                                   |                     | Reporting Item                                                                                               | Page Number                           |
|-----------------------------------|---------------------|--------------------------------------------------------------------------------------------------------------|---------------------------------------|
| <b>Administrative information</b> |                     |                                                                                                              |                                       |
| Title                             | <a href="#">#1</a>  | Descriptive title identifying the study design, population, interventions, and, if applicable, trial acronym | Page 1, line 1-4.                     |
| Trial registration                | <a href="#">#2a</a> | Trial identifier and registry name. If not yet registered, name of intended registry                         | Page 3, line 58;<br>Page 7, line 130. |
| Trial registration: data set      | <a href="#">#2b</a> | All items from the World Health Organization Trial Registration Data Set                                     | n/a                                   |
| Protocol version                  | <a href="#">#3</a>  | Date and version identifier                                                                                  | n/a                                   |
| Funding                           | <a href="#">#4</a>  | Sources and types of financial, material, and other support                                                  | Page 18, line 427-434.                |

|    |                      |                     |                                                          |           |
|----|----------------------|---------------------|----------------------------------------------------------|-----------|
| 1  | Roles and            | <a href="#">#5a</a> | Names, affiliations, and roles of protocol contributors  | Page 1;   |
| 2  | responsibilities:    |                     |                                                          |           |
| 3  | contributorship      |                     |                                                          | Page 18-  |
| 4  |                      |                     |                                                          | 19, line  |
| 5  |                      |                     |                                                          | 444-449.  |
| 6  |                      |                     |                                                          |           |
| 7  |                      |                     |                                                          |           |
| 8  | Roles and            | <a href="#">#5b</a> | Name and contact information for the trial sponsor       | Page 18,  |
| 9  | responsibilities:    |                     |                                                          | line 427- |
| 10 | sponsor contact      |                     |                                                          | 434.      |
| 11 | information          |                     |                                                          |           |
| 12 |                      |                     |                                                          |           |
| 13 |                      |                     |                                                          |           |
| 14 |                      |                     |                                                          |           |
| 15 | Roles and            | <a href="#">#5c</a> | Role of study sponsor and funders, if any, in study      | Page 18,  |
| 16 | responsibilities:    |                     | design; collection, management, analysis, and            | line 435- |
| 17 | sponsor and funder   |                     | interpretation of data; writing of the report; and the   | 438.      |
| 18 |                      |                     | decision to submit the report for publication, including |           |
| 19 |                      |                     | whether they will have ultimate authority over any of    |           |
| 20 |                      |                     | these activities                                         |           |
| 21 |                      |                     |                                                          |           |
| 22 |                      |                     |                                                          |           |
| 23 |                      |                     |                                                          |           |
| 24 |                      |                     |                                                          |           |
| 25 | Roles and            | <a href="#">#5d</a> | Composition, roles, and responsibilities of the          | Page 13,  |
| 26 | responsibilities:    |                     | coordinating centre, steering committee, endpoint        | line 290- |
| 27 | committees           |                     | adjudication committee, data management team, and        | 292.      |
| 28 |                      |                     | other individuals or groups overseeing the trial, if     |           |
| 29 |                      |                     | applicable (see Item 21a for data monitoring committee)  |           |
| 30 |                      |                     |                                                          |           |
| 31 |                      |                     |                                                          |           |
| 32 |                      |                     |                                                          |           |
| 33 | <b>Introduction</b>  |                     |                                                          |           |
| 34 |                      |                     |                                                          |           |
| 35 |                      |                     |                                                          |           |
| 36 | Background and       | <a href="#">#6a</a> | Description of research question and justification for   | Page 5,   |
| 37 | rationale            |                     | undertaking the trial, including summary of relevant     | line 77-  |
| 38 |                      |                     | studies (published and unpublished) examining benefits   | 100.      |
| 39 |                      |                     | and harms for each intervention                          |           |
| 40 |                      |                     |                                                          |           |
| 41 |                      |                     |                                                          |           |
| 42 |                      |                     |                                                          |           |
| 43 | Background and       | <a href="#">#6b</a> | Explanation for choice of comparators                    | Page 6,   |
| 44 | rationale: choice of |                     |                                                          | line 106- |
| 45 | comparators          |                     |                                                          | 107.      |
| 46 |                      |                     |                                                          |           |
| 47 |                      |                     |                                                          |           |
| 48 | Objectives           | <a href="#">#7</a>  | Specific objectives or hypotheses                        | Page 6,   |
| 49 |                      |                     |                                                          | line 103- |
| 50 |                      |                     |                                                          | 107.      |
| 51 |                      |                     |                                                          |           |
| 52 |                      |                     |                                                          |           |
| 53 | Trial design         | <a href="#">#8</a>  | Description of trial design including type of trial (eg, | Page 5-6, |
| 54 |                      |                     | parallel group, crossover, factorial, single group),     | line 101- |
| 55 |                      |                     | allocation ratio, and framework (eg, superiority,        | 103.      |
| 56 |                      |                     | equivalence, non-inferiority, exploratory)               |           |
| 57 |                      |                     |                                                          |           |
| 58 |                      |                     |                                                          |           |
| 59 |                      |                     |                                                          |           |
| 60 |                      |                     |                                                          |           |

1 **Methods:**

2 **Participants,**

3 **interventions, and**

4 **outcomes**

|    |                      |                                                                                                                                                                                                                       |                         |
|----|----------------------|-----------------------------------------------------------------------------------------------------------------------------------------------------------------------------------------------------------------------|-------------------------|
| 5  |                      |                                                                                                                                                                                                                       |                         |
| 6  |                      |                                                                                                                                                                                                                       |                         |
| 7  |                      |                                                                                                                                                                                                                       |                         |
| 8  | Study setting        | <a href="#">#9</a> Description of study settings (eg, community clinic, academic hospital) and list of countries where data will be collected. Reference to where list of study sites can be obtained                 | Page 6, line 112-113.   |
| 9  |                      |                                                                                                                                                                                                                       |                         |
| 10 |                      |                                                                                                                                                                                                                       |                         |
| 11 |                      |                                                                                                                                                                                                                       |                         |
| 12 |                      |                                                                                                                                                                                                                       |                         |
| 13 |                      |                                                                                                                                                                                                                       |                         |
| 14 |                      |                                                                                                                                                                                                                       |                         |
| 15 | Eligibility criteria | <a href="#">#10</a> Inclusion and exclusion criteria for participants. If applicable, eligibility criteria for study centres and individuals who will perform the interventions (eg, surgeons, psychotherapists)      | Page 7-8, line 144-157. |
| 16 |                      |                                                                                                                                                                                                                       |                         |
| 17 |                      |                                                                                                                                                                                                                       |                         |
| 18 |                      |                                                                                                                                                                                                                       |                         |
| 19 |                      |                                                                                                                                                                                                                       |                         |
| 20 |                      |                                                                                                                                                                                                                       | Page 8,                 |
| 21 |                      |                                                                                                                                                                                                                       | line 159-               |
| 22 |                      |                                                                                                                                                                                                                       | 164;                    |
| 23 |                      |                                                                                                                                                                                                                       |                         |
| 24 |                      |                                                                                                                                                                                                                       |                         |
| 25 |                      |                                                                                                                                                                                                                       | Page 10,                |
| 26 |                      |                                                                                                                                                                                                                       | line 210-               |
| 27 |                      |                                                                                                                                                                                                                       | 213;                    |
| 28 |                      |                                                                                                                                                                                                                       |                         |
| 29 |                      |                                                                                                                                                                                                                       |                         |
| 30 |                      |                                                                                                                                                                                                                       |                         |
| 31 |                      |                                                                                                                                                                                                                       |                         |
| 32 |                      |                                                                                                                                                                                                                       |                         |
| 33 | Interventions:       | <a href="#">#11a</a> Interventions for each group with sufficient detail to allow replication, including how and when they will be administered                                                                       | Page 9-                 |
| 34 | description          |                                                                                                                                                                                                                       | 10, line                |
| 35 |                      |                                                                                                                                                                                                                       | 188-213;                |
| 36 |                      |                                                                                                                                                                                                                       |                         |
| 37 |                      |                                                                                                                                                                                                                       |                         |
| 38 |                      |                                                                                                                                                                                                                       |                         |
| 39 |                      |                                                                                                                                                                                                                       |                         |
| 40 |                      |                                                                                                                                                                                                                       |                         |
| 41 | Interventions:       | <a href="#">#11b</a> Criteria for discontinuing or modifying allocated interventions for a given trial participant (eg, drug dose change in response to harms, participant request, or improving / worsening disease) | Page 13,                |
| 42 | modifications        |                                                                                                                                                                                                                       | line 286-               |
| 43 |                      |                                                                                                                                                                                                                       | 290;                    |
| 44 |                      |                                                                                                                                                                                                                       |                         |
| 45 |                      |                                                                                                                                                                                                                       |                         |
| 46 |                      |                                                                                                                                                                                                                       |                         |
| 47 |                      |                                                                                                                                                                                                                       |                         |
| 48 | Interventions:       | <a href="#">#11c</a> Strategies to improve adherence to intervention protocols, and any procedures for monitoring adherence (eg, drug tablet return; laboratory tests)                                                | Page 8,                 |
| 49 | adherence            |                                                                                                                                                                                                                       | line 207-               |
| 50 |                      |                                                                                                                                                                                                                       | 209.                    |
| 51 |                      |                                                                                                                                                                                                                       |                         |
| 52 |                      |                                                                                                                                                                                                                       |                         |
| 53 |                      |                                                                                                                                                                                                                       |                         |
| 54 |                      |                                                                                                                                                                                                                       |                         |
| 55 |                      |                                                                                                                                                                                                                       |                         |
| 56 | Interventions:       | <a href="#">#11d</a> Relevant concomitant care and interventions that are permitted or prohibited during the trial                                                                                                    | n/a                     |
| 57 | concomitant care     |                                                                                                                                                                                                                       |                         |
| 58 |                      |                                                                                                                                                                                                                       |                         |
| 59 |                      |                                                                                                                                                                                                                       |                         |
| 60 |                      |                                                                                                                                                                                                                       |                         |

|    |                                  |                      |                                                                                                                                                                                                                                                                                                                                                                                |                        |
|----|----------------------------------|----------------------|--------------------------------------------------------------------------------------------------------------------------------------------------------------------------------------------------------------------------------------------------------------------------------------------------------------------------------------------------------------------------------|------------------------|
| 1  | Outcomes                         | <a href="#">#12</a>  | Primary, secondary, and other outcomes, including the specific measurement variable (eg, systolic blood pressure), analysis metric (eg, change from baseline, final value, time to event), method of aggregation (eg, median, proportion), and time point for each outcome. Explanation of the clinical relevance of chosen efficacy and harm outcomes is strongly recommended | Page 13, line 294-302; |
| 2  |                                  |                      |                                                                                                                                                                                                                                                                                                                                                                                |                        |
| 3  |                                  |                      |                                                                                                                                                                                                                                                                                                                                                                                |                        |
| 4  |                                  |                      |                                                                                                                                                                                                                                                                                                                                                                                |                        |
| 5  |                                  |                      |                                                                                                                                                                                                                                                                                                                                                                                |                        |
| 6  |                                  |                      |                                                                                                                                                                                                                                                                                                                                                                                |                        |
| 7  |                                  |                      |                                                                                                                                                                                                                                                                                                                                                                                |                        |
| 8  |                                  |                      |                                                                                                                                                                                                                                                                                                                                                                                |                        |
| 9  |                                  |                      |                                                                                                                                                                                                                                                                                                                                                                                |                        |
| 10 |                                  |                      |                                                                                                                                                                                                                                                                                                                                                                                |                        |
| 11 |                                  |                      |                                                                                                                                                                                                                                                                                                                                                                                |                        |
| 12 | Participant timeline             | <a href="#">#13</a>  | Time schedule of enrolment, interventions (including any run-ins and washouts), assessments, and visits for participants. A schematic diagram is highly recommended (see Figure)                                                                                                                                                                                               | Page 9, line 183-187.  |
| 13 |                                  |                      |                                                                                                                                                                                                                                                                                                                                                                                |                        |
| 14 |                                  |                      |                                                                                                                                                                                                                                                                                                                                                                                |                        |
| 15 |                                  |                      |                                                                                                                                                                                                                                                                                                                                                                                |                        |
| 16 |                                  |                      |                                                                                                                                                                                                                                                                                                                                                                                |                        |
| 17 |                                  |                      |                                                                                                                                                                                                                                                                                                                                                                                |                        |
| 18 |                                  |                      |                                                                                                                                                                                                                                                                                                                                                                                |                        |
| 19 |                                  |                      |                                                                                                                                                                                                                                                                                                                                                                                |                        |
| 20 | Sample size                      | <a href="#">#14</a>  | Estimated number of participants needed to achieve study objectives and how it was determined, including clinical and statistical assumptions supporting any sample size calculations                                                                                                                                                                                          | Page 14, line 325-331; |
| 21 |                                  |                      |                                                                                                                                                                                                                                                                                                                                                                                |                        |
| 22 |                                  |                      |                                                                                                                                                                                                                                                                                                                                                                                |                        |
| 23 |                                  |                      |                                                                                                                                                                                                                                                                                                                                                                                |                        |
| 24 |                                  |                      |                                                                                                                                                                                                                                                                                                                                                                                |                        |
| 25 |                                  |                      |                                                                                                                                                                                                                                                                                                                                                                                |                        |
| 26 |                                  |                      |                                                                                                                                                                                                                                                                                                                                                                                |                        |
| 27 |                                  |                      |                                                                                                                                                                                                                                                                                                                                                                                |                        |
| 28 | Recruitment                      | <a href="#">#15</a>  | Strategies for achieving adequate participant enrolment to reach target sample size                                                                                                                                                                                                                                                                                            | Page 14, line 330-331. |
| 29 |                                  |                      |                                                                                                                                                                                                                                                                                                                                                                                |                        |
| 30 |                                  |                      |                                                                                                                                                                                                                                                                                                                                                                                |                        |
| 31 |                                  |                      |                                                                                                                                                                                                                                                                                                                                                                                |                        |
| 32 |                                  |                      |                                                                                                                                                                                                                                                                                                                                                                                |                        |
| 33 |                                  |                      |                                                                                                                                                                                                                                                                                                                                                                                |                        |
| 34 |                                  |                      |                                                                                                                                                                                                                                                                                                                                                                                |                        |
| 35 | <b>Methods:</b>                  |                      |                                                                                                                                                                                                                                                                                                                                                                                |                        |
| 36 | <b>Assignment of</b>             |                      |                                                                                                                                                                                                                                                                                                                                                                                |                        |
| 37 | <b>interventions (for</b>        |                      |                                                                                                                                                                                                                                                                                                                                                                                |                        |
| 38 | <b>controlled trials)</b>        |                      |                                                                                                                                                                                                                                                                                                                                                                                |                        |
| 39 |                                  |                      |                                                                                                                                                                                                                                                                                                                                                                                |                        |
| 40 |                                  |                      |                                                                                                                                                                                                                                                                                                                                                                                |                        |
| 41 |                                  |                      |                                                                                                                                                                                                                                                                                                                                                                                |                        |
| 42 | Allocation: sequence generation  | <a href="#">#16a</a> | Method of generating the allocation sequence (eg, computer-generated random numbers), and list of any factors for stratification. To reduce predictability of a random sequence, details of any planned restriction (eg, blocking) should be provided in a separate document that is unavailable to those who enrol participants or assign interventions                       | Page 8, line 166-175.  |
| 43 |                                  |                      |                                                                                                                                                                                                                                                                                                                                                                                |                        |
| 44 |                                  |                      |                                                                                                                                                                                                                                                                                                                                                                                |                        |
| 45 |                                  |                      |                                                                                                                                                                                                                                                                                                                                                                                |                        |
| 46 |                                  |                      |                                                                                                                                                                                                                                                                                                                                                                                |                        |
| 47 |                                  |                      |                                                                                                                                                                                                                                                                                                                                                                                |                        |
| 48 |                                  |                      |                                                                                                                                                                                                                                                                                                                                                                                |                        |
| 49 |                                  |                      |                                                                                                                                                                                                                                                                                                                                                                                |                        |
| 50 |                                  |                      |                                                                                                                                                                                                                                                                                                                                                                                |                        |
| 51 |                                  |                      |                                                                                                                                                                                                                                                                                                                                                                                |                        |
| 52 |                                  |                      |                                                                                                                                                                                                                                                                                                                                                                                |                        |
| 53 | Allocation concealment mechanism | <a href="#">#16b</a> | Mechanism of implementing the allocation sequence (eg, central telephone; sequentially numbered, opaque, sealed envelopes), describing any steps to conceal the sequence until interventions are assigned                                                                                                                                                                      | Page 8, line 166-175.  |
| 54 |                                  |                      |                                                                                                                                                                                                                                                                                                                                                                                |                        |
| 55 |                                  |                      |                                                                                                                                                                                                                                                                                                                                                                                |                        |
| 56 |                                  |                      |                                                                                                                                                                                                                                                                                                                                                                                |                        |
| 57 |                                  |                      |                                                                                                                                                                                                                                                                                                                                                                                |                        |
| 58 |                                  |                      |                                                                                                                                                                                                                                                                                                                                                                                |                        |
| 59 |                                  |                      |                                                                                                                                                                                                                                                                                                                                                                                |                        |
| 60 |                                  |                      |                                                                                                                                                                                                                                                                                                                                                                                |                        |

|    |                        |                      |                                                             |           |
|----|------------------------|----------------------|-------------------------------------------------------------|-----------|
| 1  | Allocation:            | <a href="#">#16c</a> | Who will generate the allocation sequence, who will         | Page 8,   |
| 2  | implementation         |                      | enrol participants, and who will assign participants to     | line 169- |
| 3  |                        |                      | interventions                                               | 175.      |
| 4  |                        |                      |                                                             |           |
| 5  |                        |                      |                                                             |           |
| 6  | Blinding (masking)     | <a href="#">#17a</a> | Who will be blinded after assignment to interventions       | Page 8,   |
| 7  |                        |                      | (eg, trial participants, care providers, outcome            | line 179- |
| 8  |                        |                      | assessors, data analysts), and how                          | 181.      |
| 9  |                        |                      |                                                             |           |
| 10 |                        |                      |                                                             |           |
| 11 |                        |                      |                                                             |           |
| 12 |                        |                      |                                                             |           |
| 13 |                        |                      |                                                             |           |
| 14 | Blinding (masking):    | <a href="#">#17b</a> | If blinded, circumstances under which unblinding is         | Page 13,  |
| 15 | emergency unblinding   |                      | permissible, and procedure for revealing a participant's    | line 286- |
| 16 |                        |                      | allocated intervention during the trial                     | 290.      |
| 17 |                        |                      |                                                             |           |
| 18 |                        |                      |                                                             |           |
| 19 |                        |                      |                                                             |           |
| 20 |                        |                      |                                                             |           |
| 21 | <b>Methods: Data</b>   |                      |                                                             |           |
| 22 | <b>collection,</b>     |                      |                                                             |           |
| 23 | <b>management, and</b> |                      |                                                             |           |
| 24 | <b>analysis</b>        |                      |                                                             |           |
| 25 |                        |                      |                                                             |           |
| 26 |                        |                      |                                                             |           |
| 27 |                        |                      |                                                             |           |
| 28 | Data collection plan   | <a href="#">#18a</a> | Plans for assessment and collection of outcome,             | Page 13-  |
| 29 |                        |                      | baseline, and other trial data, including any related       | 14,       |
| 30 |                        |                      | processes to promote data quality (eg, duplicate            | line 309- |
| 31 |                        |                      | measurements, training of assessors) and a description      | 320.      |
| 32 |                        |                      | of study instruments (eg, questionnaires, laboratory        |           |
| 33 |                        |                      | tests) along with their reliability and validity, if known. |           |
| 34 |                        |                      | Reference to where data collection forms can be found,      |           |
| 35 |                        |                      | if not in the protocol                                      |           |
| 36 |                        |                      |                                                             |           |
| 37 |                        |                      |                                                             |           |
| 38 |                        |                      |                                                             |           |
| 39 |                        |                      |                                                             |           |
| 40 |                        |                      |                                                             |           |
| 41 | Data collection plan:  | <a href="#">#18b</a> | Plans to promote participant retention and complete         | Page 10,  |
| 42 | retention              |                      | follow-up, including list of any outcome data to be         | line 207- |
| 43 |                        |                      | collected for participants who discontinue or deviate from  | 209.      |
| 44 |                        |                      | intervention protocols                                      |           |
| 45 |                        |                      |                                                             |           |
| 46 |                        |                      |                                                             |           |
| 47 |                        |                      |                                                             |           |
| 48 |                        |                      |                                                             |           |
| 49 | Data management        | <a href="#">#19</a>  | Plans for data entry, coding, security, and storage,        | Page 14,  |
| 50 |                        |                      | including any related processes to promote data quality     | line 320  |
| 51 |                        |                      | (eg, double data entry; range checks for data values).      |           |
| 52 |                        |                      | Reference to where details of data management               |           |
| 53 |                        |                      | procedures can be found, if not in the protocol             |           |
| 54 |                        |                      |                                                             |           |
| 55 |                        |                      |                                                             |           |
| 56 |                        |                      |                                                             |           |
| 57 | Statistics: outcomes   | <a href="#">#20a</a> | Statistical methods for analysing primary and secondary     | Page 14-  |
| 58 |                        |                      | outcomes. Reference to where other details of the           | 15, line  |
| 59 |                        |                      |                                                             |           |
| 60 |                        |                      |                                                             |           |

|    |                            |                                                                                  |           |
|----|----------------------------|----------------------------------------------------------------------------------|-----------|
| 1  |                            | statistical analysis plan can be found, if not in the                            | 332-349.  |
| 2  |                            | protocol                                                                         |           |
| 3  |                            |                                                                                  |           |
| 4  |                            |                                                                                  |           |
| 5  | Statistics: additional     | <a href="#">#20b</a> Methods for any additional analyses (eg, subgroup and       | Page14,   |
| 6  | analyses                   | adjusted analyses)                                                               | line 337- |
| 7  |                            |                                                                                  | 338.      |
| 8  |                            |                                                                                  |           |
| 9  |                            |                                                                                  |           |
| 10 |                            |                                                                                  |           |
| 11 |                            |                                                                                  |           |
| 12 | Statistics: analysis       | <a href="#">#20c</a> Definition of analysis population relating to protocol non- | Page14,   |
| 13 | population and             | adherence (eg, as randomised analysis), and any                                  | line 337- |
| 14 | missing data               | statistical methods to handle missing data (eg, multiple                         | 338.      |
| 15 |                            | imputation)                                                                      |           |
| 16 |                            |                                                                                  |           |
| 17 |                            |                                                                                  |           |
| 18 |                            |                                                                                  |           |
| 19 | <b>Methods: Monitoring</b> |                                                                                  |           |
| 20 |                            |                                                                                  |           |
| 21 | Data monitoring:           | <a href="#">#21a</a> Composition of data monitoring committee (DMC);             | Page13,   |
| 22 | formal committee           | summary of its role and reporting structure; statement of                        | line 290- |
| 23 |                            | whether it is independent from the sponsor and                                   | 292.      |
| 24 |                            | competing interests; and reference to where further                              |           |
| 25 |                            | details about its charter can be found, if not in the                            |           |
| 26 |                            | protocol. Alternatively, an explanation of why a DMC is                          |           |
| 27 |                            | not needed                                                                       |           |
| 28 |                            |                                                                                  |           |
| 29 |                            |                                                                                  |           |
| 30 |                            |                                                                                  |           |
| 31 |                            |                                                                                  |           |
| 32 |                            |                                                                                  |           |
| 33 | Data monitoring:           | <a href="#">#21b</a> Description of any interim analyses and stopping            | n/a       |
| 34 | interim analysis           | guidelines, including who will have access to these                              |           |
| 35 |                            | interim results and make the final decision to terminate                         |           |
| 36 |                            | the trial                                                                        |           |
| 37 |                            |                                                                                  |           |
| 38 |                            |                                                                                  |           |
| 39 |                            |                                                                                  |           |
| 40 | Harms                      | <a href="#">#22</a> Plans for collecting, assessing, reporting, and managing     | Page12,   |
| 41 |                            | solicited and spontaneously reported adverse events                              | line 286- |
| 42 |                            | and other unintended effects of trial interventions or trial                     | 292.      |
| 43 |                            | conduct                                                                          |           |
| 44 |                            |                                                                                  |           |
| 45 |                            |                                                                                  |           |
| 46 | Auditing                   | <a href="#">#23</a> Frequency and procedures for auditing trial conduct, if      | n/a       |
| 47 |                            | any, and whether the process will be independent from                            |           |
| 48 |                            | investigators and the sponsor                                                    |           |
| 49 |                            |                                                                                  |           |
| 50 |                            |                                                                                  |           |
| 51 |                            |                                                                                  |           |
| 52 | <b>Ethics and</b>          |                                                                                  |           |
| 53 | <b>dissemination</b>       |                                                                                  |           |
| 54 |                            |                                                                                  |           |
| 55 |                            |                                                                                  |           |
| 56 | Research ethics            | <a href="#">#24</a> Plans for seeking research ethics committee /                | Page 6-7, |
| 57 | approval                   | institutional review board (REC / IRB) approval                                  | line127-  |
| 58 |                            |                                                                                  | 129.      |
| 59 |                            |                                                                                  |           |
| 60 |                            |                                                                                  |           |

|    |                                             |                      |                                                                                                                                                                                                                                                                                     |                          |
|----|---------------------------------------------|----------------------|-------------------------------------------------------------------------------------------------------------------------------------------------------------------------------------------------------------------------------------------------------------------------------------|--------------------------|
| 1  | Protocol amendments                         | <a href="#">#25</a>  | Plans for communicating important protocol modifications (eg, changes to eligibility criteria, outcomes, analyses) to relevant parties (eg, investigators, REC / IRBs, trial participants, trial registries, journals, regulators)                                                  | n/a                      |
| 2  |                                             |                      |                                                                                                                                                                                                                                                                                     |                          |
| 3  |                                             |                      |                                                                                                                                                                                                                                                                                     |                          |
| 4  |                                             |                      |                                                                                                                                                                                                                                                                                     |                          |
| 5  |                                             |                      |                                                                                                                                                                                                                                                                                     |                          |
| 6  |                                             |                      |                                                                                                                                                                                                                                                                                     |                          |
| 7  |                                             |                      |                                                                                                                                                                                                                                                                                     |                          |
| 8  |                                             |                      |                                                                                                                                                                                                                                                                                     |                          |
| 9  | Consent or assent                           | <a href="#">#26a</a> | Who will obtain informed consent or assent from potential trial participants or authorised surrogates, and how (see Item 32)                                                                                                                                                        | Page 7, line135-137.     |
| 10 |                                             |                      |                                                                                                                                                                                                                                                                                     |                          |
| 11 |                                             |                      |                                                                                                                                                                                                                                                                                     |                          |
| 12 |                                             |                      |                                                                                                                                                                                                                                                                                     |                          |
| 13 |                                             |                      |                                                                                                                                                                                                                                                                                     |                          |
| 14 | Consent or assent: ancillary studies        | <a href="#">#26b</a> | Additional consent provisions for collection and use of participant data and biological specimens in ancillary studies, if applicable                                                                                                                                               | n/a                      |
| 15 |                                             |                      |                                                                                                                                                                                                                                                                                     |                          |
| 16 |                                             |                      |                                                                                                                                                                                                                                                                                     |                          |
| 17 |                                             |                      |                                                                                                                                                                                                                                                                                     |                          |
| 18 |                                             |                      |                                                                                                                                                                                                                                                                                     |                          |
| 19 |                                             |                      |                                                                                                                                                                                                                                                                                     |                          |
| 20 | Confidentiality                             | <a href="#">#27</a>  | How personal information about potential and enrolled participants will be collected, shared, and maintained in order to protect confidentiality before, during, and after the trial                                                                                                | Page13-14, line 309-320. |
| 21 |                                             |                      |                                                                                                                                                                                                                                                                                     |                          |
| 22 |                                             |                      |                                                                                                                                                                                                                                                                                     |                          |
| 23 |                                             |                      |                                                                                                                                                                                                                                                                                     |                          |
| 24 |                                             |                      |                                                                                                                                                                                                                                                                                     |                          |
| 25 |                                             |                      |                                                                                                                                                                                                                                                                                     |                          |
| 26 |                                             |                      |                                                                                                                                                                                                                                                                                     |                          |
| 27 | Declaration of interests                    | <a href="#">#28</a>  | Financial and other competing interests for principal investigators for the overall trial and each study site                                                                                                                                                                       | n/a                      |
| 28 |                                             |                      |                                                                                                                                                                                                                                                                                     |                          |
| 29 |                                             |                      |                                                                                                                                                                                                                                                                                     |                          |
| 30 |                                             |                      |                                                                                                                                                                                                                                                                                     |                          |
| 31 | Data access                                 | <a href="#">#29</a>  | Statement of who will have access to the final trial dataset, and disclosure of contractual agreements that limit such access for investigators                                                                                                                                     | n/a                      |
| 32 |                                             |                      |                                                                                                                                                                                                                                                                                     |                          |
| 33 |                                             |                      |                                                                                                                                                                                                                                                                                     |                          |
| 34 |                                             |                      |                                                                                                                                                                                                                                                                                     |                          |
| 35 |                                             |                      |                                                                                                                                                                                                                                                                                     |                          |
| 36 | Ancillary and post trial care               | <a href="#">#30</a>  | Provisions, if any, for ancillary and post-trial care, and for compensation to those who suffer harm from trial participation                                                                                                                                                       | n/a                      |
| 37 |                                             |                      |                                                                                                                                                                                                                                                                                     |                          |
| 38 |                                             |                      |                                                                                                                                                                                                                                                                                     |                          |
| 39 |                                             |                      |                                                                                                                                                                                                                                                                                     |                          |
| 40 |                                             |                      |                                                                                                                                                                                                                                                                                     |                          |
| 41 | Dissemination policy: trial results         | <a href="#">#31a</a> | Plans for investigators and sponsor to communicate trial results to participants, healthcare professionals, the public, and other relevant groups (eg, via publication, reporting in results databases, or other data sharing arrangements), including any publication restrictions | n/a                      |
| 42 |                                             |                      |                                                                                                                                                                                                                                                                                     |                          |
| 43 |                                             |                      |                                                                                                                                                                                                                                                                                     |                          |
| 44 |                                             |                      |                                                                                                                                                                                                                                                                                     |                          |
| 45 |                                             |                      |                                                                                                                                                                                                                                                                                     |                          |
| 46 |                                             |                      |                                                                                                                                                                                                                                                                                     |                          |
| 47 |                                             |                      |                                                                                                                                                                                                                                                                                     |                          |
| 48 |                                             |                      |                                                                                                                                                                                                                                                                                     |                          |
| 49 | Dissemination policy: authorship            | <a href="#">#31b</a> | Authorship eligibility guidelines and any intended use of professional writers                                                                                                                                                                                                      | n/a                      |
| 50 |                                             |                      |                                                                                                                                                                                                                                                                                     |                          |
| 51 |                                             |                      |                                                                                                                                                                                                                                                                                     |                          |
| 52 |                                             |                      |                                                                                                                                                                                                                                                                                     |                          |
| 53 | Dissemination policy: reproducible research | <a href="#">#31c</a> | Plans, if any, for granting public access to the full protocol, participant-level dataset, and statistical code                                                                                                                                                                     | n/a                      |
| 54 |                                             |                      |                                                                                                                                                                                                                                                                                     |                          |
| 55 |                                             |                      |                                                                                                                                                                                                                                                                                     |                          |
| 56 |                                             |                      |                                                                                                                                                                                                                                                                                     |                          |

## Appendices

|    |                      |                     |                                                               |     |
|----|----------------------|---------------------|---------------------------------------------------------------|-----|
| 1  | Informed consent     | <a href="#">#32</a> | Model consent form and other related documentation            | n/a |
| 2  | materials            |                     | given to participants and authorised surrogates               |     |
| 3  |                      |                     |                                                               |     |
| 4  |                      |                     |                                                               |     |
| 5  | Biological specimens | <a href="#">#33</a> | Plans for collection, laboratory evaluation, and storage of   | n/a |
| 6  |                      |                     | biological specimens for genetic or molecular analysis in     |     |
| 7  |                      |                     | the current trial and for future use in ancillary studies, if |     |
| 8  |                      |                     | applicable                                                    |     |
| 9  |                      |                     |                                                               |     |
| 10 |                      |                     |                                                               |     |

11 None The SPIRIT Explanation and Elaboration paper is distributed under the terms of the Creative  
12 Commons Attribution License CC-BY-NC. This checklist can be completed online using  
13 <https://www.goodreports.org/>, a tool made by the [EQUATOR Network](#) in collaboration with  
14 [Penelope.ai](#)  
15  
16  
17  
18  
19  
20  
21  
22  
23  
24  
25  
26  
27  
28  
29  
30  
31  
32  
33  
34  
35  
36  
37  
38  
39  
40  
41  
42  
43  
44  
45  
46  
47  
48  
49  
50  
51  
52  
53  
54  
55  
56  
57  
58  
59  
60
